# Supplementary material for: Widespread and precise reprogramming of yeast protein–genome interactions in response to heat shock
Source: HighWire-hosted journal article supplement (doi:10.1101/gr.226761.117), 2018-02-14
Supplement: Supplemental_Methods.zip [file fig4a.xlsx]

## Sheet: Sheet1
From : Huisinga KL, Pugh BF. 2004. A genome-wide housekeeping role for TFIID and a highly regulated stress-related role for SAGA in Saccharomyces cerevisiae. Mol Cell 13: 573-585.
DO NOT CHANGE THE SORT
	E257	E258	E259	E260	E261	E262	E263	E264	E265	E266	E265/6	E267
Gene ID	TBP Mutants / Chitikila		TFIID/SAGA / Huisinga	TFIID/SAGA / Huisinga	TFIID/SAGA / Huisinga	TFIID/SAGA / Huisinga	TFIID/SAGA / Huisinga	TFIID/SAGA / Huisinga	TFIID/SAGA / Huisinga	TFIID/SAGA / Huisinga	TFIID/SAGA / Huisinga	TFIID/SAGA / Huisinga	SAGA
	Expression	Expression	Expression	Expression	Expression	Expression	Expression	Expression	Expression	Expression	Expression	Expression	Occupancy change			Fold change in gene expression upon heat shock (log2)
Yeast ORF	SAGA	SAGA	TFIID	TBP	TBP	TBP	TFIID, SAGA/ADA	TFIID, SAGA	TFIID	TFIID	TFIID	TFIID SAGA/ADA
Gene ID	spt3D	spt3D	taf1-ts2 spt3D	taf1-ts2 @25˚C	wild type (TAF1 pRS313) (GCN5 pRS314)	wild type (TAF1 pRS313) (SPT3 pRS314)	taf1-ts2 gcn5D	taf1-ts2 spt3 (E240K)	taf1-ts2 (GCN5 pRS314)	taf1-ts2 (SPT3 pRS314)	taf1-ts2 (SPT3 pRS314)	taf1-ts2 gcn5(KQL)	Spt3 (WT)
	spt3D YKH104 (constit)	spt3D	taf1-ts2 spt3D YKH107 (constit)	NoHS YJS8 (taf1-ts2 @25˚C)	YJS6 (wild type (TAF1 pRS313) (GCN5 pRS314))	KH105 (wild type (TAF1 pRS313) (SPT3 pRS314))	taf1-ts2 gcn5D YKH101 (constit)	taf1-ts2 spt3 (E240K) YKH109 (constit)	YJS8 (taf1-ts2 (GCN5 pRS314))	YKH108 (taf1-ts2 (SPT3 pRS314))	YJS8+YKH108 (taf1-ts2 (SPT3 pRS314))	taf1-ts2 gcn5(KQL) YJS9 (constit)	WT
	25˚C -> 37˚C 45'; CSM+D	30˚C; YPD	25˚C -> 37˚C 45'; CSM+D	25˚C; CSM+D	25˚C -> 37˚C 45'; CSM+D	25˚C -> 37˚C 45'; CSM+D	25˚C -> 37˚C 45'; CSM+D	25˚C -> 37˚C 45'; CSM+D	25˚C -> 37˚C 45'; CSM+D	25˚C -> 37˚C 45'; CSM+D	25˚C -> 37˚C 45'; CSM+D	25˚C -> 37˚C 45'; CSM+D	25˚C -> 37˚C 3'; YPD				Figure 4A values
	Pugh	Young	Pugh	Pugh	Pugh	Pugh	Pugh	Pugh	Pugh	Pugh	Pugh	Pugh
	N(mode)--> log2 fold change/WT	P	N(mode)--> log2 fold change/WT	N(mode)--> log2 fold change/WT	N(mode)--> log2 fold change/WT	N(mode)--> log2 fold change/WT	N(mode)--> log2 fold change/WT	N(mode)--> log2 fold change/WT	N(mode)--> log2 fold change/WT	N(mode)--> log2 fold change/WT	N(mode)--> log2 fold change/WT	N(mode)--> log2 fold change/WT	Quantile normalized
	spotted	Affymetrix	spotted	spotted	spotted	spotted	spotted	spotted	spotted	spotted	spotted	spotted	ChIP-exo	Fig. 4A Classification
YMR121C	-0.292995	0.40344	-2.73135		-0.175995	-0.1844		-1.81594	-2.38954	-1.74759	-2.06857	-2.22487	11.4037	none			-0.416663	-0.281063	-0.774841	-0.517234	-0.681027	-0.537021		-0.125163	-0.137181	-0.250842	-0.254524	-0.179863	-0.193867
YPR132W	-0.595424	-0.29018		0.0384786	-0.16839			-2.25698					9.8647	none			Spt3		Spt3		Spt3			Spt3		Spt3		Spt3
YLR344W	-0.840636	-0.37846	-3.43856	0.039586	-0.208882	-0.00614876	-2.83369	-2.30113	-2.38624	-2.07045	-2.22834	-2.04214	9.76653	none			Induced		Repressed		No change			Induced		Repressed		No change
YLR388W	-0.562396	-0.43488	-3.25955	0.0833743	0.0472593	0.105063	-2.62496	-2.25976		-1.95615	-1.95615	-1.73176	9.66652	none			SAGA-dominated							TFIID-dominated
YOL039W	-0.69682	-0.31488	-3.37184		-0.0384937	-0.110376	-3.18016		-2.37655	-2.02772	-2.20214	-2.92029	9.6251	none
YLR340W	-0.433731	-0.30507	-2.48417			-0.026263		-1.77015		-1.89117	-1.89117	-1.48342	9.24872	none
YGL030W	-0.601485	-0.53395	-3.09069	0.20662	-0.160934	0.0914307	-3.05703	-2.0817	-2.36602	-2.14826	-2.25714	-2.88673	8.93762	none
YJL191W	0.202133	0.060385	-0.362243	0.216963	-0.137435	0.115822	-1.29035	0.197547	-0.703486	-0.434905	-0.569196	-0.695509	8.84862	none
YDR012W	-0.616966	-0.43222			-0.121442				-1.8881		-1.8881	-1.99684	7.22561	none
YAL004W					-0.823603	-0.427337	-0.951544	-0.344742		-0.981073	-0.981073	-1.21015		none
YAL018C	-0.448627		-1.95101	0.374277	-0.229745	-0.059219	-1.26325	-1.07729	-1.01914	-0.7661	-0.892621	-1.25758		none
YAL019W	-0.24628	-0.4237	-2.04805	0.0831888	-0.0464466	-0.104512	-2.27152	-1.79098	-1.64715	-1.04029	-1.34372	-2.68482		none
YAL021C		-0.39511												none
YAL026C	-0.238268	-0.35707		-0.0436733	-0.285311				-1.49874		-1.49874			none
YAL034C	-0.0216801		-0.628769	0.0478738	0.180533		-0.638026	0.13056	-0.643	0.226145	-0.208427	-0.654288		none
YAL035C-A	-0.405689		-1.95068			-0.108287		-0.397412				-0.776501		none
YAL043C-A	-0.152625		-2.50928		-0.159273	-0.0978609		-1.65824						none
YAL045C	-0.0122208		-2.18363	-0.0739681	-0.120354	0.177481	-2.15033	-0.819553		-1.07381	-1.07381	-2.46148		none
YAL054C			-2.32013	-0.39592	0.213559		-0.844156							none
YAL058C-A	-0.548465		-2.91782	-0.145147	-0.15128	-0.0180437	-2.28341	-1.48502	-1.84123	-1.21139	-1.52631	-2.23049		none
YAL061W	-1.8361		-2.50463	0.005033	0.244559	-0.141511	-0.51258	-0.96078	0.32459	0.708175	0.516382	-1.77142		none
YAL063C	-0.486856		-2.32298	-0.122665		-0.0756428	-1.8517	-0.786934		-1.1801	-1.1801	-1.603		none
YAL064W	-0.465527		-1.47496	-0.0268475	-0.396438	-0.0661759	-1.46682	-0.243936	-1.02774	-0.367522	-0.697629	-0.55827		none
YAL065C	-0.417701		-2.06101	-0.0430353	-0.0918037	-0.0909374	-1.95593	-0.790033	-1.4767	-1.04611	-1.2614	-1.8286		none
YAL065C-A	-0.124832		-2.29693	0.0704315	-0.00842131	-0.160383	-1.45668	-1.02881	-1.36618	-1.01456	-1.19037	-1.32787		none
YAL066W	-0.435776				-0.343326	-0.243554			-0.325544	-0.431828	-0.378686	-0.04673		none
YAL068C		-0.47363	-2.08002			0.122243								none
YAL069W			0.002877	0.105615	0.154196	0.0971362		-0.228714	-1.3058	-0.754501	-1.03015	-1.07483		none
YAR002C-A														none
YAR009C	-0.904749	-0.99693	-2.08795	0.0143463	-0.134914	-0.240145	-1.82641	-0.605957	-0.553454	0.44107	-0.0561921	-1.60745		none
YAR010C	-1.02191	-2.3713	-2.58628		-0.137143	-0.0114053	-1.65218	-0.502243	-0.417076	0.533598	0.0582608	-1.63063		none
YAR020C	-0.668444	-0.3412	-1.86958	0.0494599	-0.0101257	0.0705781	-1.23684	-0.805038	-1.12847	-0.614658	-0.871563	-0.91372		none
YAR023C	-0.798666		-2.30236	-0.0835378	-0.419763		-1.89789	-0.686688	-1.25371	-0.488072	-0.87089	-2.28131		none
YAR027W	-0.403739	-0.13991	-1.79113		-0.101875	-0.051813		-0.883125	-1.02239	-0.462132	-0.742263	-1.4345		none
YAR029W	-0.663652		-1.87588	0.0386872	-0.523277	-0.174334			-2.18403		-2.18403	-1.28442		none
YAR030C	-0.546113		-1.82105	0.0689795	-0.299584	-0.217524	-2.01572	-1.51707	-1.71324	-1.2936	-1.50342	-1.32566		none
YAR031W	-0.81332			0.0617295	0.0245612	0.161921		-1.94837	-0.941492	-1.5959	-1.26869			none
YAR033W		-0.06726	-3.24243	0.0958967	-0.254684		-1.82676	-1.6992	-1.80648		-1.80648	-1.67272		none
YAR035W	-1.04601		-1.92691	-0.148924	0.512838	0.113735	-0.01146	-1.32587	-1.0898	-1.09532	-1.09256	0.942479		none
YAR037W	-1.21729		-1.72747		0.678898	0.0288263		-1.32513		-0.658173	-0.658173			none
YAR040C	-0.935626		-1.67085			0.0659521				-0.533443	-0.533443			none
YAR043C			-2.30158		0.175297	0.076134		-1.32603						none
YAR044W	-0.252452		-2.30416	-0.0221104	0.074609	-0.0209322	-2.05027	-1.21792	-0.480366	-1.20661	-0.843486	-1.98264		none
YAR047C	-0.432404		-2.10099		-0.0944581	-0.172344				-0.78829	-0.78829	-2.07734		none
YAR050W	-0.696226		-2.28339	-0.026595	-0.0929826	-0.0907132	-2.02226	-1.32416	-1.60351	-1.48266	-1.54308	-1.90583		none
YAR052C				-0.0946899	-0.0940444	-0.132219	-1.83684	-0.756209		-1.04444	-1.04444	-1.70598		none
YAR053W	-0.756036		-2.16248			-0.160413		-0.426064		-1.06864	-1.06864			none
YAR060C	-0.42159			-0.00238571	-0.368131	-0.179747	-1.74448	-1.15968	-1.51093	-1.5602	-1.53556	-1.34377		none
YAR061W						-0.106137				-1.14609	-1.14609			none
YAR062W	-0.833813					-0.143037				-1.83316	-1.83316			none
YAR064W	-1.23809		-3.50432	-0.182269	-0.188643	0.0662876	-2.40444	-1.67401	-2.1825	-2.12214	-2.15232	-1.7268		none
YAR066W	-1.17692		-3.42267		-0.442208	-0.127192		-1.80297	-0.976465		-0.976465			none
YAR068W	-0.890479		-2.79366	0.00434781	-0.239003	-0.098303	-0.971828	-0.249507	-1.00003	-1.2951	-1.14756	-0.678745		none
YAR069C	-0.544354		-2.04869	-0.0741744	0.00982895	-0.170968	-1.91231	-1.22792	-1.68255	-1.31648	-1.49952			none
YAR070C			-1.7341		-0.139129	-0.269109		-0.0888466		-0.281273	-0.281273			none
YAR071W	-0.92222	-3.1053	-2.73666	0.184299	-0.268958	0.0851946	-2.38853	-2.27271	-2.42343	-1.97412	-2.19877	-2.11262		none
YAR073W	0.0047398	-0.32345	-2.36235		0.195737	0.00803427		-2.13378	-2.13649	-1.98182	-2.05915			none
YAR074C	-0.170835		-2.29619		-0.0877928	0.0755246		-1.90022						none
YAR075W	-0.183049	-0.34597	-2.44312	0.0114152	0.133339	0.0519971		-1.72191	-2.04733	-1.6657	-1.85652			none
YBL005W	-0.182848	-0.35298	-1.47072	-0.134138	-0.127369	-0.105621		-0.73263	-1.13064	-0.52354	-0.827089	-1.08926		none
YBL005W-A														none
YBL005W-B			-1.45218	0.0427757	0.0132152	-0.311929	-1.42636	-0.447535	-0.261202	0.441594	0.0901961	-1.53827		none
YBL008W	-0.277149		-1.98112	0.062076	0.0540142	0.0242797	-1.72247		-1.24569	-0.575032	-0.91036	-2.06922		none
YBL010C						-0.0972915		-0.485451						none
YBL012C	-0.577454		-2.5745	-0.192144	-0.0030034	-0.184645	-2.14994	-1.0334	-1.76987	-0.901044	-1.33546	-1.92829		none
YBL013W	-0.707527		-2.48586		-0.0890925	0.0733693		-1.29005		-0.844636	-0.844636			none
YBL016W	-0.617417		-1.96503	-0.15601	0.184139	0.182962	-1.59107	-0.412	-0.611954	-0.00944692	-0.3107	-1.47205		none
YBL022C	0.278472	-0.22798	-1.41659		-0.242167	-0.0465821		-0.0884336	-0.957603	-0.617167	-0.787385	-1.15708		none
YBL026W	-0.0040859				-0.0029805	-0.174268								none
YBL027W		-0.49925			-0.0797882									none
YBL032W		-0.31459												none
YBL034C	-0.0461716	0.011623			-0.0072326			-1.2652	-1.12651	-0.69438	-0.910445	-0.908001		none
YBL039C		-0.43891	-2.9283	0.00587653	-0.127947	-0.093729	-2.873	-2.13777	-2.33271	-1.95469	-2.1437	-2.68205		none
YBL044W	-0.281865			0.198434	-0.367877	-0.0621391	-1.25103					-0.610877		none
YBL048W	-0.0504865		-1.9753	0.0598579	-0.095487	-0.00989283	-1.26068	-0.738892	-1.13764	-0.536859	-0.83725	-1.1049		none
YBL049W	0.192901			-0.0190284	-0.309759	0.162519	-1.10444	-0.46327	-1.13992	-0.386249	-0.763083			none
YBL053W	-0.0664774		-2.04537	-0.015693	0.273608	-0.175688	-2.2235					-1.96255		none
YBL054W	-0.609684	-0.99776	-2.37548	-0.0542716	0.0179229	0.237549	-2.68814	-1.51269	-2.01451	-1.33301	-1.67376	-2.01246		none
YBL062W			-1.8784			0.0729632		-1.16123						none
YBL065W	0.0069595		-0.777118	0.101652	0.0385377	-0.0600977	-0.966436	-0.136604	-0.788765	-0.211005	-0.499885	-0.880546		none
YBL069W	-1.58445		-2.95775	-0.0870811	-0.209523	-0.151203	-1.68916	-0.748594	-0.4501	-0.363922	-0.407011	-1.55554		none
YBL070C						-0.0219366		-0.520713		-0.322498	-0.322498			none
YBL071C	-0.234993		-1.94667	-0.03692	-0.0523677	0.113111	-1.82998	-0.910776	-1.20846	-0.99247	-1.10047	-1.33248		none
YBL072C		-0.62347												none
YBL073W	-0.0780512		-1.44974	-0.0953934	-0.205571	-0.0165408	-1.46857	-0.441904	-0.912222	-0.32564	-0.618931	-1.19913		none
YBL074C	-0.224795		-1.37003		-0.130154	-0.204	-1.38945	-0.27069	-0.807246	-0.18103	-0.494138	-1.51596		none
YBL075C	2.85178		2.52675		-0.413809	-0.0507553		3.01105	0.878042	0.952419	0.91523	1.24187		none
YBL077W	-0.257479		-2.21927	0.271018	0.0288065	-0.0836482	-2.21893	-1.91684	-1.63604	-1.34183	-1.48893			none
YBL079W		-0.80781				-0.12776		-0.801674		-0.888453	-0.888453			none
YBL082C	-0.280705	0.29086	-2.09076		-0.0016205	0.116264			-1.4542	-1.22991	-1.34205			none
YBL084C	-0.173	0.011642	-1.06466		-0.323609	0.000859725			-0.863296	-0.0309813	-0.447139	-0.621368		none
YBL085W		-0.41966												none
YBL087C	-0.908993	-0.41615	-3.54921	-0.0793254	-0.268272	-0.0414822		-2.32926	-2.61047	-2.16941	-2.38994			none
YBL092W	-0.667333	-0.42213			-0.0631889	0.0663108								none
YBL094C	-0.184405		-1.7834	0.11884	-0.0747799	-0.0133002	-1.7633	-1.26735	-1.42968	-0.526439	-0.978058	-1.3881		none
YBL096C	-0.172772		-2.17585	0.00468345	-0.0366651	0.0951969	-1.78244	-1.12585	-1.47308	-0.770809	-1.12194	-1.60707		none
YBL098W	-1.62202		-2.09633		-0.362301			-1.48482	-1.6485	-1.94691	-1.79771			none
YBL100C	-0.0265396		-1.61841	0.226756	-0.0272787	0.0617791	-1.82243	-0.559295	-0.546758	-0.451919	-0.499339	-2.04292		none
YBL101W-A					-0.0162038	-0.0163875		-0.770968						none
YBL101W-B	-0.782664		-2.06455		-0.117387	-0.0709697	-1.68145	-0.815459		0.121932	0.121932	-1.32251		none
YBL104C	-0.274394	-0.47286			-0.0659852	-0.311562	-0.881493	-0.434209	-1.27466	-0.264871	-0.769765	-0.866403		none
YBL105C			-1.50519		0.105083	-0.0654431								none
YBL107C					-0.195136	-0.116226								none
YBL108W	-0.978282		-2.2671	-0.0606387	0.123033	-0.154732	-1.33152	-0.100072		-0.972234	-0.972234	-0.586918		none
YBL109W						0.195433								none
YBL111C	-0.812601	-0.5041	-3.73807	-0.0586043	-0.084197	-0.0872445	-2.82516	-2.85559	-2.22108	-1.98997	-2.10552	-2.74596		none
YBL112C	-0.512459	-0.38799	-3.56206	-0.0810106	0.168868	0.109842	-2.63814	-2.55046	-1.67966	-1.69851	-1.68908	-2.70615		none
YBL113C	-0.605689	-0.57873	-3.40716	-0.128819	0.0790853	0.0553468	-2.92207	-2.34376	-2.11929		-2.11929	-2.64606		none
YBR012C	0.458714			0.334263	-0.207423		-1.29789	-0.863223		1.64336	1.64336	-1.30542		none
YBR012W-A	-0.799942		-2.30967	-0.0251595	0.111085	-0.161368	-1.62611	-0.433164	-0.457436	0.479471	0.0110177	-1.53622		none
YBR012W-B	-0.391551		-1.6082	0.00938877	-0.0590527	-0.388717	-1.24332	-0.259532	-0.121018	0.549164	0.214073	-1.56506		none
YBR013C	0.382094		-1.82141	0.0497206	-0.24005	-0.094578	-1.93864	-0.852202	-1.46966	-1.1207	-1.29518	-2.22026		none
YBR017C	-0.148129				0.0147108		-1.01826		-0.790899	-0.562258	-0.676578			none
YBR018C	-0.14641		-1.832	-0.0582682	-0.246926	-0.149042	-1.86559		-1.41517	-1.16825	-1.29171	-1.45921		none
YBR019C	-0.614766		-2.22992	0.0407417	-0.0520277	-0.0546925	-1.83946	-0.634183	-1.26384	-0.745425	-1.00463	-1.75754		none
YBR020W	-0.536076		-1.38181		-0.204112	-0.029204	-1.81052	-0.542034	-1.24425		-1.24425	-1.22955		none
YBR026C	-0.0946687	-0.51439	-2.70297	0.0572725	-0.0262792	-0.0754553	-1.29963	-1.14782		-1.06968	-1.06968	-1.75214		none
YBR027C	-0.486277		-2.15474	-0.227206	-0.239167	-0.0192368	-1.46349	-0.591477	-0.54418	0.202457	-0.170861	-1.32755		none
YBR028C	-0.299832	-0.10732	-2.09923	0.163856	-0.135866	-0.0713838	-1.77692	-0.756525	-1.17999	-0.378317	-0.779154			none
YBR031W	-0.835712	-0.32481	-2.97753	-0.00810262	-0.149915	-0.115498	-2.61275	-2.05634	-2.25217	-1.84089	-2.04653	-1.92647		none
YBR032W	-0.610018				-0.393973		-1.30228			-0.341736	-0.341736	-0.52734		none
YBR033W			-2.1771		0.0483659	0.0586302		-0.512054	-1.03591	-0.204677	-0.620292	-1.1798		none
YBR040W			-2.63441	0.0722134	0.198606	-0.0128746		-1.27952	1.02287	1.20474	1.1138			none
YBR047W	-0.881451		-2.33375	0.768193	0.017408		-1.67318	-1.35146	-1.28711		-1.28711	-1.21129		none
YBR048W	-0.976551	-0.41791	-2.75974	0.0288518	-0.0728035	0.10302	-2.75051	-1.57444	-2.15821	-1.69237	-1.92529	-2.30472		none
YBR050C	-0.825007			0.292994	0.984102	0.177927	-1.22175		-2.03952	-0.282299	-1.16091	-1.39153		none
YBR051W	-0.886676			0.208111	0.628217	0.169114	-1.13258	-0.868013	-0.978737	-0.243837	-0.611287	-1.1892		none
YBR063C	0.0261519	-0.20119	-1.29885	0.135525	-0.208526	0.0384834	-1.51665			-0.0922169	-0.0922169	-1.38204		none
YBR064W	0.0315224		-1.22826	0.169123	-0.135439		-1.60621	-0.809224	-1.21121	-0.916842	-1.06403	-1.25604		none
YBR065C	-0.0977308		-1.5177	0.0909771	-0.106347	-0.147475	-1.3411	-0.250569	-0.888151	-0.388045	-0.638098	-1.38029		none
YBR075W	-0.408194	-0.52169	-2.09456	0.161656	-0.180567	-0.0942631	-2.05713	-1.39972	-1.55178	-1.41693	-1.48436	-1.96375		none
YBR076W			-1.58282	0.220555	-0.191841	-0.157055	-1.04415	-0.505298	-0.543311		-0.543311	-0.952471		none
YBR077C	0.0460976	0.58059	-1.89795	0.185792	-0.0611878	0.217329	-1.68814	-1.08245	-1.39328	-0.930645	-1.16196	-1.7586		none
YBR084C-A				0.167	-0.103591	-0.00571501	-2.624					-2.61153		none
YBR089W	-0.318045		-3.4512		-0.257026	0.0920429		-1.47401		-0.232333	-0.232333	-1.7816		none
YBR090C	-0.26866		-2.14607	0.0939767	0.133694	0.151674	-1.34314	-1.15022	-0.981165	-0.38361	-0.682388	-0.77179		none
YBR090C-A	-0.101287		-2.05415		0.0427892	0.228125		-0.702983		-0.264693	-0.264693	-1.22871		none
YBR091C	0.302488	-0.41111	-1.59658	0.131987	-0.148126	0.156752		-0.320826	-1.01641	-0.596532	-0.806469	-1.34566		none
YBR092C	-1.24029	-2.8722	-4.46304	0.256898	0.0193692	0.145954	-3.96084	-2.21683	-2.85817	-2.93292	-2.89554	-3.94435		none
YBR093C			-3.67096	0.277879	-0.144024	0.111736		-1.7924	-2.23541	-2.08986	-2.16264	-2.69495		none
YBR097W		-0.87597		0.321246	0.151521	-0.0345571		-0.722785						none
YBR099C	-0.164889		-0.922622		-0.242675	-0.311218	-1.93419	-1.42951	-1.36358	-0.972479	-1.16803	-1.6357		none
YBR100W	-0.186746		-0.796155	0.316111		-0.220842	-1.84318	-1.42312	-1.48159	-0.962124	-1.22186	-2.10162		none
YBR110W	-0.0880169	0.097348	-1.66802	0.184	0.0454731	0.0962537	-1.44501	-0.599468	-1.0118	-0.523486	-0.767645	-1.79287		none
YBR113W	-0.0414576		-1.89589	-0.197567	0.214392	0.121081	-1.65103	-0.998466	-1.28675	-0.630573	-0.958661	-1.54192		none
YBR116C	-0.128604		-1.13362	0.0629639		-0.147976	0.10565	1.47489	0.56445	0.124159	0.344305	-1.293		none
YBR117C	0.0099896		-0.941909		-0.339202	-0.0604593		1.56931		0.229813	0.229813			none
YBR121C	-0.460744	-0.38701	-2.73701	0.0262311	0.0903874	0.0467083	-2.19889	-1.9197	-1.80815	-1.70571	-1.75693	-2.51717		none
YBR124W	-0.306708		-1.47376	0.138317	-0.0629776	-0.00919822	-1.36366		-0.888994		-0.888994	-1.51888		none
YBR128C	0.0258799		-1.85598	-0.0451156	-0.0922365	0.017248	-1.45344		-1.17269	-0.253827	-0.713257	-1.01448		none
YBR134W	-0.435545		-2.10198	0.0204276	0.0185307	0.168297		-0.703985		-0.427125	-0.427125	-1.24667		none
YBR141C	-0.145234	-0.14627	-1.82226	0.0406619	-0.266534	-0.144993	-1.68826		-1.50547	-0.548251	-1.02686	-1.42127		none
YBR144C	-0.570787		-2.21775	-0.057427	0.0146946	0.0916839	-2.16833		-1.65754	-1.05509	-1.35632	-1.85925		none
YBR147W	-0.983714		-3.15029	0.217866	0.132098	-0.0616313	-0.634595	-0.822411	-0.262263	0.64341	0.190574	-1.86775		none
YBR148W	-1.10727		-2.21503	0.0469819	-0.345291	-0.245371	-1.38952	-1.21665	-1.61927		-1.61927	-1.63625		none
YBR153W	-0.0795837	-0.11715	-1.52565	0.154272	-0.067119	0.0930806	-1.38987	-0.581587	-1.03794	-0.505972	-0.771957	-1.47206		none
YBR174C	-0.246216		-1.17206	0.114478	-0.472295	-0.155121	-1.6959	-0.993453	-1.05497		-1.05497	-1.54733		none
YBR178W	-0.0498858		-1.92538	0.189847	-0.140387	-0.166639	-1.89479	-1.33619	-1.18052		-1.18052			none
YBR180W	-0.212051		-1.76691	0.117748	-0.344758	0.0355884		-0.845754		-0.629842	-0.629842			none
YBR181C		-0.29198	-3.41749	-0.00171954	-0.183627	-0.206975	-3.20612	-2.28525	-2.59083	-1.84412	-2.21748	-3.1003		none
YBR186W	-0.298854		-2.1119	-0.265656	-0.375203	0.0150685	-1.88913	-0.992951	-1.5957	-0.912792	-1.25425			none
YBR189W	-0.503609	-0.39659	-2.60769	-0.0677578	-0.128335	0.148032	-2.99244	-1.72139	-2.40713	-1.74217	-2.07465	-2.57961		none
YBR190W	-0.316515			-0.170772	0.0595365		-1.55487					-1.29495		none
YBR191W	-0.640601	-0.53263	-2.71841	0.0127983	0.0224334	0.215505	-3.07001	-1.83514	-2.17382	-1.63557	-1.90469	-2.626		none
YBR206W	-0.672334	-0.50641	-3.09839	0.0386385	-0.147273	0.00783207	-2.83325		-2.29555	-1.70936	-2.00245	-2.86756		none
YBR209W	-0.602498			0.0805428	-0.27461	0.189916	-1.84422	-0.958605	-1.68397		-1.68397	-1.24398		none
YBR220C	-0.83119		-3.3122	-0.117654	-0.153149	-0.218314	-2.94446	-1.35652	-2.23791	-1.43681	-1.83736	-2.56896		none
YBR224W			-1.58812		0.145772	0.0300328	-0.6085	-0.201619	-0.415213	-0.112921	-0.264067	-0.533262		none
YBR225W	-0.0786219		-1.67965	-0.0487497	0.0298116	0.219833	-1.21449	-0.0573461	-0.98358	-0.0695067	-0.526543	-1.01119		none
YBR226C	0.0350106		-1.29341	0.21365	-0.0499503		-1.24133	-0.449231	-1.01697	-0.233423	-0.625195	-1.00622		none
YBR227C	-0.161882	-0.7155	-2.02318		0.00146071		-1.54239	-0.843677	-1.08978	-0.499903	-0.794842	-1.81577		none
YBR232C	-0.304293		-2.54989	0.068287	-0.223546	0.056259	-2.44239	-1.22038	-1.60466	-1.2375	-1.42108	-2.46128		none
YBR237W	0.0855931	-0.38035	-1.27259			0.218324	-1.06237		-0.793248		-0.793248			none
YBR240C	-1.08505		-2.71419	-0.0905649	-0.43469	-0.0626779	-1.46026	-0.438159	-1.62609	-1.55272	-1.58941	-1.26643		none
YBR249C	-1.02968	-0.62571	-3.88897	0.0510481	0.000170627	0.108168	-3.13085		-2.08337	-1.74786	-1.91562	-2.63469		none
YBR265W	-1.07865	-0.87874	-2.62789	-0.00883789	-0.161897	-0.0866956	-2.02712	-1.1868	-1.30645	-0.958955	-1.1327	-1.79329		none
YBR266C	-0.552694		-2.68309	-0.0313399	-0.157782	0.06212	-2.09387	-1.51178	-1.64508	-1.35347	-1.49928	-2.15133		none
YBR277C	-0.608893			0.069922	-0.181081	-0.0724193		-2.32488	-2.27862	-1.56426	-1.92144	-2.77729		none
YBR285W	-1.2274		-2.723	-0.0575234	0.504474	-0.0501173	-1.17604		-0.621181	-0.0643407	-0.342761	-1.34523		none
YBR292C	-0.448783		-1.81528	0.431607	-0.223426	0.0885806	-1.31368	-0.947453	-1.01726	-0.523179	-0.770222			none
YBR294W	-0.827577		-2.34023	0.104494	-0.0153427	0.101947	-1.79121	-1.01329	-1.26571	-0.656862	-0.961285	-0.878159		none
YBR296C	-0.162759				0.165182	0.141946	-1.4233	-0.458793		0.87222	0.87222	0.25165		none
YBR297W	-0.208741			0.0377607	0.496071	-0.0121924	-1.57686	-1.30779	-1.50662		-1.50662	-1.1741		none
YBR299W	-0.709813				0.333373	0.230649								none
YBR300C			-1.61882	0.0150521	-0.103706		-1.63382	-1.23673		-0.715024	-0.715024	-0.888574		none
YBR301W	-1.13252	-0.40368	-2.04584	0.0929225	-0.182157	-0.0309961	-2.04711	-1.81166	-1.82608	-1.85036	-1.83822	-1.18152		none
YBR302C	-0.3768	-0.45378	-2.45201	0.15065	-0.105341	-0.0388415	-1.72162	-1.5029	-1.32182	-1.32717	-1.32449	-1.36544		none
YCL002C	-0.811324	-0.36466		-0.00457765	-0.253453	-0.0864631	-2.30678	-1.58579	-1.64446	-1.02357	-1.33402	-1.34703		none
YCL003W	-0.215565		-1.21055	0.0944393	-0.0946441	0.0436065	-1.51938	-0.606433	-1.11281	-0.634644	-0.873727	-1.14029		none
YCL006C	-0.0258723		-1.3991	0.189496	-0.289757	-0.0568241	-1.64872	-0.686352	-1.09909	-0.821701	-0.960395			none
YCL007C	-0.184859		-2.62076	0.0320705	0.118539	0.280196	-2.18211	-1.47147	-1.88943	-1.27554	-1.58248	-2.09264		none
YCL012W	-0.3541		-2.69174	-0.222649	-0.154548	-0.0901248	-2.70252	-2.17396	-2.30684	-1.67523	-1.99103	-2.44727		none
YCL013W	-0.263432		-2.99086	0.104676	-0.0899094	-0.109302		-1.80521	-2.16515	-1.50061	-1.83288	-2.51774		none
YCL019W	-1.10509	-0.76973	-2.14827	0.174039	-0.0184332	-0.207912	-1.74081	-1.12089	-0.363876	0.0156197	-0.174128	-1.66102		none
YCL020W	-1.35098		-2.85737	0.110222	-0.153111	-0.0993441	-1.93886	-1.00442	-0.799525	-0.0205556	-0.41004	-1.57712		none
YCL021W	-0.241954		-1.39202	0.213507	-0.182103	-0.320497	-1.72927		-0.351854	0.493416	0.0707807	-1.44401		none
YCL022C	-0.76256		-3.64519		-0.347394	-0.176324	-2.96312	-2.2186	-1.89525	-1.6085	-1.75187	-3.18585		none
YCL023C	-0.549975		-2.07844	0.308631	-0.579487	-0.136438	-2.22252	-1.48133	-1.16238	-0.881699	-1.02204			none
YCL026C	-0.738131				-0.339599	0.0171528		-0.825979		-1.47829	-1.47829			none
YCL027W	-0.37073		-2.02585	-0.13178	0.238842	0.185972	-0.774488	-0.0234736	-0.337981	0.424396	0.0432075	-0.590061		none
YCL039W	0.135658	0.21671	-1.09089	0.361775	-0.0533732		-1.19971	-0.561505	-0.795473	-0.510605	-0.653039			none
YCL040W	-1.62406	-0.64457	-1.67904	0.0441259	0.244477	0.00651482	0.835798	1.41141	0.980251	1.09893	1.03959	0.279799		none
YCL041C	-0.193907		-1.60285	0.0339898	-0.154814	0.070673	-1.39102	-0.290978	-0.63481	-0.533838	-0.584324	-0.728578		none
YCL046W	-0.180285		-1.75911	0.274549	0.0149478	0.00606042	-1.79895	-0.863876	-1.35351		-1.35351	-1.73856		none
YCL048W					-0.424019		-1.29528	-0.662808		-0.758873	-0.758873	-0.39533		none
YCL053C	0.0490539		-1.76383	0.127545	-0.142523	0.0347647	-1.60358	-1.32207	-1.49015	-1.21049	-1.35032	-1.50729		none
YCL058C	0.294747		-2.28896	0.0190779	-0.0590739	0.326246	-2.04104	-1.03014	-2.07923	-0.970896	-1.52506	-1.7043		none
YCL060C	-0.379683		-2.93477	0.0809684	-0.168389	-0.180008	-2.45263	-1.51396	-1.45693	-0.949819	-1.20338	-2.62681		none
YCL062W	-0.460225	0.4268	-2.42147	0.177122	-0.162877	-0.121226	-2.41659	-1.9006	-1.78502	-1.23959	-1.5123	-2.39699		none
YCL065W	-0.116989		-2.555	0.187764	0.111914	0.165116	-1.8995	-0.44466	-0.938358	-0.824111	-0.881235	-1.60512		none
YCL066W	-0.0912195	-0.076584	-2.6777	-0.117232	0.125654	0.30415	-1.94617	-0.254326	-1.28044	-0.918835	-1.09964	-2.07336		none
YCL067C	0.242201	-0.46553	-0.829672	0.0138171	-0.0487956	-0.0462989	-0.950126	1.2327	0.126105	0.648117	0.387111	-1.00566		none
YCL068C	-0.327037		-1.35389		-0.285503	-0.0458259	-1.25035	-0.196682		-0.420023	-0.420023	-0.843643		none
YCL069W	-0.530368		-2.17929		-0.33229	-0.00229147	-1.37354	-0.991761	-1.53114	-0.883391	-1.20727			none
YCL073C	-1.01122	-0.50907	-3.17779	0.0925105	-0.114491	0.0713502		-1.70658	-1.51216	-1.03401	-1.27309	-0.714478		none
YCL074W	-0.438276		-1.16797	0.316183	0.0141266	-0.127817	-0.624402	-0.706207	-0.422619	-0.0876911	-0.255155			none
YCL075W	-0.600199		-1.67417		-0.197313			0.115612	0.07054	-0.025559	0.0224905			none
YCL076W					-0.404344					0.252403	0.252403			none
YCLX01W	0.316809		-2.30812	0.0628791	0.0837769	0.328931	-2.0997	-1.0376	-1.95639	-1.07246	-1.51442			none
YCLX02C	0.119265		-1.67513	0.22546	-0.0438647	-0.07725	-1.48214	-1.23156	-1.3533	-1.01172	-1.18251	-1.45076		none
YCLX03C	-0.552776				-0.131821	-0.123718	-1.29104	-0.839715	-1.35167		-1.35167	-0.922901		none
YCLX04W	0.207433		-0.82215	0.0563989	-0.0710716	-0.0227215	-0.814397	-0.185793	-0.548283	-0.23658	-0.392432	-0.654231		none
YCLX05C	-0.367603		-2.06643		0.00235235	-0.102824	-1.67386	-1.00035	-1.17739		-1.17739	-1.39564		none
YCLX06C	-0.137844		-1.87161	0.0649247	0.260029	0.161888	-1.90644	-0.739583	-1.40539		-1.40539	-2.00766		none
YCLX07W	-0.831872		-1.97552	0.0647043	0.261082	0.190149	-0.550361	-0.237392	-0.19802	0.315846	0.058913	-0.573763		none
YCLX08C	-0.77676		-2.29112	0.178962	-0.0343914	0.0304608	-1.2867	-1.17762	-1.47734		-1.47734	-1.00417		none
YCLX09W	-0.745174		-2.8839	0.339128	0.290759	0.213986	0.508173	0.376586	0.684591	1.04563	0.865112	-0.183196		none
YCLX10C	0.789867		-0.963273	-2.1379e-05	-0.104948	0.153047	-0.893119		-0.956874	-0.939656	-0.948265	-1.15113		none
YCLX11W	-0.678974		-2.28807	0.0852233	0.119321	0.149456	-2.54141	-1.4195	-1.62514	-1.10799	-1.36657	-2.38098		none
YCLX12W	-0.480233				-0.0673675	0.0687333	-1.67676	-0.731663	-1.1996	-0.726483	-0.963042			none
YCR001W	-0.569531		-2.32889	0.0160194	-0.306827			-1.27578						none
YCR006C	-1.16785			-0.185572	-0.024113		-2.1129	-1.7485		-1.05118	-1.05118	-1.07346		none
YCR013C														none
YCR017C		-0.10069												none
YCR018C														none
YCR019W	0.083173	-0.00062696						-0.659119						none
YCR020C	0.211719	0.2451	-0.43333	0.0919449	-0.287081	0.0505602	-1.42029	-0.736138	-1.17528	-0.595286	-0.88528			none
YCR022C	-0.174371					0.0849178						-1.27393		none
YCR024C-A	-0.498713		-3.34951	0.215237	-0.0378775		-0.931617	0.0956465	-0.354888	0.0336071	-0.160641	-1.30018		none
YCR025C	0.512378		-0.185981	-0.10453	-0.322464	0.0154026	-1.677		-1.15708		-1.15708	-0.909231		none
YCR026C	-0.0938371	-0.040081	-1.35314	0.0431072	-0.0492392	-0.0462073	-1.5452	-0.839041	-1.20894	-0.628301	-0.918621	-1.49665		none
YCR029C	0.0582446	-0.19358	-1.43808	0.283183	0.112299	0.0214652	-0.97726	-0.628952	-0.742911		-0.742911	-1.44901		none
YCR029C-A	-0.472101		-2.83697	0.22994	-0.114522	0.0581508	-2.14966		-1.48275	-1.47937	-1.48106	-2.52328		none
YCR030C	-0.130824		-1.38459	0.232209		0.241971	-0.946353	-0.426396	-0.499523		-0.499523	-0.63832		none
YCR031C	-0.508073	-0.51366	-2.16409		-0.149238	-0.0356246		-1.41341		-1.54009	-1.54009	-2.14385		none
YCR038C	-0.228806		-1.2501	0.189506	-0.071793	0.0523126	-1.17105	-0.347236	-1.11824	-0.357484	-0.737862	-1.15972		none
YCR039C	0.372821	-0.44212	-0.778981	0.123944	-0.0274787	-0.0484921	-1.06938	1.48136	-0.184484	0.707475	0.261495	-0.916275		none
YCR040W	-0.0649394	-0.35975	-2.59096	-0.0132595	0.0900942	0.268195	-2.3795	-0.228972	-1.12368	-0.856891	-0.990284	-2.14629		none
YCR041W	-0.118197		-2.42537	0.17753	0.133246	0.247207	-1.94247		-0.798799	-0.84204	-0.820419	-1.84999		none
YCR045C	-0.782932		-2.75428	0.0253143	-0.238026		-1.45816	-1.43349		-1.00271	-1.00271	-1.45705		none
YCR049C	0.154328		-2.00562	-0.143694	-0.0126454	0.0405541	-2.34324	-1.32233	-1.6629	-1.58546	-1.62418	-2.20203		none
YCR050C	0.0096118		-1.92535	0.00626492	-0.0235293	0.00736819	-2.10825		-1.83887	-1.5025	-1.67068	-2.01233		none
YCR053W		-0.40023												none
YCR055C	-0.301342	-0.53441	-1.92687	0.0581504	-0.0390071	0.0641053	-1.68027	-1.24928	-1.54174	-1.03133	-1.28654	-1.66828		none
YCR056W	-0.335156		-1.94151	-0.185112	0.00730386	0.142157	-2.06314	-1.2014	-1.54958	-1.14696	-1.34827	-1.73323		none
YCR058C	-0.506617	-0.16986	-2.04877	-0.156874	-0.0739047	0.190212	-2.06319	-1.49009	-1.41261	-1.23527	-1.32394	-1.63215		none
YCR062W	-0.416802	-0.42532	-2.47282	0.150009	-0.11132	0.0949085	-1.33866		-0.925056	-1.07835	-1.0017	-0.660191		none
YCR064C	-0.8399		-2.22118	0.0799238	-0.163184	0.0766256	-1.80778	-1.67682	-1.93864	-1.42924	-1.68394	-1.37515		none
YCR069W		-0.63122												none
YCR070W		-0.35675												none
YCR074C	-0.397983		-3.0287	-0.132685	0.1421	0.0907142	-1.90097	-1.34679	-1.06807	-0.949985	-1.00903	-2.31978		none
YCR080W	-0.16284		-1.04464	0.0265391	-0.334455	-0.0902114	-1.20838	-0.246671	-0.93685	-0.376718	-0.656784	-1.11619		none
YCR085W	-0.310279		-2.29504	0.119875	-0.164286	0.0251621	-1.8452	-0.177883	-1.0161	-0.711294	-0.863699	-1.85698		none
YCR087W	-0.122921		-2.91264	-0.10065	0.148326	0.291208	-2.17293	-1.44899	-1.89544	-1.33792	-1.61668	-2.1121		none
YCR096C	0.440265	-0.46878	-0.814924	0.198391	-0.11306	0.028812	-0.852705	1.54147	0.037382	0.670526	0.353954	-0.941732		none
YCR097W-A	-0.535439		-1.80632	0.0627454	-0.198498	-0.417655	-1.24379	-0.102451	-0.865664	-0.20974	-0.537702	-1.38583		none
YCR097W-B	0.0017713		-1.15636		-0.10495		-1.09359		-0.871854	0.141232	-0.365311	-0.851115		none
YCR098C	-0.52355		-2.29538	-0.157444	-0.112699	-0.0933985	-1.5236	-1.54516		-1.19311	-1.19311	-0.738557		none
YCR100C	-0.324956		-1.632	0.135963	0.24889	-0.00767858	0.08251	-0.523634	-0.635436	-0.139421	-0.387429	0.458508		none
YCR101C	-0.381829		-1.89698	0.105301	0.212474	-0.0036177	0.0718	-0.354745	-0.58231	-0.0312959	-0.306803	0.298687		none
YCR102C	-0.239738		-2.03851	0.0537356	-0.0171005	-0.03	-1.5447	-0.970367	-0.862493	-0.946747	-0.90462			none
YCR103C	-1.00834		-2.87412	0.119025	-0.0722787	-0.267263	-1.90009	-1.18376	-1.53695	-1.65796	-1.59746	-1.6414		none
YCR104W	-0.73145	-0.35614	-1.23647	0.135079	-0.192898	0.297184	-1.42629	-0.945554	-1.08827	-0.983549	-1.03591	-0.467324		none
YCR105W	-1.31578		-3.48593	-0.238658	0.049006	0.110685	-1.56595	-1.96369	-1.58076	-1.42351	-1.50214	-1.3549		none
YCR106W	-0.766482		-3.01039	0.00318922	0.0659433	0.0642697	-2.03493	-1.40097	-1.48896	-1.01664	-1.2528	-1.99892		none
YCR107W	-0.747097		-2.48186	0.0643216	0.109455	0.0532468	-1.95099	-1.41684	-1.43464	-1.31007	-1.37236	-2.00108		none
YCRX01W	-0.161581		-2.61537	0.176669	-0.195885	-0.253053		-1.29185		-1.15197	-1.15197	-2.42723		none
YCRX02C														none
YCRX03C	-0.260484		-1.81097	-0.38507	-0.192637	-0.322141		-0.532486	-0.764939	-0.586068	-0.675503	-1.22241		none
YCRX04W	-0.347572		-2.08655	0.185491	-0.152251	0.000341788	-1.56309	-0.873319	-1.12478	-0.873026	-0.998905	-1.60307		none
YCRX05W	0.232069		-1.75227	0.00594088	0.0566965	-0.221344	-1.20173	-0.0995406	-0.660023	-0.496878	-0.57845	-1.59498		none
YCRX06W	-0.813933		-2.5409		-0.187794	0.0752579	-1.83371	-1.42283	-1.03446	-1.05218	-1.04332	-1.14346		none
YCRX07W	-0.971998		-1.8674	-0.0910948	-0.0733794	0.118071	-1.91358	-1.47508		-1.24557	-1.24557	-1.80168		none
YCRX08W	0.232712		-1.66709	0.0273403	0.0287037	0.118516	-1.86278	-0.983007	-1.12478	-1.40604	-1.26541	-1.97319		none
YCRX09C	-0.190592		-1.21944	0.121453	-0.107526	-0.0400712	-1.40391	-0.138653	-0.882899	-0.273643	-0.578271	-1.2749		none
YCRX10W	0.212991		-1.5718	0.145259	-0.0180241	-0.0496016	-1.73227	-0.712994	-1.12392	-0.858776	-0.991349	-1.80832		none
YCRX11W	0.104032		-1.60363	0.0737547	0.0117148	-0.171177	-1.71161	-0.855989	-0.945527	-0.710264	-0.827895	-1.78082		none
YCRX12W	-0.915743		-2.69675	0.0415003	0.30262	-0.0645716		-1.10235	-1.41538	-0.786899	-1.10114	-1.55205		none
YCRX13W	-0.381013		-2.90372	-0.205092	0.107247	0.0713994	-2.03967	-1.21791	-1.11228	-0.904871	-1.00857	-2.3625		none
YCRX14W	-0.553203		-2.00556	0.067046	0.0678505	0.0779122	-1.69195	-1.12233	-1.15267	-1.00034	-1.07651	-1.63888		none
YCRX15W	-0.357413		-1.96005	-0.0602431	-0.0263626	0.0537645	-1.4958	-0.667426	-0.83672	-0.507357	-0.672038	-1.68242		none
YCRX16C	-0.249291		-2.93384	-0.0466889	0.172199	0.283072	-2.1006	-1.42919	-1.81539	-1.42939	-1.62239	-2.12833		none
YCRX17W	-0.300648			0.0525653	-0.056659	0.0327921	-1.7504	-1.08936	-1.13749	-1.04602	-1.09175	-2.16784		none
YCRX18C	-0.667738		-2.06065	0.309521	0.116202	0.329549	-0.410367	0.0758279	0.288924	0.581029	0.434977	-0.119316		none
YCRX19W	0.15901		-1.64763	0.0121571	-0.195211	-0.139975	-1.27453	-0.234659	-0.710572	-0.206831	-0.458701	-1.26172		none
YCRX20C	0.583259		-1.28715	-0.0800605	-0.109375		-1.05404	1.40982	-0.459157	-0.193521	-0.326339	-1.01201		none
YCRX21C	-0.697506		-2.28695	0.012866	0.102367	0.107748	-2.09997	-1.28468	-1.65797	-1.25919	-1.45858	-2.01864		none
YDL009C	-0.163207	-0.13758	-2.25198	0.163737	0.211725	0.106265	-2.3213	-1.59265	-1.17357	-0.849639	-1.0116	-1.9874		none
YDL011C	-0.252717		-2.3371	0.0381382	0.279583	0.172654			-1.20431	-0.766442	-0.985378	-2.18092		none
YDL015C	-0.149797	-0.44504	-1.78671	0.272367	0.0101948	0.0837472	-1.59913	-0.437048	-1.15625	-0.17411	-0.665182	-1.55603		none
YDL016C	-0.086594		-2.10171	0.181668	-0.0341721	-0.0967902	-1.90643	-1.02699	-1.18528	-0.686823	-0.936053	-1.86882		none
YDL023C	-0.0055094		-2.16036	0.129268	-0.137346	-0.382773	-1.69304	0.462112	0.351839	0.563085	0.457462	-1.57051		none
YDL024C	-0.796206		-2.69311	-0.0433393	-0.0893109	0.0878494	-1.08612	-1.39962	-1.28445	-1.0997	-1.19208	-0.11931		none
YDL026W	0.0523652		-2.139	-0.0233253	-0.029469	0.0193149	-1.26504		-0.741749		-0.741749	-1.47335		none
YDL032W	0.115386		-1.41254	0.00374607	-0.0587149	-0.00466197	-1.12455	-0.513469	-0.874683	-0.489746	-0.682215	-1.16658		none
YDL034W	-0.046318		-1.52053	-0.0707491	-0.146743	-0.0717476	-1.27139	-0.381449		-0.634647	-0.634647	-1.22278		none
YDL035C		0.48638												none
YDL037C	-0.524249		-2.5628	0.289067	-0.737339	-0.127095	-0.751035	-1.31207	-0.542395	-1.16616	-0.854279	-0.008352		none
YDL038C														none
YDL039C	-0.364676	-2.721		-0.0371463	-0.649401				-0.692122	-0.576236	-0.634179	0.106402		none
YDL041W	-0.0460426		-2.63329		-0.0477084	0.00733442	-2.13512	-1.42722	-1.76747		-1.76747	-1.80787		none
YDL050C	-0.403585		-3.30583	-0.0305237	0.217891	0.156219	-2.65736	-2.22894		-2.13697	-2.13697	-2.86344		none
YDL061C	-0.797915	-0.39789	-2.59478	0.123868	-0.223921	0.00403894	-2.55331	-1.78607	-2.03821	-1.59023	-1.81422	-2.0845		none
YDL062W	-0.153181		-1.47457	0.133752	-0.210149	-0.0869356	-1.42695	-1.25917	-1.29484	-1.03626	-1.16555	-1.26671		none
YDL068W	0.516853		-0.516356	0.0878983	0.00710453	0.0352143	-1.31751	0.192547	-0.818405	-0.0627935	-0.440599	-1.22771		none
YDL071C	-0.632195		-3.00515	0.0351453	-0.083965	-0.0633532	-1.44144			-0.408632	-0.408632	-1.1714		none
YDL075W		-0.43517	-2.86745	0.113681	0.046279	0.111655	-2.61795	-1.84137	-1.81501	-1.59283	-1.70392	-2.44488		none
YDL081C	-0.598356	-0.27024		0.140111	-0.0809258		-2.8653		-2.53024		-2.53024	-2.92713		none
YDL082W	-0.711527	-0.51962	-2.74405	0.122573	0.108506	0.141115	-2.53946	-1.77699	-2.00664	-1.73773	-1.87218	-2.34563		none
YDL083C	-0.989526	-0.60924	-3.10383	0.0776171	-0.127476	0.114542	-2.86789	-1.97315	-2.10438	-1.73847	-1.92142	-2.61852		none
YDL094C	-0.589834		-3.16757	0.115485	-0.107968	-0.136608		-1.8761		-1.48907	-1.48907	-2.47851		none
YDL096C	-0.864565		-3.6528	-0.145295	0.0134154	-0.124494	-3.19085	-2.56094	-2.05128	-2.09507	-2.07318	-3.15104		none
YDL114W	-0.936984			0.0577859	-0.317736	-0.0470221			-1.61131	-1.61743	-1.61437			none
YDL118W	0.0019882		-1.52873	-0.0792092	-0.110529	-0.102573	-1.58001	-0.647973	-1.48463	-0.724759	-1.10469	-1.37289		none
YDL130W		-0.21833	-3.31917	0.00490463	0.00291826	0.123989	-2.88989	-2.20462	-2.35582	-2.2564	-2.30611	-2.86256		none
YDL133C-A														none
YDL136W	-0.442354	-0.66081	-2.53812	0.194239	-0.0324229	-0.0122845	-2.70072	-1.59067	-1.98521	-1.54083	-1.76302	-2.56042		none
YDL151C	-0.200693		-2.24105	0.117816	0.103802	0.19577	-2.0069	-1.27467	-1.73444	-1.51909	-1.62677	-2.14188		none
YDL152W	-0.28028		-2.65332	0.114993	0.0769987	-0.161667	-2.1225		-1.59883	-0.927489	-1.26316	-2.12932		none
YDL157C	-0.0456297	0.16793	-2.92971	0.0184446	-0.0756212	0.0684328	-3.39008	-2.21338	-2.30132	-1.72072	-2.01102	-3.09785		none
YDL158C	0.0968772	-0.036435	-1.58732	0.245991	0.0878228	0.00537652	-1.93718	-1.13433	-1.16015	-0.669269	-0.914712			none
YDL162C	-0.562279		-2.06527	-0.0218768	-0.121192	-0.0336287	-1.36236	-0.079296	-0.591252	-0.286511	-0.438882			none
YDL163W	-0.740928		-3.29315	0.0624063	-0.156464	-0.0883227	-2.46916	-1.06965	-1.32445	-1.27829	-1.30137	-2.43802		none
YDL172C	0.281032		-1.73525	0.0620244	-0.0730199	0.0727801	-1.8377	-1.02095	-1.24194	-0.695709	-0.968822	-1.73117		none
YDL184C			-0.995198		0.172122	-0.473314				-0.870767	-0.870767	-2.41471		none
YDL186W	0.0217261		-1.27619	-0.308609	0.0982479	0.260665	-1.32869	-0.749763	-1.05898	-1.10207	-1.08053	-1.0321		none
YDL187C	-0.049204		-1.19839	0.116262	-0.244482	-0.477245	-1.26183	-0.81466	-1.05231	-1.05595	-1.05413			none
YDL191W	-0.530658	-0.49653	-2.63798	0.0353722	-0.0983932	-0.0282897	-2.78061	-1.8887	-2.34795	-1.64537	-1.99666	-2.72302		none
YDL196W	-0.674087		-2.46713		0.0645093		-1.72519	-0.584456	-1.24922		-1.24922			none
YDL215C	-0.326386	-0.42169		0.00191218	0.308815	-0.0499315	-1.70109		-1.06606	-0.354009	-0.710033	-1.47626		none
YDL218W	-0.399606		-1.32377	-0.0298324	-0.124121	-0.0240195	-1.31946	-0.540665	-0.98637	-0.851835	-0.919102	-1.03607		none
YDL221W	-0.711517		-3.36678	0.0299727	0.00785729	-0.0316367	-2.38584		-1.53044	-1.06856	-1.2995	-2.29251		none
YDL227C	0.366401	0.61736		0.228302	-0.437866	-0.0180498	-2.60712	-3.25333	-1.27137	-1.65547	-1.46342	-3.88786		none
YDL228C	-0.64334		-2.85845	0.0689037	-0.133815	0.0643939	-2.68675	-1.90486		-1.66554	-1.66554	-2.16511		none
YDL229W		-0.74859												none
YDL242W	-0.712494			0.0142291	-0.0310898	0.10169	-1.49808	-0.683482		-0.896509	-0.896509	-1.26739		none
YDL243C	-0.674777		-2.09297	0.051851	0.127981	0.031664	-2.07848	-0.939588	-1.47668	-0.956003	-1.21634	-1.99067		none
YDL244W	-0.827586		-2.60422	-0.161405	-0.13607	0.0919241	-2.02543	-1.90343	-2.14465	-2.24474	-2.1947	-1.79198		none
YDL245C	-1.65875		-4.58461	0.0600054	-0.0503921	0.00202921	-1.85263		-1.84969	-1.50231	-1.676	-1.897		none
YDL246C	-1.1485		-3.5814	-0.115014	-0.0597649	0.024855	-2.4791	-2.32585	-2.09654	-2.41268	-2.25461	-2.18825		none
YDL247W	-0.778478		-2.02958	-0.0331479	-0.03869	0.00381843	-1.95405	-1.18544	-1.63319	-1.40656	-1.51988	-1.57222		none
YDL248W	-0.407949		-2.47506	0.125249	-0.177016	0.0127662	-1.76683	-1.56386	-1.4065	-1.2406	-1.32355	-1.21259		none
YDR003W	0.120501		-2.19413	-0.0831048	0.223741	0.182106	-1.21886	-0.783475	-0.873055	-0.101656	-0.487356	-1.53199		none
YDR008C	-0.691434		-3.3062	0.158981	-0.127224	-0.0973628	-1.93508	-2.98139	-1.43784	-1.40178	-1.41981	-2.01936		none
YDR009W	-1.11204		-3.342		-0.0941955	0.197473	-1.97005	-1.57886		-1.21583	-1.21583	-2.07672		none
YDR010C	-0.900087		-2.64445	-0.101492	-0.00603858	0.136325	-2.09369	-1.02566		-1.52178	-1.52178	-1.82233		none
YDR015C				-0.0112412	-0.567211		-2.52759	-1.34902	-1.8495	-1.56582	-1.70766			none
YDR018C	-0.540123				0.19996	0.143919	-1.95124	-1.29421	-1.38728	-1.11688	-1.25208	-2.03587		none
YDR019C	-0.40024	-1.5397	-2.35211	0.0814059	-0.070101	-0.0545735	-0.282702							none
YDR020C	-0.224483		-1.61408	0.1304	-0.191477	-0.0318132	-1.86316	-1.17975	-1.76246		-1.76246	-1.7186		none
YDR023W	-0.484081	-0.3296	-2.61945	0.0440856	0.0971738	0.00749289	-2.18247	-1.73785	-1.7926	-1.54913	-1.67086	-2.28919		none
YDR024W	-0.10671		-1.83753	0.0921557	-0.11931	0.315677	-1.97357							none
YDR025W	-0.820858	-0.49323	-2.82837	0.00562791	-0.113678	0.0977589	-2.60412	-1.54477		-1.61605	-1.61605	-2.46367		none
YDR029W	0.305657		-1.14618	0.0878208	0.114449	-0.275372	-1.03667	-0.223643	-0.612784	-0.0661795	-0.339482	-1.27438		none
YDR038C	-0.383522	-0.33913	-2.25532	-0.0679448	0.113667	-0.0455305	-1.58401	-1.53891	-1.39234	-0.765822	-1.07908	-1.56371		none
YDR039C	-0.404066	-0.042987	-2.27761	0.0316746	0.0259262	-0.0821276	-1.32977	-1.56102	-1.12213	-0.85675	-0.98944	-1.52996		none
YDR040C	-0.333032		-2.19315	0.00397789	0.114216	-0.011289	-1.42987	-1.44324	-1.33493	-0.661185	-0.998059	-1.53884		none
YDR042C	-0.728332		-1.64118		-0.289731	-0.0329128	-1.80729	-1.76174	-1.64981	-1.61368	-1.63175	-1.80235		none
YDR048C	-0.447584		-2.06409	0.310501	-0.0799696	-0.196837	-1.9968	-1.13267	-1.33586	-0.944016	-1.13994	-2.05909		none
YDR053W	-0.540158		-2.245	-0.0588111	0.0200019	0.0306158	-1.94428	-0.963489	-1.36957	-0.635678	-1.00262			none
YDR064W	0.0668045	-0.13236	-2.12053	0.103028	-0.0602636	-0.042173	-1.59532	-1.01393	-1.17393	-0.840853	-1.00739	-1.89023		none
YDR070C					0.0122598									none
YDR088C	-0.379188	-0.30848	-2.20902	0.00125201	-0.192458	-0.0424322	-2.0615	-1.53887	-1.7841	-1.16763	-1.47586	-1.99211		none
YDR091C	-0.323531	-0.11601	-2.43462	0.142827	-0.152335	-0.00229945		-0.660621	-1.07935	-0.301514	-0.690431	-2.07132		none
YDR092W	-1.04179	-0.098537	-2.28	0.10227	-0.0251302	0.140355	-1.17536	-1.16419	-1.27647	-0.901189	-1.08883	-1.29829		none
YDR093W	-0.210773	-0.83192	-1.76789	-0.0435651	-0.0802391	-0.18373	-1.57196	-0.638757		-0.625066	-0.625066	-1.12408		none
YDR094W	-0.312164	-0.20651		-0.0567723	-0.0263798	-0.474951	-1.66487	-0.909355	-1.27283	-0.914066	-1.09345	-1.99432		none
YDR095C	-0.595869		-2.95589	0.121063	-0.0142935	-0.11052	-2.27802		-1.85327	-1.51406	-1.68367	-2.31627		none
YDR100W	-0.18393	-0.3606	-1.97663		-0.231162			-0.385356	-1.39431	-0.296533	-0.845419			none
YDR102C	-0.29017		-1.88353	0.0186795	-0.24885	-0.214364	-1.91529	-1.12266	-1.52658	-1.09378	-1.31018	-1.37487		none
YDR106W	0.0393671		-2.1823	0.0790411	-0.0864909	-0.11235	-1.77171	-1.18256	-1.61009	-1.28392	-1.44701			none
YDR111C		0.56362			0.194498									none
YDR112W	-0.283874		-1.86801	-0.0551925	-0.0888949	-0.114222	-1.60283	-0.431993	-1.21707	-0.473487	-0.845279	-1.64511		none
YDR114C	-0.725541		-2.84776	-0.038122	-0.199042	-0.245238	-2.25863	-1.78575	-1.98844		-1.98844	-1.98915		none
YDR118W	0.0774543		-1.07729	0.0232492	-0.377013	-0.0573522	-2.16614	-0.701736	-1.60432	-0.824229	-1.21428	-2.09066		none
YDR120C	-1.17487	-0.28596	-3.41636	0.0787859	0.109878	0.113374	-2.25621	-2.05467	-0.965679	-0.33989	-0.652785	-2.24935		none
YDR121W	-0.179445		-1.53108		-0.0396778		-1.73373		-1.10716	-0.510638	-0.8089	-1.63163		none
YDR128W	-0.509355	-0.48086	-1.78572	-0.00884984	-0.264798	0.0569854	-1.68398		-1.30807	-0.707575	-1.00782	-1.18199		none
YDR133C	0.049795	-0.11631	-1.01392	-0.046103	-0.141747	0.111788	-1.26424	-0.622079	-0.953682	-0.367751	-0.660717	-1.3856		none
YDR134C	-0.419033	-0.25085	-1.61045		-0.00746905	-0.18643		-0.783637		-0.791755	-0.791755	-1.67503		none
YDR136C	-0.357412		-2.1142	0.0552669	-0.0210372	-0.0526395	-1.46953	-0.936636	-1.02309	-0.851618	-0.937352	-1.97498		none
YDR149C	-0.159736		-1.64994	-0.18215	-0.197975	-0.0696403	-1.58586	-0.72072	-1.1858	-0.492908	-0.839354	-1.44511		none
YDR154C		-0.29269			0.0600067							-1.02647		none
YDR155C	0.100362	-0.067081	-2.07709	0.149935	-0.245721	0.139787	-0.623305	-0.0259715	-0.030626	-0.0541414	-0.0423837	-0.84596		none
YDR157W	-0.245843	-0.73967	-2.21717	0.27023	-0.112961	0.202867	-1.69971	-0.660473	-1.46536	-0.874447	-1.1699	-1.39183		none
YDR182W	0.173328	-0.45903	-1.39851	-0.0514796	-0.0065865	-0.157492	-1.29552	-0.468235	-1.01141	-0.398464	-0.704937	-1.5002		none
YDR184C	-0.204881	-0.90917	-1.80155	-0.0240448	-0.148674	-0.0679072	-1.85922	-1.25783	-1.63123	-1.06865	-1.34994	-1.69343		none
YDR187C	-0.360712		-2.78552	-0.100354	0.00243095	0.103599	-1.94419	-1.43223	-1.37682	-1.23894	-1.30788	-2.31231		none
YDR193W	-0.278843		-1.42499	0.0999088	-0.0781278		-1.38685	-0.854219	-0.810766		-0.810766	-1.39597		none
YDR199W	0.0435375		-2.04282	0.0378447	0.0616721	-0.0673365	-1.97025	-1.1364	-1.25321	-0.653742	-0.953478			none
YDR203W	0.120711		-1.56351	0.0840855	0.0131197	0.068363	-1.32694	-0.505515	-0.808492	-0.435228	-0.62186	-1.43992		none
YDR209C	-0.32035	-0.41589	-2.18118	-0.108241	-0.2245	0.0489064	-2.16015	-1.8248	-1.3166	-0.829056	-1.07283	-1.04965		none
YDR215C														none
YDR218C	-0.320876		-2.06657	0.0377358	-0.125784	-0.0906017	-2.03229	-0.215333	-0.952968	-0.609127	-0.781048	-1.88795		none
YDR219C	0.160267		-0.969577	0.0404105	0.00864817	-0.0449438	-1.20338	-0.670782	-0.889357	-0.172392	-0.530874	-1.60991		none
YDR220C	-0.180942			0.0681624	-0.260955			-0.421918	-0.90025	-0.216309	-0.55828	-1.36814		none
YDR230W	0.0657809		-2.17657	-0.0431339	0.11675	0.160508	-1.66791	-1.17702	-1.12587	-0.721598	-0.923735	-2.3671		none
YDR241W	-0.48142		-2.29857	-0.12817	-0.283153	-0.280283	-2.03891	-0.949565	-1.62518		-1.62518	-1.54156		none
YDR242W	-1.09757		-2.7186	0.0890921	-0.17498	-0.0858617	-1.1671	-1.01757	-1.04836	-0.558219	-0.803289	-0.976207		none
YDR249C	0.0310506	0.093166	-1.16299	0.137282	-0.0834311	-0.296339	-1.79725	-0.776005		-0.482154	-0.482154	-1.37304		none
YDR250C	-0.104966			0.209004	-0.100249	-0.0807991	-1.60019	-0.822031	-1.15497		-1.15497	-1.18481		none
YDR261C	-1.09905	-0.41573	-3.57411	0.108638	-0.369352	-0.213324	-3.84687	-2.34959	-2.36544	-2.20354	-2.28449	-3.31073		none
YDR263C	-1.06756		-1.17798	0.0310671	-0.198423	-0.0923242	-2.63744	-1.76762	-1.4915	-1.44157	-1.46654	-2.04286		none
YDR269C	0.464458		-0.59231	0.08915	-0.00152628	-0.358328		-0.102566	-0.869754	0.230698	-0.319528	-0.828142		none
YDR271C	-0.113406		-1.3084	0.00636734	-0.0637381	-0.125068	-1.3306	-0.00791514	-0.922992	-0.398236	-0.660614	-1.14124		none
YDR274C	-2.41987		-3.16063	0.167482	0.139863	0.323162	-2.14382	-2.14451	-1.57296	-0.633622	-1.10329	-2.2388		none
YDR278C	-0.187922			-0.445968	-0.403218	-0.860152	-0.68831	0.482457	-0.478044	-0.829672	-0.653858	-0.543522		none
YDR281C	-1.49206		-3.88321	0.121172	-0.389462	-0.0719849	-1.95593		-1.7499	-1.33399	-1.54195	-1.40568		none
YDR290W	0.237697		-1.56511	0.116913	-0.219656	-0.138115		-0.606019	-1.15238	-0.87942	-1.0159	-1.68275		none
YDR310C	-0.51204	-0.44503		0.0526364	0.0600077	0.186433	-2.21581	-1.40043	-1.94386	-0.788364	-1.36611	-2.22024		none
YDR317W	-0.665683		-3.08604		-0.119644	-0.231254	-2.40391	-1.84187	-2.06806	-1.5621	-1.81508	-2.06984		none
YDR327W	-0.387193		-2.05098	-0.10806	-0.328545	-0.157249	-2.16032	-1.16885	-1.45285	-1.18147	-1.31716	-2.74214		none
YDR329C		-0.16781												none
YDR340W	-0.247186		-1.59267	0.22171	-0.00297753	-0.234651	-1.06136	-0.780159	-0.297891	0.465156	0.0836324	-1.36205		none
YDR342C		0.63738	-4.52714			0.089837		-1.43863				-1.08413		none
YDR343C	-1.4045	0.40896			0.218553							-0.833753		none
YDR344C	-0.723155		-2.31331	-0.0933906	-0.0289859	-0.0287049	-1.63485	-1.147		-1.37205	-1.37205	-1.52953		none
YDR348C		-0.20986												none
YDR349C		-0.042687												none
YDR355C	-0.679431		-3.06644	0.0793963	-0.122065		-2.28736	-1.60629		-1.18424	-1.18424	-1.98799		none
YDR360W	-0.619969		-3.15092	-0.158086	0.0971191	-0.142207	-2.11857	-1.82371	-1.91094	-1.64856	-1.77975	-2.42123		none
YDR366C	-0.524836		-2.14256	0.220081	-0.00727302	-0.10808	-1.7661	-0.60403	-0.404473	0.472925	0.0342258	-1.43103		none
YDR374C	0.194749		-0.359534		0.095655	0.0706919	-1.47518		-1.34391	-1.26238	-1.30314	-0.718685		none
YDR381W	-0.897265	-0.28463	-2.82516	-0.144892	-0.106131	-0.126428	-2.34011	-1.76449	-1.99643	-1.61581	-1.80612	-2.15257		none
YDR382W		-0.32253			-0.102811	0.199816	-3.35651	-2.57023	-2.68368		-2.68368	-3.17681		none
YDR384C	-1.22102	-0.59203	-4.40645	-0.162429	0.417246	0.215041	-1.93129	-3.08438	-1.55336	-1.27564	-1.4145	-1.73351		none
YDR393W		-0.048938												none
YDR396W	-0.659757		-1.87637	-0.00557791	-0.0823305	0.23573	-0.720913	-0.275494	-0.470124	-0.142577	-0.306351	-0.851528		none
YDR401W	-0.716371		-1.86881	-0.0877074	-0.0889586	-0.149775	-1.51232	-0.31184	-1.05642	-0.512833	-0.784629	-1.67853		none
YDR402C	-0.777948		-1.75595	0.131031	-0.175255	-0.130064	-1.39309	-0.823731	-0.921874	-0.730974	-0.826424	-1.58493		none
YDR406W	-0.612008		-3.21316	-0.219273	0.0392199	-0.00647265	-1.19792	-1.68023	-1.00288	-1.2855	-1.14419	-1.31588		none
YDR413C	-0.142389		-2.29984	0.108119	0.167739	0.0373687	-1.94731	-0.970134	-1.49607	-0.697167	-1.09662			none
YDR414C	-0.500654		-1.56287	0.0190934	-0.180913	0.0304463	-2.09476	-0.164639	-1.61271	-0.752283	-1.1825	-2.08782		none
YDR417C			-3.25552	-0.104763	-0.0556171	0.0675393	-2.76836	-1.98595	-2.13208	-2.01245	-2.07226	-2.64131		none
YDR418W	-0.680424	-0.4084			0.0667665									none
YDR426C	0.0393729		-1.2486	0.137927	0.169087	0.143721	-1.83931	-0.268886	-0.908472	-0.142889	-0.52568	-1.40188		none
YDR431W	0.0177267			-0.0463448	0.037937	-0.122143	-0.976687	-0.0818737	-0.507745	0.134606	-0.186569	-1.27144		none
YDR433W	-0.451079	-0.3013	-3.02052	-0.0725752	-0.00961966	-0.0860577	-1.78324	-1.33784	-1.28909	-1.28469	-1.28689	-2.14547		none
YDR438W	-0.446125		-1.73546	-0.0200783	-0.061046	-0.0277035	-1.30454	-0.472862	-1.05581	-0.510524	-0.783165	-1.30162		none
YDR439W	-0.158246		-1.45379	0.0972615	0.00821895		-1.58481	-0.728747	-1.00724	-0.578716	-0.792977	-1.63327		none
YDR442W	-0.284713		-1.98929	0.0222645	-0.131407	-0.194606	-1.81195	-0.513123	-1.18227	-0.763886	-0.97308	-1.69387		none
YDR445C	-0.0011401		-1.11186	0.183258	0.206151	0.225962	-1.73456		-0.75149	-0.475187	-0.613338	-1.58679		none
YDR446W	-0.247955		-1.36976	0.0697377	-0.100174	-0.178744	-1.51809	-0.534865	-0.880232		-0.880232	-1.1599		none
YDR447C		-0.21503		0.0485565	-0.240881	-0.169749			-2.44747	-1.15688	-1.80217			none
YDR450W	-0.536119	-0.13088			-0.163528	0.035722								none
YDR455C	-0.0569595		-1.83945	0.213498	-0.00170755	0.0774394	-1.55037	-1.03312	-1.19601	-0.742501	-0.969253	-1.045		none
YDR461W	1.80704			0.116784	-0.0165863		0.511413	-0.222951	-1.03731	0.412814	-0.312246	0.485093		none
YDR467C	0.0200169		-1.09593	0.199926	0.0461568	0.0322566	-1.25965	-0.540226	-0.984572	-0.224663	-0.604618	-0.488224		none
YDR471W	-0.886273	-0.39462	-2.9418	0.143755	-0.345309	0.0322511	-2.73394	-1.78278	-1.97434	-1.61814	-1.79624	-2.51337		none
YDR474C	-0.774297	-0.14679	-2.92988	0.0614892	-0.151003	-0.12214	-1.91827		-0.696007	-0.962839	-0.829423	-2.08812		none
YDR488C	-1.14496		-3.94628		-0.0474443	-0.0260879		-2.38529		-2.08013	-2.08013	-3.49648		none
YDR491C	-0.858139		-3.79588	0.0488723	0.0404454	0.10926	-2.83097	-1.71038	-0.98433	-0.912085	-0.948207	-3.00636		none
YDR495C			-1.55508	0.086956	0.00781733		-0.949537		-0.963193	-0.403886	-0.683539			none
YDR500C	-0.561813	-0.17042	-2.20263	0.156898	-0.0972405	0.069028	-2.34307	-1.37655	-1.70997	-1.42692	-1.56845	-2.14307		none
YDR505C	0.0178204	0.26212	-2.08492	0.172238	-0.0492051	0.0641497	-1.47168	-0.901301	-0.656757	-0.357608	-0.507182	-1.85321		none
YDR509W	-0.295851		-2.81607	0.0375641	0.0977203	-0.30501	-1.14628	-1.95757	-0.985661	-0.903824	-0.944742	-1.11476		none
YDR521W	-0.0728896		-1.14191	-0.053412	-0.114191	0.0780491	-1.21857	-0.483542		-0.254934	-0.254934	-1.17612		none
YDR522C	-0.0222956		-1.18597	0.0511091	-0.150713	-0.130204	-1.36088	-0.211033	-0.985209	-0.422394	-0.703801	-1.33055		none
YDR523C	-0.438912		-1.11211	0.0405855	0.0110008	-0.215951	-1.56995	-0.801208	-1.13163	-0.784393	-0.958013	-1.16909		none
YDR525W	-0.135104		-1.49575	0.069192	0.0651757	-0.0447165	-1.57094	-0.629483	-1.31346		-1.31346	-1.02647		none
YDR526C	0.0841671		-1.92698	-0.0877319	-0.0949162	0.0132969	-2.55118		-1.47757	-1.15524	-1.3164	-2.31862		none
YDR527W	0.04456	0.58803	-1.64142	-0.0228267	-0.105677	-0.129739	-2.68009	-0.893541	-0.821378	-0.583667	-0.702523	-2.47697		none
YDR534C	-0.739758	-0.82953	-2.30743	0.0321378	0.0598829	0.0913757	-1.89509	-1.24823	-1.59827	-1.664	-1.63113	-1.54025		none
YDR535C	-0.585015		-2.52869	0.0302262	-0.0810583	-0.0338356	-1.75003	-1.31953	-1.25262	-0.812846	-1.03273	-1.40083		none
YDR537C	-0.500691		-2.1426	0.0349943	0.0242647	0.125094	-2.02454	-1.41279	-1.39386	-1.19772	-1.29579	-1.69442		none
YDR539W	-2.34748		-3.89449	-0.135655	-0.0981971	-0.0325709	-2.59155	-2.73656	-2.18402	-1.86777	-2.02589	-2.77712		none
YDR542W	-1.12376	-0.43644	-2.04602	0.0468392	-0.0214525	0.119473	-1.80829	-1.4814	-1.68143	-1.68296	-1.68219	-1.24804		none
YDR543C	-0.0196319		-0.17629	0.152449	-0.105644	0.254111	-1.84414	-0.780932	-1.42606	-0.750565	-1.08831	-1.56561		none
YDR544C	0.113389		-0.431927	0.153903	0.00645266	0.127195	-1.54176	-0.482533	-1.02626	-0.731726	-0.878994	-1.49407		none
YDR545W		-0.39737	-3.71268	-0.0271456	0.156673	-0.0173657	-2.56024	-2.88936	-1.72312	-1.80959	-1.76636	-2.85517		none
YEL008W	-0.213099		-1.20313	0.00662113	-0.134083	-0.0959525	-0.914894	0.197783		-0.188021	-0.188021	-0.759824		none
YEL010W	-0.52929		-2.52152	-0.0274339	-0.146652	-0.165812	-1.65923	-0.803495	-1.29179	-0.815665	-1.05373	-1.60038		none
YEL014C	-0.149451		-1.49887	0.0468047	0.0255563	0.0685068	-1.73379			-0.517412	-0.517412	-1.85625		none
YEL020C	0.0772323	-0.045056	-1.63608	0.193986	-0.08899	-0.0518536	-1.42236	-0.234665	-0.872239	-0.452884	-0.662561	-1.83154		none
YEL028W	-0.677794		-1.80524		-0.0920685	0.118573	-2.66783	-1.26354	-1.94766	-1.57926	-1.76346	-1.87686		none
YEL033W	-0.150138		-2.17665	0.319679	-0.211351	-0.0656943	-0.982941	-0.569887	-0.745978	-0.242969	-0.494474	-0.974988		none
YEL034W	-0.284425	-0.0077238				-0.158582	-1.16506			-0.156499	-0.156499	-0.945583		none
YEL035C	-0.268977		-1.16218	0.00786056	-0.11135	0.255039	-0.656011	-0.535276	-0.547971	-0.0168309	-0.282401			none
YEL045C	-0.637753		-2.28519	0.305914	-0.113801	0.0584122	-2.04344	-0.780303	-0.898619	-0.541599	-0.720109	-1.48769		none
YEL046C		-0.97598	-3.25455	0.0315843	-0.0909073	0.0835443	-2.0524	-0.978704	-0.879166	-0.751245	-0.815205	-1.49141		none
YEL049W	-0.994483		-1.84341	0.105846	-0.115521	0.058446	-1.94954	-1.85049	-1.75682	-1.66731	-1.71207			none
YEL054C	-0.503006	-0.32359	-2.87155	-0.0744868	0.0998898	0.0352932	-2.48656	-1.86029	-1.99232		-1.99232	-2.43244		none
YEL059W	-0.717318		-1.90219	-0.291795	0.0498557	0.407736	-1.48428	-0.48588	-0.887538	-0.121465	-0.504501	-0.64586		none
YEL068C	-0.171129		-2.45168	0.0241762	0.0184068	0.155237	-1.95122	-1.11473	-1.8632	-0.912457	-1.38783	-2.36809		none
YEL069C	-1.07595		-2.89889	-0.116051	0.15893	-0.078843	-1.7012	-1.22699	-1.622	-0.916124	-1.26906	-1.84667		none
YEL070W	-0.654191		-2.18113	-0.264295	0.335205	0.0263224	-1.34593	-1.04244	-1.38959	-1.08697	-1.23828	-1.40551		none
YEL073C	-0.579609		-1.58141	-0.00347641	0.00334654	0.0544743	-1.28824	-1.16767	-1.45236	-0.771457	-1.11191	-1.00263		none
YEL074W	-0.791718		-2.37608	0.0453659	-0.00534412	0.0815008	-1.97189	-1.6614	-1.51276	-1.53355	-1.52315	-1.72302		none
YEL075C	-0.691877		-3.06543	-0.2993	-0.0759633	-0.00714965	-2.60482	-2.32854	-1.77973	-1.67373	-1.72673	-2.36489		none
YEL076C	-0.714288		-3.01628	-0.0167733	0.0833918	-0.108098	-2.42571	-2.12233	-1.70928	-1.74173	-1.72551	-2.36316		none
YEL076C-A	-0.647807		-2.863	-0.335786	-0.0140782	-0.00670512	-2.66228	-2.38155	-1.68128	-1.54737	-1.61432	-2.34451		none
YEL076W-C	-0.719431		-3.12208	-0.146312	0.0214249	0.0337814	-2.57878	-2.26974	-1.78648	-1.79851	-1.79249	-2.37503		none
YEL077C	-0.698605	-0.50656	-3.68476	-0.109783	0.00215583	-0.205673	-2.9627	-2.4719	-2.06497	-1.75025	-1.90761	-2.71744		none
YER001W	-1.40501	-0.91825	-4.89342	0.216195	-0.199832	-0.112354	-2.88635	-2.10164	-1.18932	-0.95378	-1.07155	-3.39101		none
YER003C	-1.27576	-0.013189	-4.84921	0.0254198	-0.126334	-0.0524645	-3.76647	-3.2848	-1.88521	-1.58711	-1.73616	-3.30991		none
YER011W	-1.00392	-0.2126	-2.18618		-0.831393	0.259874	-2.16366	0.194192	-1.48185	-1.90397	-1.69291	-1.87613		none
YER034W	0.158995		-2.23531	-0.0630026	-0.0062065	0.17039	-1.37227	-0.363447	-0.814693	-0.163098	-0.488895	-1.91963		none
YER035W	-0.533788		-2.3117	-0.00892862	-0.0540967	0.0204562	-0.290061	-1.13511	-0.239956	0.218781	-0.0105875	0.04872		none
YER039C	0.0188604		-0.944252		-0.0297342	-0.0256392	-1.51495	0.191494	-0.688191	0.0579694	-0.315111	-1.28996		none
YER040W	-0.33128		-1.2181	-0.157934	-0.168378	0.0354636	-1.42566	0.0432765	-0.991437	-0.0280052	-0.509721	-1.1048		none
YER056C-A	-0.725312		-2.86033	0.106155	-0.0994102	0.113458	-2.89968	-1.65363	-2.15132	-1.66834	-1.90983	-2.61373		none
YER060W-A					-0.0131486									none
YER066C-A			-2.35	0.110171	0.782906	0.0676118	-0.801015	0.586034	-1.31037	0.00564478	-0.652363			none
YER074W	-0.620014	-0.12327	-2.96644	0.0742717	-0.0545607		-2.81583		-2.04056		-2.04056	-2.68677		none
YER081W	2.32272	4.31	1.23534	-0.0217309	0.18993	0.0616241	-0.826893	1.17468	-0.549079	0.32053	-0.114274	-0.21371		none
YER084W	-0.0908457				-0.14393	-0.0451909	-1.80372	0.11221	-1.0772	-0.726342	-0.901773	-1.38877		none
YER085C	-0.633474		-2.49161	-0.0813306	0.284074	-0.123092			-1.59993	-0.748755	-1.17434	-1.82414		none
YER087C-A	-0.560114		-2.68977	0.17277	-0.108243	-0.0482873	-2.64513	-1.74568	-1.82254	-1.36071	-1.59162	-2.61163		none
YER089C	-0.854207		-3.13729	-0.0583221	-0.00157404	0.28892	-2.26604	-1.69768	-2.00307	-1.78541	-1.89424	-2.32914		none
YER098W	-0.349878		-2.98262	0.00612528	0.0923455	-0.165771			-1.5289	-0.962324	-1.24561			none
YER102W		-0.19792												none
YER106W	-0.3515		-1.32827	0.0582303	-0.0892418	-0.200937	-1.19929		-1.00171	-0.551439	-0.776575			none
YER108C	-0.474936		-2.2653	-0.0153456	-0.0837583	0.0569474	-1.99867	-1.21129	-1.68815	-1.02588	-1.35702	-2.17138		none
YER116C	0.161314		-1.12141	-0.0299708	0.163033	0.0971282	-0.942111	-0.0594413	-0.846494	-0.00794385	-0.427219	-1.0479		none
YER117W	-0.911284	-0.15734	-3.3966	0.169091	-0.29461	-0.169833	-3.27268	-2.37806	-2.39418	-2.07008	-2.23213	-3.11088		none
YER119C	-0.0332662		-2.24146	-0.0176535	0.0083439	0.0254079	-1.68699	-0.573766	-0.719606	-0.914353	-0.816979	-1.88178		none
YER119C-A	-0.643221		-2.39912	0.149838	-0.0503039	0.0169066		-1.32576	-1.52782	-1.16377	-1.34579	-2.13386		none
YER131W		-0.43645			0.0971208	0.0286198								none
YER135C	-0.455097		-2.35096	0.110082	0.13649	0.232584	-1.58863		-1.1934	-0.393454	-0.793428	-1.95029		none
YER138C		-0.54649												none
YER152C	-0.618097	-0.23757	-3.03823	-0.0427019	0.0695309	0.140527	-1.0584	-1.70441	-1.07717	-0.675992	-0.876581	-0.043608		none
YER160C	-0.73541	-0.5393	-2.11851	0.139615	0.0013952	-0.0831294	-1.24904	-0.368604		0.297317	0.297317	-1.60384		none
YER177W		-0.12817												none
YER180C	-0.653257		-3.10928	0.0368236	-0.0147454	0.00404779	-1.83241	-1.89709	-1.58498	-1.0995	-1.34224	-1.9731		none
YER181C	-0.223317		-1.78256	0.111805	0.0352898	-0.101014	-1.02982	-0.407084	-0.299829	0.119401	-0.090214	-1.11368		none
YER185W	-1.21338		-2.19191	-0.0690012	0.0122878	-0.0417607	-2.06258	-1.06672		-0.46888	-0.46888			none
YER188W	-1.30659		-2.74293	-0.0427359	-0.254042	-0.15231	-1.65945	-0.959519	-0.991136	-0.846893	-0.919014	-1.33718		none
YER189W	-0.693723		-3.13875	-0.178625	-0.00904358	-0.0380652	-2.39395	-2.37494	-1.94377	-1.77493	-1.85935	-2.40198		none
YER190W		-0.44784			0.157029									none
YFL-TYA			-2.38037		-0.136916		-1.89038							none
YFL-TYB														none
YFL002W-A								-0.593375						none
YFL006W	-0.0292868	0.14861	-2.58576	-0.0589124	-0.132567	-0.22373	-2.12584	-1.51974	-1.75745	-1.81655	-1.787	-2.30069		none
YFL011W	-0.644048			-0.055747	0.165792	0.0501201	-2.03531	-1.15594	-1.60127	-1.2222	-1.41173	-2.19023		none
YFL011W-A	-0.0352411		-2.17205	0.0546917	0.0617431	0.0650895	-1.94765	-1.18976	-1.44393	-1.10859	-1.27626	-2.25798		none
YFL012W	-0.919665		-2.30427	0.0063672	-0.0155561		-2.09255		-1.4088		-1.4088			none
YFL013W-A	0.0664522		-1.0378	-0.0352813	0.0791931	-0.162573	-1.14583		-0.878555	-0.117254	-0.497904	-1.36418		none
YFL014W		-0.44724												none
YFL015C	0.00846			-0.0623235	-0.190479	-1.01953	-1.21106	-0.0617821	-0.78228	-0.419295	-0.600787	-1.05841		none
YFL018W-A	-0.0757683		-2.18948	0.00276925	0.142939	0.296199	-1.7006	-0.421244	-1.27443	-0.63593	-0.95518	-1.92127		none
YFL019C	-0.519334		-1.98326	0.109804	-0.0428209	-0.0261891	-1.18548	-0.190584	-1.00747	-0.360509	-0.683987	-1.29441		none
YFL020C	-0.965547	0.14261	-1.84726	0.00813895	0.00842977	0.126897	-1.45225	-0.919108	-1.42757	-1.25592	-1.34175	-0.840698		none
YFL024C					-0.0922619									none
YFL029C														none
YFL031W	-0.299851	0.1601	-2.45662	-0.037545	-0.0226606	-0.0213736	-1.60134		-0.826325	-0.490984	-0.658655	-1.03256		none
YFL033C				-0.111557	0.15987	-0.490675								none
YFL034C-A	-0.415465		-1.68129	0.0146617	-0.520954	0.0596898	-2.33488	-0.98968	-1.79371	-1.40432	-1.59901			none
YFL035C	-0.304301	-0.17159	-1.33578	0.0157097	-0.00235219	-0.0699493	-1.42832	-0.501689	-0.765702	-0.343873	-0.554787	-1.2601		none
YFL035C-A	-0.486953	-0.53003	-1.6134	0.00990531	-0.510968	0.180834	-2.33316	-0.953032	-1.76442	-1.52287	-1.64364	-1.80917		none
YFL035C-B	-0.731266		-2.25161	-0.00678015	-0.353512	0.0844759	-2.3848	-1.59706	-1.98256	-1.80734	-1.89495	-2.24969		none
YFL040W	-1.11563		-3.09775	-0.0912392	0.0694632	0.0479699	-1.36131	-0.779463	-1.84146	-0.831055	-1.33626	-1.13188		none
YFL043C	0.0667982	0.024108	-1.67653	-0.0764067	0.115068	0.0325299	-1.01283		-0.625494	-0.352054	-0.488774	-1.04812		none
YFL045C	-1.02638	-0.14716	-4.10747	-0.0104579	-0.119241	-0.0069552	-3.08923	-3.32587	-1.65596	-1.18013	-1.41805	-2.84427		none
YFL051C	-0.477172		-2.11771	-0.300464	0.355686	-0.00407331	-1.1732	-0.598913	-0.995053	-0.8416	-0.918326	-0.987317		none
YFL052W	-0.598441		-2.47538	-0.0105647	0.685574	0.0562699	-1.72797		-1.57933		-1.57933	-0.963452		none
YFL053W			-1.97007		-0.00106558		-1.06025	-0.52372						none
YFL057C	-0.676367	-0.092239	-1.91538	-0.014425	0.0240098	0.101633	-1.9013	-1.2794		-1.30865	-1.30865	-1.12946		none
YFL058W	-0.893796		-2.56993	-0.270828	-0.00622743	0.117696	-1.83807	-1.88707	-2.09407	-2.23967	-2.16687	-1.56266		none
YFL059W	-1.80949		-4.93663	-0.151094	-0.0854333	0.122708	-3.4936		-2.67826	-2.46632	-2.57229	-3.0911		none
YFL060C	-1.3553		-3.97962	-0.0254579	-0.039642	0.068425	-3.12872	-1.93819	-2.1265	-1.40994	-1.76822	-2.58366		none
YFL061W	-1.1846		-3.20221	-0.0534538	-0.0756463	0.0342737	-1.75887	-1.3676	-1.63778	-1.49329	-1.56554	-1.34025		none
YFL062W	-0.4196	-0.38171	-2.48679	0.125536	-0.149529	-0.0245168	-1.78383	-1.43825	-1.61898	-1.28738	-1.45318			none
YFL063W	0.0421354		-0.39345			-0.0917161	-1.75143	-0.195943	-1.37928	-0.837149	-1.10822	-1.0394		none
YFL064C	-0.779891		-3.15637	-0.124349	-0.00372155	-0.0656429	-2.23203	-2.17527	-1.68541	-1.77654	-1.73098	-1.98587		none
YFL065C	-0.679103		-2.96785	-0.168824	-0.0175043	-0.0805526	-2.38309	-2.33158	-1.71136	-1.68838	-1.69987	-2.297		none
YFL066C		-0.23605	-3.86122	-0.104627	0.147693	-0.0562855	-2.83218		-2.07041	-1.96271	-2.01656	-2.82736		none
YFL067W			-3.14263	-0.313915	0.166299	0.225571	-2.85419	-2.31263	-2.01092	-1.72784	-1.86938	-2.55903		none
YFL068W	-0.590315		-3.58564	0.0197467	0.0984204	-0.0331092	-2.68027	-2.64927	-2.00266	-1.70984	-1.85625	-2.74395		none
YFR009W		0.045383	-2.16992	0.0651222	-0.0789825				-1.58803	-0.770861	-1.17945	-1.91298		none
YFR012W	-1.27735		-3.42267	-0.0605727	-0.00946687		-2.01397	-1.58119	-1.47806	-1.57598	-1.52702	-1.73412		none
YFR020W	-0.548213	-0.070807	-1.56204	0.0348226	0.00559316	0.0764454	-1.39266	-0.767298	-1.25467	-0.785049	-1.01986	-1.2755		none
YFR022W	-1.55921		-2.90529	0.106841	-0.103185	-0.0410174	-2.22382	-1.32971	-1.2499	-1.4172	-1.33355	-2.43849		none
YFR023W	-0.872351		-3.27336	0.00439988	-0.00934667	0.0205179			-1.43426	-1.43632	-1.43529	-1.37502		none
YFR024C	-0.0405885	0.044199	-2.16041	-0.11588	-0.117363	-0.0201985	-2.25292	-1.05697	-1.5442	-1.20279	-1.3735	-1.63532		none
YFR031C-A	-0.814326		-3.1772		-0.129575	0.102103	-3.03263			-1.95154	-1.95154	-2.76129		none
YFR032C				-0.172264	-0.0668605		-1.69163	-0.1913	-0.713644		-0.713644	-1.26763		none
YFR032C-A	-0.191918		-3.01045	-0.198258	-0.00826776	0.0491901	-3.30833	-2.04071	-2.64912	-1.95659	-2.30286			none
YFR034C	0.0072987	-0.60777		-0.122917	0.0144067	0.313709	-1.86875	-0.611604	-0.931972	-0.361143	-0.646558	-1.82492		none
YFR046C					0.435239									none
YFR053C	-0.315717	0.11477	-2.64192	0.237302	0.695895	0.0938957	-0.01591	1.49909	-0.970961	0.0911081	-0.439927	-0.715308		none
YFR054C	-0.726393		-2.93952		-0.167146		-1.903	-0.636971	-1.23996	-1.8346	-1.53728	-0.876183		none
YFR056C	-1.40738		-3.94449		-0.426304	-0.184148	-1.59709	-1.22021	-1.13094	-0.494929	-0.812935	-1.55366		none
YFR057W	-1.67259			-0.413448	-0.254749		-1.18957							none
YGL006W	-0.473874		-2.41898	0.0445411	0.161858	-0.191107	-0.964319		-0.326644	0.260027	-0.0333087	-0.355691		none
YGL007W	-0.0951019		-0.265964	-0.0981922	-0.29005	-0.0209742	-1.4637		-0.599814	-0.0405305	-0.320172	-1.31135		none
YGL015C	-0.0121447		-1.31004	-0.0373525	-0.636115	-0.0728178	-1.73238		-1.12189	-1.37646	-1.24918	-1.04789		none
YGL024W	-0.154392		-1.7431	0.116839	0.0470142	-0.102611	-1.45156		-0.887489	-0.297896	-0.592692	-1.70817		none
YGL031C		-0.39988			0.0967794									none
YGL032C	0.0753357			0.192348	0.0867634	-0.0980902	1.84693	-0.585035	-0.341917	-0.10117	-0.221544	2.32976		none
YGL033W	-0.725321			-0.3721	-0.237933	-0.131022	-2.03281			-1.32316	-1.32316			none
YGL034C					-0.386434									none
YGL041C	-0.181073		-1.90853	-0.131719	-0.0284016	-0.00613297	-2.10659	-0.627997	-1.14328	-0.471905	-0.807593	-2.35583		none
YGL042C	0.264119		-1.16318	0.0687032	0.0057124	-0.000286582	-1.4477	-0.697865	-1.0276	-0.636853	-0.832226	-1.72318		none
YGL046W	-0.210086		-1.39242	-0.0551344	-0.116747	-0.135451	-0.105129	-0.516541	0.107291	0.726311	0.416801	0.261815		none
YGL051W	-0.439822		-3.28808	0.124487	-0.23623	0.0432926	-1.9173	-1.69053	-1.83875	-1.09926	-1.469	-2.07912		none
YGL052W	-0.505625		-2.72501	0.0890864	-0.0686606	-1.05182	-1.87022	-1.50028	-1.58904	-0.919281	-1.25416	-1.104		none
YGL053W	-0.529724		-2.67374	0.0855061	-0.0465263	0.0711884	-1.90532	-1.42632	-1.57501	-1.16947	-1.37224	-1.62255		none
YGL055W	-1.00285	-0.63576		0.0529871	0.353319	0.125336		-2.67694						none
YGL063W	-1.09222		-3.02801	-0.23968	0.055998	0.0240857	-2.44456	-0.615151	-1.71701	-1.41946	-1.56823	-2.27079		none
YGL069C	-0.27274		-2.01445	-0.0280415	-0.609705	-0.12491	-2.01128	-0.958115	-1.39094	-0.700982	-1.04596	-2.03931		none
YGL072C	0.305704		-0.842754	-0.00697567	0.0478959	0.0856731	-1.07483	-0.347677	-0.899704	-0.202243	-0.550973	-0.607167		none
YGL074C	0.16592		-1.4563	-0.0935775	0.0193668	0.01842	-1.21316	-0.54976	-0.777389	-0.447595	-0.612492	-1.2772		none
YGL076C	-0.642403	-0.22559	-2.35516	0.0088299	-0.0751096	0.0292554	-2.71721		-2.13829	-1.75604	-1.94716	-2.51619		none
YGL088W	-0.270364	0.61504	-2.08775	0.129499	-0.628844	-0.801725	-2.01985	-1.15875		-1.19308	-1.19308	-2.16152		none
YGL089C	-1.54159	-0.52486	-3.18478	0.0167123	0.499761	0.422384	-4.00907	-3.00251	-3.05027	-3.09161	-3.07094	-5.04351		none
YGL096W	-1.30317		-1.12557	0.229825	-0.360111	-0.0337911	-0.650603	-0.697052	-1.49275	-1.38449	-1.43862	-0.858479		none
YGL102C														none
YGL103W	-0.0599053	-0.10484	-1.73668	-0.111832	-0.419205	-0.0868634	-2.54575	-1.48026	-1.91882	-1.2431	-1.58096	-1.56013		none
YGL109W	0.313268		-1.4754	0.025025	-0.100195	0.17938	-1.48618	-0.287193	-0.948343	-0.536428	-0.742385	-1.5005		none
YGL118C	-0.209393		-1.9877	0.00661769	-0.250725		-1.87372	-0.317893	-1.21419	-0.605771	-0.909979			none
YGL123W	-0.62842	-0.32132	-3.13877	-0.00138036	-0.0948788	0.128699	-3.22737		-2.51261		-2.51261	-2.80606		none
YGL126W	-1.06538	-0.94505	-3.59934	-0.204388	-0.159357	0.0729908	-3.02576	-1.98727	-1.96274	-2.00199	-1.98236	-3.12179		none
YGL128C	-0.421876		-2.11823	-0.0314047	-0.0865481	0.107437	-1.80423	-0.895358	-1.2476	-0.633361	-0.940479	-1.94522		none
YGL132W	0.159641		-1.30029	0.0569402	-0.125878	-0.117707	-1.54856	-0.689907	-1.17759	-0.916335	-1.04697			none
YGL133W	-0.196548		-1.7702	0.085838	-0.0692424	-0.249399	-1.38297	-0.729925	-0.856299	-0.600606	-0.728453	-1.20645		none
YGL135W	-0.550252	-0.27963			-0.12123									none
YGL138C	-0.301782		-1.59641	0.0323579	-0.151647	-0.118541	-1.31755	-0.0258311	-0.882213	-0.256595	-0.569404			none
YGL146C	-0.789311			-0.0708448	0.297159	0.260111	-1.74124	-1.45414	-1.49478	-1.24405	-1.36941	-2.0276		none
YGL147C	-0.622798	-0.36682			-0.00850835									none
YGL149W	-0.237567		-3.08948	-0.0870759	0.255598	-0.193986	-2.07274	-1.33689	-1.48527	-0.876537	-1.18091			none
YGL152C	-0.101622		-1.88363	-0.0260227	-0.101512	0.0759984	-1.64349	-0.653447		-0.408391	-0.408391	-2.01575		none
YGL163C														none
YGL164C	-0.0128843	-0.36816	-1.69067	-0.0711663	0.0392652	-0.0880815	-1.68515	-0.735216	-1.20421	-0.463047	-0.833627	-1.86435		none
YGL165C	-0.444814		-2.48916	-0.0757227	-0.156568	-0.0721924	-2.27133	-1.30258	-1.39956	-0.620812	-1.01019	-2.2005		none
YGL167C		-0.12821			-0.146103	0.162281	-1.55344	-0.378616		-0.416074	-0.416074			none
YGL168W	-0.299944		-1.98201	0.190194	0.0193203	-0.0734846	-1.95095	-1.69067	-1.43704	-1.1777	-1.30737	-1.82248		none
YGL170C	-0.507405		-1.97805		-0.0944451	-0.0464215	-1.659	-1.33439	-1.42172	-1.10158	-1.26165	-1.57256		none
YGL177W	-0.167941		-1.75122	0.201397	0.159431	-0.0085785	-1.63798			-0.767203	-0.767203	-1.56679		none
YGL179C	-1.53162	0.047646	-3.76513	0.18083	-0.31842	-0.114054	-2.0259		-1.25177	-1.21847	-1.23512	-2.03539		none
YGL182C	-0.25127		-2.01232	0.113364	-0.223032		-1.75434	-1.01867	-1.33533	-0.661728	-0.998529			none
YGL183C	0.0698868		-0.756856	-0.0514114	0.0395171	-0.229031	-2.02887		-1.1535	-0.238818	-0.696159	-0.806767		none
YGL187C	-0.118157	-0.33198	-1.77534	0.0953725	-0.283731	0.0667997	-2.37244	-1.2055	-1.06566	-0.929047	-0.997356	-2.72533		none
YGL188C	0.332573		-1.45904	0.340246	-0.147188	-0.192587	-2.08272	-0.860637	-1.08214	-0.419962	-0.75105	-2.23431		none
YGL189C		-0.27367												none
YGL196W	-1.73131	-0.19747	-3.70137	0.00665669	-0.3431	-0.0659982	-2.51677	-1.67959	-1.74408	-1.62598	-1.68503	-2.38364		none
YGL199C	-0.0571766		-1.93744	-0.104342	0.197093	0.297112	-1.15643	-0.581692	-0.742762	-0.205189	-0.473975	-1.25712		none
YGL204C	-0.786325		-3.85518		-0.336931	-0.172796		-2.61354		-2.50717	-2.50717			none
YGL214W	0.246595		-1.38855	0.111114	0.1062	0.154776	-1.43155	-0.614083	-0.834922	-0.477878	-0.6564	-0.821654		none
YGL217C	-0.337187		-2.24697	-0.0216835	-0.00471225	-0.0890913	-1.89324	-1.14888	-1.32544	-0.942603	-1.13402	-1.96058		none
YGL218W			-1.36191	0.14586	0.0773833	0.155545	-1.25837	-0.354094	-0.732865	-0.303142	-0.518004	-1.35137		none
YGL227W	0.0239199		-1.7928	-0.0377571	0.0147104	-0.0564623	-1.97271		-1.3497	-0.704777	-1.02724	-1.5986		none
YGL235W	-0.491032		-2.24713	-0.12457	0.0708159	-0.0182585	-1.81312	-0.923708	-1.27462	-0.984151	-1.12939	-1.42168		none
YGL239C	-0.0812827		-1.34436	-0.174536	-0.221092	-0.116203	-1.44504	-0.446914		-0.752092	-0.752092	-1.36557		none
YGL255W		-0.7277	-4.11904	-1.12832	0.591711	-0.547546	-1.98511		-2.01552	-1.03854	-1.52703	-1.90894		none
YGL258W	-0.685449		-2.09174	-0.0427722	-0.0977953	-0.135157	-1.48237	-1.0952	-1.29353	-1.217	-1.25526	-1.53612		none
YGL259W	-0.091602		-1.33056	0.0663637	-0.073515	-0.168384	-1.59146	-0.204674	-1.18845	-0.333094	-0.76077	-1.55816		none
YGL260W			-1.28447	0.119129	-0.0195984			-1.20653	-1.41128	-1.25324	-1.33226			none
YGL261C	-1.16133	-0.467	-2.00748	-0.0198917	-0.0850795	0.0570175	-1.91002	-1.67463	-1.72067	-1.72506	-1.72286	-1.13397		none
YGL262W	-0.325826		-1.75669	0.138036	-0.167793	0.0444994	-1.38382	-0.0467512		-0.00568448	-0.00568448			none
YGL263W	-0.380789		-2.29287	-0.0586805	-0.106208		-1.53419	0.0307789	-1.43877	0.0727281	-0.683021			none
YGR011W	-0.409714		-2.20223	-0.0853923	-0.038857	0.0320531	-1.75419	-1.21424	-1.40946	-0.991934	-1.20069	-2.12186		none
YGR018C	-0.514414		-2.82333	-0.0458038	-0.0335358	0.0909885	-2.35286	-1.37987	-1.71484	-1.11793	-1.41638	-2.43712		none
YGR022C	-0.396899		-2.21659	0.160932	0.214582	0.129754	-2.0048		-1.16271	-0.604208	-0.883461	-1.63354		none
YGR025W	-0.0242939		-2.49162	0.240261	0.111538	-0.139231		-1.15327	-1.51732	-1.00942	-1.26337	-2.18971		none
YGR026W	-0.110325	0.15871	-2.53076	-0.0122465	-0.0189648	0.116878	-2.14556	-1.566	-1.41102	-1.18288	-1.29695	-2.34493		none
YGR027C		0.44151												none
YGR034W	-0.732131	-0.31002	-3.10504	-0.0128976	-0.159652	0.023155	-2.80609	-2.08605	-2.16788	-1.92144	-2.04466	-2.64641		none
YGR039W	-0.923356			0.0314358	-0.119799	-0.241626	-2.27472	-1.87626	-1.68269	-1.53831	-1.6105	-1.82944		none
YGR044C	-0.890538	-1.1211	-3.56082	0.0973926	-0.153349	0.0855812	0.330558	-1.43111	0.154487	0.47947	0.316979	0.081159		none
YGR045C	-0.242768	-0.22231	-1.42002	0.0641209	-0.0654702		-1.2751		-0.913829		-0.913829			none
YGR049W	-1.2034		-3.82015	0.0852623	-0.233124	-0.0210655	-2.66197	-2.4234	-2.00388	-1.69719	-1.85054	-2.52026		none
YGR050C	-0.333711		-2.12052	-0.0172827	-0.112603	-0.0383424		-2.56944	-1.23787	-1.06358	-1.15073	-2.04445		none
YGR051C	-0.0152709		-0.945263	-0.0905924	0.182575	0.0893438	-1.27964		-1.25697	-0.788118	-1.02254	-1.36562		none
YGR059W	-1.21916		-2.06305	-0.14253	-0.202974	-0.0868138	-2.11052			-1.45866	-1.45866	-1.91765		none
YGR064W	0.178668		-1.48837	0.0516331	-0.143013	0.06267	-1.42274	-0.378533	-1.12794	-0.602802	-0.86537	-1.59508		none
YGR066C	-0.475621		-1.59294	-0.149522	0.0672881	-0.0296945	-1.52222	-0.00931766	-1.29278	-0.678186	-0.985484	-1.30786		none
YGR069W	0.0919671		-1.96962	-0.106593	0.119986	0.147752	-1.49415	-0.246219	-0.520331	-0.719799	-0.620065	-1.0005		none
YGR073C	-0.298028		-1.31996	0.15518	-0.178679	-0.146254	-1.34338	-0.270518	-0.740543	-0.323363	-0.531953	-1.47782		none
YGR075C	-0.235645		-1.30406	0.0126031	-0.167417	0.0429792	-1.33162	-0.530045	-0.795434	-0.473609	-0.634522	-1.26529		none
YGR083C	-0.114392	-0.29243	-1.7384	0.13067	-0.0592131	0.308471		-0.706447	-1.23643	-0.810973	-1.0237	-1.42256		none
YGR085C	-0.347832	-0.17384												none
YGR097W	-0.228892	-0.17122		0.143024	0.00738802	0.180534	-1.10721		-0.939819	-0.192855	-0.566337	-0.766244		none
YGR100W	0.224395			0.312652	-0.0498347	-0.00414199	-1.20705	-0.232428	-0.867416	-0.445491	-0.656454			none
YGR107W			-2.02936	-0.00933601	0.0189652	-0.0580877	-1.88486	-0.893152	-1.14419	-0.610584	-0.877386	-1.7595		none
YGR108W	-1.08128	-1.1689	-4.47185	0.157393	-0.295284	-0.0739401	-2.8728	-2.90319	-1.75975	-1.6371	-1.69843	-3.0517		none
YGR114C	0.157417		-1.81597	-0.0283565	0.221704	-0.100422	-1.1503	-0.875239	-0.796266	-0.437216	-0.616741	-1.5064		none
YGR115C	0.228301		-1.5628	0.0743507	0.12893	-0.145492	-1.1749	-0.600456	-0.534667	-0.308202	-0.421435			none
YGR118W		-0.13128	-3.35662		-0.226816									none
YGR137W	-0.105964	0.36582	-1.48482	0.110581	0.004088	0.152087		-0.0468939	-0.297422	-0.182247	-0.239835	-0.543619		none
YGR139W			-2.28889	0.392765	-0.40515	-0.152209	-0.395408	-0.167221	0.200946	0.42441	0.312678	-0.625629		none
YGR146C	0.155444	-0.51838	-0.740081	0.178089	0.391786	0.147371	-0.016158	0.0903331	-0.526013	0.0214675	-0.252273	0.045239		none
YGR148C		-0.57003												none
YGR152C	-0.407928	-0.048954	-3.66485	-0.0420734	-0.0365189	0.162195	-3.67404	-2.76216	-1.96308	-1.44276	-1.70292	-3.66049		none
YGR160W	-0.524019		-2.62795	-0.187502	-0.1708	-0.0850191	-2.2304	-1.78943	-1.59709	-1.64728	-1.62219	-1.48359		none
YGR163W	-0.0642622		-1.77252	0.147513	0.00955039	0.142325	-1.54721	-0.95798	-1.26913	-0.840634	-1.05488	-2.19917		none
YGR164W	0.22882		-0.404223	0.142805	-0.140339	-0.149493	-1.15226	0.376018	-0.534275		-0.534275	-1.18341		none
YGR176W	-0.964108		-2.77889	-0.209671	-0.108743	-0.0699487	-2.73261	-1.687	-1.74809	-1.56885	-1.65847	-2.0072		none
YGR180C	-1.04587	-0.38005	-3.21693	0.102259	-0.0764303	-0.0401117	-1.81988	-1.97633	-1.08561	-1.09373	-1.08967	-1.56701		none
YGR182C	0.434766	0.20171	-1.22508	0.232801	-0.0881315	0.114355	-1.5456	-0.468675	-0.826135	-0.312013	-0.569074	-1.94626		none
YGR190C	-0.411169		-2.30027	-0.00568922	-0.052769	-0.00461185	-2.40541	-1.55308	-1.20843	-0.540698	-0.874563	-2.19263		none
YGR213C	-0.423766		-1.804	0.0402688	-0.103403		-1.47632	-1.17255		-0.850904	-0.850904	-0.395849		none
YGR214W	-0.835655	-0.17773	-3.11913	0.0203083	-0.0860839	0.130081	-3.02403	-2.1182	-2.21429	-1.95673	-2.08551	-2.55803		none
YGR219W	0.238223		-1.66079	0.026767	-0.00906594	0.0597381	-1.3915	-0.533852	-0.951008	-0.527806	-0.739407	-1.79813		none
YGR224W	-0.756551		-2.95189	-0.03674	0.0468779	-0.0413546	-2.02491	-1.21873		-1.13143	-1.13143	-1.70603		none
YGR225W	-1.50047		-3.51976	-0.0544403	-0.21031	-0.0839423	-1.68838	-1.54215		-1.59696	-1.59696			none
YGR226C	-1.49117			-0.0517607	-0.119898	-0.0709116	-2.3101	-1.93335	-1.82439	-2.24431	-2.03435			none
YGR228W	-0.0163647		-2.91819	-0.0937794	0.019662	-0.219261	-3.28517	-2.04817	-1.99741	-1.48219	-1.7398	-3.01283		none
YGR234W	-1.75638	-2.0982		0.0329758	-0.0159586	0.11369	-3.1915	-1.79088	-2.09265	-1.3305	-1.71157	-2.37485		none
YGR236C	-0.06299		-0.995901	0.0329393	0.262871	0.148178	-1.10317	0.0589479	-0.938138	-0.0301134	-0.484126			none
YGR242W	-0.788222		-3.38096	-0.0198655	0.196263	-0.031196	-2.29363	-1.46934	-1.75866	-0.954911	-1.35679	-2.47248		none
YGR249W	-1.68838		-2.61154	0.136612	-0.176655	-0.312732	-2.5613	-1.98215	-1.75842	-1.69034	-1.72438	-2.38537		none
YGR256W	-0.378294		-2.48961	-0.0401333	-0.243597	-0.204925	0.40261	1.83259	0.716901	0.760217	0.738559	-0.76938		none
YGR259C	-1.6308		-4.27692	-0.047902	0.104596	0.154812	-2.87311	-2.95958	-2.60977	-2.47691	-2.54334	-2.54907		none
YGR260W	-1.63712	-0.77775	-4.08637	-0.0695545	0.0932179	0.0786908	-2.77973	-2.74579	-2.27155	-2.28445	-2.278	-2.47347		none
YGR265W	-0.562636		-2.79831	0.10758	-0.1117	-0.0990361	-1.75252	-1.70615	-1.3828	-1.53553	-1.45916	-1.91503		none
YGR269W	-0.420274		-2.17935	0.0936531	-0.119847	0.0930922	-1.9937	-0.803713	-1.18112		-1.18112			none
YGR270W	-0.123806	-0.19195	-2.30731	0.0122911	0.101168	-0.0727025	-1.42308	-1.04093	-1.02532	-0.643248	-0.834286	-1.76354		none
YGR272C	-0.0260686	-0.63156	-1.12788	1.27026	-0.23786	-0.210884	-0.768987	-0.29664	-0.717393	0.366242	-0.175576	-0.418185		none
YGR273C	0.181393		-3.22834	-1.21636	-0.120674	0.163044	-2.17021	-2.24317	-1.84208	-2.20645	-2.02427			none
YGR287C	-0.327678		-1.82156	0.193318	0.0622256	-0.0768132	-1.35499	-0.815746	-0.926889	-0.904713	-0.915801			none
YGR290W	-0.649019		-2.79914	-0.00238235	0.410427	-0.0743184	-1.83418	-1.09507		-0.908309	-0.908309	-1.94091		none
YGR291C	-0.413485		-1.87829	-0.00759094	0.156301		-1.22809		-0.945161	-0.0810101	-0.513086			none
YGR292W	-0.358198		-1.59134	-0.00502706	0.397261	0.0724115	-1.73777	-1.12564	-1.63779	-1.47968	-1.55874	-1.57226		none
YGR293C	-0.387461			-0.0438257	0.00786228		-1.65082	-0.962341	-1.23704	-1.09903	-1.16804	-1.37326		none
YGR294W	-1.10856	-0.1044	-1.90975	-0.0287253	-0.0969228	0.033059	-1.89246	-1.55504	-1.65561	-1.78888	-1.72224	-1.29677		none
YGR295C	-0.420555	-0.34794	-2.49785	0.0465937	-0.188463	-0.0790452	-1.71014	-1.44956	-1.48492	-1.33301	-1.40897	-1.35293		none
YGR296W		-0.36109	-3.70847		0.207769	0.0265403	-2.73483		-1.84418		-1.84418	-2.88265		none
YHL001W		-0.1859	-2.71496	0.034627	-0.0734196	0.15041	-2.56738	-1.62147	-1.81461	-1.57149	-1.69305	-2.56192		none
YHL005C			-1.97624	0.00777964	0.00323994	0.00983745	-1.91207	-0.815065	-1.31381		-1.31381			none
YHL006C	-0.679401		-3.4506	-0.173733	-0.173335	0.0912716		-1.71893	-1.81043	-1.18924	-1.49984	-2.18043		none
YHL008C	-0.662999	-0.018078	-2.35419	-0.0664609	-0.154885	-0.0654019	-1.34269		-1.0977	-0.605542	-0.851619	-0.998279		none
YHL015W	-0.441082	-0.39547												none
YHL017W	-0.165756	0.57778	-1.6071	0.0519106	-0.0830166	-0.149155	-1.10702	-0.539726	-0.837753	-0.519243	-0.678498	-1.23296		none
YHL022C	-0.631837		-2.43105	-0.0348024	-0.144955	-0.344202	-1.71126	-1.12506	-1.24875	-1.0325	-1.14063	-1.4425		none
YHL033C		-0.29365												none
YHL037C			-0.609482	0.0426235	-0.428842	-0.211238	-1.25821	0.425588	-0.771658		-0.771658	-0.902253		none
YHL041W	-0.193497		0.319777	0.0883091	-0.295135	-0.0845433	-1.13222							none
YHL043W	0.0458293		0.054182	-0.0680486	-0.102077	0.0591287	-1.47015	-0.591285	-0.923528	-0.757246	-0.840387	-0.601511		none
YHL045W	-0.521763			0.0209163	-0.157138	-0.225155	-1.6505		-1.3519	-1.16378	-1.25784			none
YHL046C	-1.00656	0.16823	-1.94208	-0.00306439	-0.0877341	0.103068	-2.19731	-1.54966	-1.5432		-1.5432	-1.27818		none
YHL047C	-0.533019	0.47964	-1.46105	-0.239747	-0.109443	-0.0847175	-2.02718	-1.19716	-1.74632	-1.40911	-1.57771	-1.58305		none
YHL048W	-0.475949		-2.4327	-0.190049	0.208775	0.0408849	-1.70152	-1.44885	-1.42008	-1.16324	-1.29166	-1.32118		none
YHL049C	-0.74417		-3.13013	-0.126731	0.0418085	-0.102435	-2.41939	-2.28832	-1.74456		-1.74456	-2.35406		none
YHL050C		-0.41888	-3.41543	-0.198202	0.115802	0.125517	-2.95629	-2.51385	-2.085	-1.70566	-1.89533	-2.70431		none
YHR008C	0.716722	0.10188	-1.00316	0.12511	-0.0355868	0.261114	-0.654478	1.38237	0.219264	0.510987	0.365125	-0.833382		none
YHR010W	-0.862081	-0.19975	-3.07918	0.0996101	-0.352142	-0.0616184	-3.07576	-2.07092	-2.20769	-1.96338	-2.08553	-2.92971		none
YHR014W	-1.09269		-3.07297	0.0389982	-0.0375079	-0.172685	-2.14542	-1.70353	-1.70459		-1.70459	-2.14061		none
YHR021C	-0.661803	-0.21209	-2.78133	0.123007	-0.216857	0.088206	-2.76476	-1.65987	-1.92292	-1.70442	-1.81367	-2.40817		none
YHR032W	-0.953414	-0.67944	-3.32371	-0.236976	-0.0193111	0.0745059	-2.45073	-2.0056	-1.94157	-1.8617	-1.90164	-2.30457		none
YHR039C-B	-0.625459		-2.44097	-0.0611921	-0.118199	-0.0364795	-1.93033	-1.25446	-1.20997	-1.12133	-1.16565	-1.51955		none
YHR049C-A	0.200465		-1.78586	0.0639723	-0.141341	-0.0732929		-1.34696	-1.6757	-1.48062	-1.57816	-1.71802		none
YHR051W	-0.0627796	-0.29359	-1.90969	0.126685	-0.323489	-0.0496532	-1.94492	-0.930903	-1.09201	-0.75639	-0.924198	-2.70927		none
YHR053C		-0.04532												none
YHR054C	-0.92414	-0.12467	-1.89428	0.0415846	-0.108233	-0.0679393	-1.66995	-2.42461	-1.78473	-2.00912	-1.89693	-1.54414		none
YHR055C		-0.15493												none
YHR073W	-0.432654	-0.45538	-1.8541	0.0344062	0.104144	-0.00951715	-1.93067	-1.06857	-1.44557	-0.892673	-1.16912	-1.95098		none
YHR079C	-0.439843		-1.22759	-0.0654514	-0.0953621	0.0678532	-1.6822	-0.678689	-1.12765	-0.4512	-0.789427	-1.35657		none
YHR079C-B	-0.365999		-2.55989	-0.0450042	0.152708	0.0095106	-1.80126	-1.22738	-1.53632	-0.916975	-1.22665	-1.92959		none
YHR093W			-3.28394	-0.0819764	-0.140075	0.00383054	-1.82972	-1.49361	-1.55784	-1.52386	-1.54085	-2.03702		none
YHR095W	0.0551085		-1.65852	-0.0486851	0.160213	0.0846466	-1.33834	-0.237847	-0.679068	-0.458268	-0.568668	-0.807065		none
YHR106W	0.0099586	-0.20481	-1.98274	-0.102784	0.041811	0.167195	-1.41272	-0.493005	-0.578452	-0.418396	-0.498424	-2.00754		none
YHR117W	-0.344996		-2.58549	-0.0679381	-0.0130982	0.109117	-1.53837	-1.26443	-1.45935	-1.20658	-1.33296	-1.47068		none
YHR125W	-1.1668		-2.94195	-0.0528879	-0.199147		-1.76581	-1.5759		-1.09022	-1.09022	-1.62496		none
YHR126C	-0.541586		-1.63805	-0.0168327	0.345779	0.256192	-0.890413	0.439735	-0.49486	-0.00676725	-0.250814	-0.471171		none
YHR130C	-0.11732		-1.45779	0.122066	-0.0238241	0.0226956	-1.49728	-0.940004	-1.18681	-0.600172	-0.893489	-1.64312		none
YHR139C-A	-1.13054		-2.84558	-0.0594784	-0.0661764	-0.023484	-1.64788		-0.985369	-0.984516	-0.984943	-1.48507		none
YHR141C	-0.635273	-0.28051	-2.74385	0.0674079	-0.110838	0.015284	-2.86072	-1.66963	-2.01071	-1.45964	-1.73518	-2.92181		none
YHR145C	-0.588305		-2.05567	0.27318	-0.0063425	-0.120619	-1.64692	-1.16758	-0.427438	0.0842778	-0.17158	-1.39329		none
YHR153C	-1.04011		-4.64284	-0.0508586	-0.176405	0.011456	-3.28868	-3.59686	-2.09452	-1.78105	-1.93779	-3.81488		none
YHR173C	-0.49729		-2.15773	0.122086	-0.149765	-0.0343554	-2.31225	-1.21357	-1.60603	-1.18504	-1.39553			none
YHR175W	-0.0244185	-0.43091	-1.18611	-0.0849999	0.109947	0.0970763	-1.71204	-0.579452	-1.36752	-0.732308	-1.04991	-1.36358		none
YHR180W	-0.196556		-2.08858	-0.0442523	-0.0289431	0.0875688	-1.6934	-0.375511	-1.30863	-0.880427	-1.09453	-1.46491		none
YHR185C	-0.143051			0.142155	0.0422011	0.0222484	-1.39396	-0.661082	-0.918771	-0.461283	-0.690027	-1.319		none
YHR199C	0.632856	0.053282	-0.580264	-0.0608619	0.251141	0.169504	-1.03284	0.070263	-0.513115	-0.0388519	-0.275984	-1.00251		none
YHR203C		-0.32203			-0.0125711									none
YHR212C	-0.320373		-2.42072	-0.0548736	-0.127788	-0.0971249	-1.75357	-1.2624	-1.51864	-1.36067	-1.43966	-1.50206		none
YHR213W	-0.625028	-2.0922	-2.52484	0.0286696	-0.204896	-0.180671	-1.88636	-1.5115		-1.52157	-1.52157	-1.57524		none
YHR214C-B	-0.818599		-2.13653	-0.114738	-0.110705	-0.188167	-1.66839	-0.642407	-0.302198	0.559968	0.128885	-1.65289		none
YHR214W	-1.09574		-3.50655	-0.0291452	-0.181383	-0.107054	-0.85339	-1.26919	-0.833146	-1.14863	-0.990887	-0.740517		none
YHR214W-A	-1.05178		-2.99243	0.15259	-0.147229	-0.143443	-0.9587	-0.092275	-0.711388	-1.42083	-1.06611	-0.640191		none
YHR215W	-1.03895		-2.96519	0.0936324	-0.158763	0.0416062	-2.33458	-1.99067	-2.19054	-2.06237	-2.12646	-2.19562		none
YHR216W	-0.274305		-2.44658	-0.123619	0.0726227	0.148453	-2.21882	-1.58473	-1.8658	-1.65957	-1.76269	-0.679422		none
YHR217C	0.316258	0.17392	-0.267002	-0.0147039	0.133764	0.341117	-1.12816	-0.430347	-0.717252	-0.734859	-0.726055	-1.3439		none
YHR218W	-0.85928	-0.2248	-3.5746	-0.125437	0.0236876	-0.0782889	-2.74461	-2.82873	-2.02643	-1.91408	-1.97026	-2.77166		none
YHR219W	-0.600427	-0.46072	-3.31959	-0.114911	0.125568	0.0684358	-2.82161	-2.53316	-2.09026		-2.09026	-2.74618		none
YHROO5C-A	-0.111314		-2.45917	-0.0464682	0.00231961	0.152639	-2.14589	-1.43613	-1.92297	-1.52185	-1.72241	-2.38753		none
YIL011W	-1.22441	-0.11397	-3.85538	0.0447863	0.0143679	0.119187	-1.26907	-1.63656	-1.67812	-2.0083	-1.84321	-0.403463		none
YIL012W	-0.80442			0.0149963	-0.0696117	0.0730504	-1.58818		-1.27676	-0.732693	-1.00473	-1.4298		none
YIL015C-A	-0.93445		-4.18767	0.0318255	-0.133389	-0.0207884	-2.51578	-2.77223	-2.19447	-1.88611	-2.04029	-2.3917		none
YIL017W	-0.159512		-1.14779	0.0981878	0.174873	-0.110473	-0.799774	-0.13064	-0.57701	0.0333438	-0.271833	-0.394719		none
YIL018W	-0.780689	-0.31847	-3.34499	-0.00114652	-0.171301	0.0810563		-2.33577	-2.43043	-1.95111	-2.19077	-2.85042		none
YIL020C	0.220994	-0.38005	-1.79019	-0.231268	-0.0308303	0.0525756	-1.89966	-1.10582	-1.51698	-0.850601	-1.18379	-1.95395		none
YIL024C	-0.37801		-1.74355	-0.0433795	-0.168303	-0.0155098	-2.37049	-1.40105	-1.68226	-0.997123	-1.33969	-2.0319		none
YIL025C	-0.931505		-3.40482	0.12986	-0.28152		-3.20359	-1.6388	-1.87195	-1.57301	-1.72248	-2.06252		none
YIL028W	-0.880781		-2.40179		0.0560868	0.0465069	-1.68696	-1.1516	-1.3269	-0.937398	-1.13215	-1.29463		none
YIL029C	-0.633547		-2.34412	-0.0240225	0.104127	0.051264	-1.58967	-1.1916	-1.34716	-0.654344	-1.00075	-1.4741		none
YIL031W	0.0785612	-0.39396	-1.1155	-0.023022	-0.0533528	-0.0256982	-1.30804	-0.154391	-0.836577	-0.234192	-0.535385	-0.547873		none
YIL032C	-0.0292696		-0.722644	0.0866764	-0.066095	0.0295628	-1.25892	-0.280446		0.0659356	0.0659356	-0.533076		none
YIL046W	0.0145601	0.29055	-0.724072	0.0220895	0.0944102	0.0647917	-0.53079	-0.432916	-0.253005	0.00267892	-0.125163	-0.841728		none
YIL047C	-0.299152	-0.19572	-1.50168	-0.0713377	-0.28235	0.0426289	-2.36298	-1.2087	-1.63837	-1.30155	-1.46996	-2.21658		none
YIL052C	-0.528744	-0.29656	-2.74572	0.131744	-0.074717	0.11573	-2.59187	-1.79546	-2.02654	-1.69327	-1.85991	-2.4625		none
YIL054W	-0.0930371		-1.5114	-0.0209604	-0.141385	0.0443781	-1.31067	-0.643412	-0.769849	-0.321053	-0.545451	-1.11803		none
YIL055C														none
YIL057C	-0.395789		-1.70898	0.553742	0.911984	-0.110581	-1.6289		-1.39112	-0.286202	-0.838662			none
YIL058W	-0.628663		-2.74366	0.095001	-0.0986947	0.118482	-2.60845	-1.43702	-1.9266	-1.47322	-1.69991	-2.56353		none
YIL059C	-0.479362		-2.46837	-0.052422	-0.124764		-2.24106	-1.01556	-1.62168	-1.16871	-1.3952	-2.29981		none
YIL060W	-0.547467		-2.16975	0.142882	-0.0234878	0.0568775	-1.79416	-0.908292	-0.611517	-0.125825	-0.368671	-1.49418		none
YIL066C				-0.0206992	-0.379063	-0.0151736	-2.54199	-1.67879	-0.729101	-0.888499	-0.8088	-2.50684		none
YIL069C	-0.747134	-0.21454	-3.00004	0.0980293	-0.0126139	0.123463	-2.67639	-2.00898	-2.12847	-1.80231	-1.96539	-2.51772		none
YIL071W	-0.0793142		-1.88113	0.102041	-0.0484389	-0.161556	-1.14038	-0.461449	-0.587434	0.0387323	-0.274351	-1.3861		none
YIL072W	-0.762118		-1.9658	0.03619	-0.0226084	-0.11446	-1.51681	-0.673775		-0.83277	-0.83277	-1.69834		none
YIL073C	-0.438969		-2.04344	0.0297349	-0.16381		-1.60769	-0.196864		-0.439836	-0.439836	-1.50501		none
YIL080W	-0.69882		-1.91516	0.0202008	0.147967	0.118154	-0.965782	-0.1823	-0.178484	0.582987	0.202252	-1.17148		none
YIL082W	-0.638074	-0.24751	-2.19117	0.0127306	0.00602126	-0.137064	-1.21406	-0.631691	-0.026529	-0.00240463	-0.0144668			none
YIL082W-A	-0.832035		-2.13473	0.144011	0.22666	0.164759	-0.934912	-0.120845	0.005007	0.450944	0.227975	-1.09094		none
YIL085C	-0.349337	-0.46806	-1.60343	-0.0299928	-0.0755052	0.0105695	-1.59364	-0.901243	-1.15581	-0.745521	-0.950664	-1.73339		none
YIL086C	0.0381666		-1.43962	0.0187987	0.0369209	0.0217075	-1.18158	0.00941127	-0.944411	-0.248802	-0.596607	-1.26241		none
YIL087C	-0.0689538		-1.15592	-0.0184262	-0.00744738	0.21235	-0.689264	-0.00495171	-0.516313		-0.516313	-0.975069		none
YIL099W	-0.567524		-1.21948	-0.0488814	0.0499971	0.140387		-0.361391	-0.968	0.0800653	-0.443968	-1.10187		none
YIL100W	-0.486403		-1.89146	-0.178266	0.0732153	0.0122686	-1.10815	-0.311314	-0.901465	-0.216362	-0.558914	-1.11268		none
YIL101C	-1.20785		-3.13654	0.196711	0.433569	0.314267	-0.245593	-1.2761	-0.211509	0.0097534	-0.100878	-1.33055		none
YIL102C	-0.242464		-1.55911	-0.0382891	-0.00321024	-0.00736728	-1.27457		-0.992481	-0.193326	-0.592903	-1.13945		none
YIL119C	-1.30454			0.17809	-0.320067	-0.116433	-1.19754		-1.31894		-1.31894	-0.789308		none
YIL123W		0.036873	-4.52625	0.0624866	0.101261	0.0596327	-3.70802	-2.51012	-1.20066	-1.08436	-1.14251	-3.27643		none
YIL132C	-1.02549		-3.0817	-0.0718169	-0.0747192	0.00936842	-2.59982	-1.86848	-1.59127	-1.05645	-1.32386			none
YIL133C	-0.852287	-0.41273	-3.18345	-0.0599256	-0.0225367		-2.55067	-2.04596	-1.91845	-1.78008	-1.84927	-2.51914		none
YIL140W	-0.504453		-3.39114	-0.090457	0.0351566	0.125391		-2.29038	-1.63161	-1.34491	-1.48826	-2.92565		none
YIL148W	-0.577006	-0.43311	-2.71524	0.0298762	0.0475991	0.0795554	-2.65056	-1.89605	-1.96794	-1.56236	-1.76515	-2.53708		none
YIL150C	-0.21517		-1.82917	-0.0954855	-0.0393281	0.0495485	-1.65134	-0.585466	-1.23799	-0.500417	-0.869204	-1.56668		none
YIL151C	-0.291454		-1.81713	-0.00383225	-0.148683	-0.116471	-1.89061	-0.478788	-1.45761	-0.871142	-1.16438	-2.0074		none
YIL163C			-2.78216	0.00397736	0.0406843	0.0761002	-1.99848	-1.34661	-1.69502		-1.69502	-1.5496		none
YIL164C	-1.1642		-3.09091	-0.35743	-0.0209587	0.042595	-1.89747	-1.08095	-1.25492		-1.25492	-1.83387		none
YIL165C	-0.918511		-2.85577	-0.0296577	0.0350222	0.0453551	-1.87305	-0.970068	-1.3004	-0.602706	-0.951554	-1.87473		none
YIL167W	-0.108854			-0.0827837	-0.214685	-0.0597301	-1.91911	-0.779737	-1.85298	-1.3263	-1.58964	-1.70981		none
YIL168W	-0.0420012		-1.83489	0.0260865	-0.206597	-0.00272146	-1.71348	-0.475759	-1.50362	-1.02111	-1.26236	-1.75082		none
YIL169C	-1.21316		-3.25562		-0.186469	-0.351871		-0.285985		0.173663	0.173663	0.184388		none
YIL170W	-0.5304		-3.02035	-0.25694	-0.199225	0.107881	-2.4427	-1.17287	-2.01822	-1.52427	-1.77124			none
YIL171W	-0.358279		-3.18412	-0.00237723	-0.056082	-0.0377945	-2.14481	-1.35595	-1.64196	-1.37309	-1.50752	-1.71415		none
YIL172C	-0.641835		-2.5056	-0.201068	0.0668839	0.0103724	-1.82619	-1.22519	-1.61991	-1.51413	-1.56702	-1.78554		none
YIL173W	-0.719152		-2.42987	-0.0446381	0.324764	0.0481451	-1.08815	-1.27907	-1.31018	-1.22835	-1.26927	-0.516586		none
YIL174W	-0.95354		-2.99681	-0.0892547	-0.0783361	-0.117852	-2.06149	-0.930933	-1.56454	-1.37156	-1.46805	-1.68019		none
YIL175W	-1.23861		-3.01601	-0.0082342	-0.0603618	-0.170886	-2.11856	-1.31736	-1.78838	-1.17509	-1.48173			none
YIL176C	-0.971343	-0.77378	-1.82226	-0.0572556	-0.121844	0.0119436	-1.78286	-1.61052	-1.57619	-1.54221	-1.5592	-1.10394		none
YIL177C	-0.702673	-0.36202	-3.39167	0.072016	0.00131246	-0.0302984	-2.62496	-2.58813	-1.99953	-1.66688	-1.83321	-2.77995		none
YIR013C	-0.489527		-1.86739	-0.142684	-0.153857	0.201274	-1.72324	-0.666149	-1.19545	-0.478812	-0.837132	-1.09091		none
YIR015W	-0.234714		-2.0632	-0.215265	-0.0903316	0.000733912	-2.07705	-0.568839	-1.45585	-0.691935	-1.07389	-1.82089		none
YIR016W	-0.344558	-0.029561	-1.94692	-0.269698	0.218929	0.0920728	-1.70396	-1.04502	-1.23291	-0.513159	-0.873036	-1.58409		none
YIR019C														none
YIR020C	-0.575557		-2.41642	-0.0681249	0.0455442	-0.0339435	-1.88852	-1.23493	-1.35688	-1.06898	-1.21293	-2.09133		none
YIR022W	-0.0799974	-0.27004	-2.36001	0.0152241	0.0609088	0.272372	-2.03596	-1.09092	-1.19472	-0.830152	-1.01244			none
YIR024C	0.172352		-1.69678	-0.0438723	0.0662038	0.0284329	-1.33778	-0.247429	-0.684662	-0.0903496	-0.387506	-1.31702		none
YIR027C	-1.36622		-3.70538	0.0556489	-0.140666	0.0945359	-1.44612	-1.78306	-1.2226	-1.35704	-1.28982	-1.43259		none
YIR028W	-1.06968			-0.0785436	-0.104759	-0.0516413	-1.91828	-0.770565	-1.18935	-0.937438	-1.0634	-1.90462		none
YIR030C	-1.50408		-3.84468	-0.186052	-0.0959304	0.0408078	-2.52539	-1.23026	-1.77579	-2.09044	-1.93312	-1.56912		none
YIR035C	-1.35724	-0.52243	-3.70891	-0.121145	-0.305644	-0.2181	-2.4362	-0.71262	-0.789291	-0.799525	-0.794408	-2.45706		none
YIR037W	-0.0970123	-0.058476	-2.72645	0.0144799	-0.0273163	0.215739	-1.86306	-0.877422	-1.12467	-1.22077	-1.17272	-2.31168		none
YIR040C	-1.06829		-2.66572	0.0867223	0.0444185	-0.217468	-1.9858		-1.72738		-1.72738	-1.69909		none
YIR041W	-0.771501	-0.18799	-1.3868	0.149807	-0.0698948	0.0498412	-1.2953	-0.716672	-1.03339	-1.01649	-1.02494	-0.605508		none
YIR042C	-1.24109		-3.72981	-0.0979008	0.0186599	0.0655416	-1.156	-1.4463	-1.59703	-1.15352	-1.37527	-1.12097		none
YIR043C	-0.358705		-2.37622	0.0781342	-0.0603728	0.0558589	-1.80438	-1.6228	-1.36149	-1.23939	-1.30044	-1.40131		none
YIR044C	-0.342167		-2.48604	0.0395121	-0.142538	0.0893601	-1.73711	-1.51909	-1.37238	-1.25626	-1.31432	-1.15394		none
YJL007C	0.100364		-0.729364	-0.104094	-0.0932918	-0.26606		0.156119	-0.757676	-0.151278	-0.454477	-1.22968		none
YJL009W	-0.0103562		-1.25097	-0.00329291	0.00226664	-0.0162002	-1.58714	-0.898606	-1.113	-0.797595	-0.955296			none
YJL015C	-1.14345		-2.46365	0.0932496	-0.163415	-0.00973102	-1.07367	-1.26089	-0.501045	-0.545717	-0.523381	-1.10283		none
YJL016W	-1.23825	-0.064141	-2.49577	-0.00931169	-0.198484	-0.170754	-1.04157	-1.21885	-0.362921	-0.480323	-0.421622	-1.11226		none
YJL017W	-1.39013		-2.73801	0.120296	-0.340732	-0.115507	-1.21679	-1.19926	-0.40345	-0.484278	-0.443864	-1.18233		none
YJL018W	-0.551017		-3.432	0.144656	-0.0925415		-2.75865	-2.04643	-1.90351		-1.90351			none
YJL019W	-0.711665		-3.57551	-0.00466864	-0.0108281	-0.105327	-2.94831	-1.96912	-1.76348	-1.22521	-1.49435	-2.94847		none
YJL021C	0.558005		-1.28249	0.0224819	0.032866	0.159188	-1.17571	-0.251814	-0.745584	-0.304171	-0.524877	-1.67009		none
YJL022W	-0.395827		-2.04643	0.141337	-0.0922032	0.0715865	-1.29103	-1.16136	-1.23858	-0.798624	-1.0186	-1.42099		none
YJL026W	-1.04192	-0.027615	-4.10801	0.0658276	-0.0794219	-0.05481	-2.48118	-2.26217	-1.38955	-1.39265	-1.3911	-2.44808		none
YJL027C	-0.268887			0.0439477	-0.0182834	-0.15937		-0.349454	-1.05538		-1.05538	-1.0201		none
YJL028W	-0.471909		-1.87395	-0.0843133	0.0503969	-0.29948	-1.57678		-0.917616	-0.586028	-0.751822	-1.32329		none
YJL032W	0.214609		-1.49563	-0.148228	-0.120571	-0.0586901	-1.50839	-0.552193	-1.10185	-0.600307	-0.851076	-1.37637		none
YJL038C	-1.37003		-3.5289	0.0721585	-0.136123	0.0166617	-1.63476	-1.61632	-1.57723	-2.08893	-1.83308			none
YJL064W	-0.178696		-1.77608	-0.0114728	0.0731877	0.351801	-1.64132	-0.661559	-1.01427	-0.594969	-0.804619	-1.48413		none
YJL067W	0.548206		-1.08125	-0.017631	-0.028114	0.0950002	-0.97348	-0.12711	-0.406045	0.0861327	-0.159956	-0.251297		none
YJL075C	-0.123579		-2.2812	0.0493512	-0.00871658	-0.0606566	-2.01049	-1.52209	-1.63349	-1.30877	-1.47113	-2.14916		none
YJL076W	-0.402378		-2.08068	-0.0242006	-0.144538	0.00156521	-1.55127	-0.111422	-1.11228	-0.407018	-0.759648	-1.65981		none
YJL077C	0.348901		-1.38682	-0.0207446	0.21091	-0.0498735	-1.53017	-1.5212	-2.19913	-1.72377	-1.96145	-1.48264		none
YJL086C	-0.220547			-0.0832399	-0.189521	0.0869358	-1.68313	-0.47936	-1.19903	-0.156791	-0.67791	-1.35101		none
YJL107C	-1.27479		-4.12627	-0.137893	0.503977	0.195635	-1.58711	-1.87902	-0.418313	0.32683	-0.0457416	-1.95227		none
YJL113W	0.466754		-0.899609	-0.0561166	0.123008	-0.174121	-2.13998	-0.885904	-1.18181	-0.887628	-1.03472	-2.08626		none
YJL114W	-0.323868		-2.19817	-0.110347	-0.199261	-0.187996	-1.83537	-0.93146	-1.23663	-0.323266	-0.779948	-2.09284		none
YJL119C	-0.481969		-2.11353	0.0790648	-0.183126	0.077515	-1.9299	-1.55372	-1.33473	-1.22319	-1.27896	-1.01848		none
YJL120W	-0.303446		-2.51745	-0.00538393	0.033334	0.117421	-2.50441		-1.75841	-1.62228	-1.69035			none
YJL127C														none
YJL134W	-0.376334	-0.0852	-2.71537	-0.0744726	-0.371076	-0.0336179		-1.24064	-1.74757		-1.74757	-2.63073		none
YJL135W	0.0547136		-1.9045		-0.208075		-1.70416	-0.589784		-0.617984	-0.617984			none
YJL136C	-0.491106	-0.56056	-2.43949	-0.0284279	0.0235165	0.286224	-2.65991	-1.81665	-1.89779	-1.56735	-1.73257	-2.39055		none
YJL141C	0.0547161		-1.39515	-0.0605898	0.509108	0.0956111	-0.933616	-0.0674469	-0.760925	0.235764	-0.26258	-1.43823		none
YJL149W	0.235399		-0.949951	0.11509	-0.0809676	-0.0050917	-1.12293	-0.253273		-0.238931	-0.238931	-1.17426		none
YJL150W	1.05642		0.409095	0.0828259	0.101796	0.657096	-0.971		-0.639746		-0.639746	-0.679218		none
YJL152W			-1.77744	0.0512699	-0.0615293	0.209948	-0.810343	0.802451	-0.13048	0.220808	0.0451642	-0.372078		none
YJL157C	-0.688963	-0.34369	-2.59777	0.0786539	-0.0355732	-0.0673342	-1.09605	-0.42276	-0.64735	-0.354873	-0.501111			none
YJL158C	-1.15797	-0.3481	-3.74415	0.27485	0.0438041	0.231241	-2.64298	-1.08839	-0.829852	-0.610201	-0.720027	-2.24147		none
YJL160C	0.0296733		-2.20443	-0.119302	0.0739354	0.198618	-1.58022	0.247184	-0.46344	0.343562	-0.0599392	-1.65142		none
YJL169W	-0.260377		-1.50926	-0.0362317	-0.136558	-0.0751975	-1.46345	-0.760932	-1.18512	-0.715425	-0.950274	-1.1644		none
YJL170C			-1.62847	0.0476118	-0.0482896	0.10259	-1.4455	-0.124313	-1.11832	-0.751213	-0.934768	-1.56783		none
YJL175W	-0.570575		-2.12299	-0.0597392	0.00376729	-0.217825	-1.76464	-0.674198	-1.15863	-0.751347	-0.954991	-2.0206		none
YJL177W	-0.756556	-0.29797	-2.86834	-0.00495189	0.00108342	0.119906	-2.90282	-1.99253	-2.12331	-1.85543	-1.98937	-2.71844		none
YJL182C				0.89847	-0.035898	0.104256	-1.2052	-0.0919309	-0.904711		-0.904711	-1.11344		none
YJL186W	-1.06805	-0.59196	-3.52621	-0.196629	-0.0735939	-0.0428914	-2.64876		-1.69018	-1.27977	-1.48498	-2.49601		none
YJL188C	0.243526		-1.86146	-0.123191	0.0986505	0.0278229	-2.98801	-1.61635	-2.22084	-1.22282	-1.72183	-2.42827		none
YJL189W		-0.23015	-1.72429	-0.057167	0.0234051	-0.0264474	-2.57643		-1.91344	-0.964175	-1.43881	-2.24458		none
YJL190C		-0.45163												none
YJL195C			-1.1648	0.0331893	-0.386789	0.0488955	-1.63937	-0.466908	-0.732303		-0.732303	-1.58142		none
YJL199C	0.207389		-2.46884	-0.00921204	0.0327189	0.038619	-1.47107	-0.57028	-1.32356		-1.32356	-1.83193		none
YJL202C	0.314224			0.0462023	0.192045	0.220623	-1.30579		-0.733016		-0.733016	-1.32373		none
YJL205C-A	0.0105867		-1.98216	-0.0652028	-0.144365	0.156544	-1.81409	-1.01777	-0.782771	-1.01255	-0.897658	-2.40136		none
YJL211C	-0.516262		-2.65193	0.00505951	0.230368	-0.00903344	-1.77982	-1.68237	-1.45479	-1.01253	-1.23366	-1.78406		none
YJL215C	-0.666781		-2.35259	-0.00540901	-0.0826097	-0.0373528	-1.80806		-1.4604	-1.13515	-1.29778	-1.44929		none
YJL216C	-0.420909			-0.0368991	-0.0228297	0.0334368	-1.44319	-0.947511	-1.25626	-0.563716	-0.909988	-1.93241		none
YJL219W	-0.5124		-3.07118	0.0860142	-0.310814	0.130335	-2.2786		-2.11292	-1.48317	-1.79805	-1.73189		none
YJL220W	-0.536409		-1.79642	-0.0377242	0.123072	-0.0590464	-1.87516	-1.01901	-1.36914	-0.945538	-1.15734	-1.21696		none
YJL221C	-0.952362		-3.05741	0.0967638	0.104095	0.0122292	-1.81786	-1.07952		-1.76616	-1.76616			none
YJL222W	-0.78165		-2.31005	-0.0548237	0.0347132	-0.176655	-1.31642	-0.592608	-1.54244		-1.54244	-0.866706		none
YJL223C	-1.14411	-0.83855	-2.17178	-0.0256906	0.0781095		-1.94638	-1.52891	-1.67481	-1.96567	-1.82024	-1.38795		none
YJL225C	-0.697518	-0.35972	-3.35608	0.0235404	-0.00504767	0.0945519	-2.54952		-2.08072	-1.80655	-1.94364	-2.77896		none
YJR004C	-1.41842	-0.83125	-2.15913	0.233473	0.275168	0.177031	-2.78267		-1.89328	-1.72525	-1.80927	-3.22019		none
YJR018W	0.0008144		-2.09332	0.0921505	-0.0598594	0.0177521	-1.81932	-0.875273	-1.39412	-0.911948	-1.15303	-1.88936		none
YJR020W	-0.240395		-2.22753	-0.0308583	-0.0965455	0.0374972	-2.10416	-0.721755	-1.05394	-0.601847	-0.827894	-1.95789		none
YJR021C	-0.556905		-1.82517	-0.0338034	-0.0513107	0.150629	-1.65705	-0.449528	-0.932847	-0.110102	-0.521475	-1.63376		none
YJR023C	-0.0936875		-2.10468	-0.173143	-0.114524	0.104187	-1.63548	-0.844507	-1.10581	-0.411244	-0.758527	-1.69486		none
YJR025C	-1.35004	0.643	-3.94221	-0.0905692	-0.0321337	0.0265066	-3.40525	-2.8832	-2.72205	-2.53351	-2.62778	-3.82363		none
YJR026W	-0.915319	-2.5312	-2.29937	0.0316422	-0.0422006	-0.149254		-0.291683		0.258129	0.258129			none
YJR027W		-0.77822												none
YJR028W	-0.993706	-1.9557	-2.48061	0.14137	-0.0136307	-0.0985123	-1.22573	-0.283841		0.39406	0.39406			none
YJR029W		-0.89479												none
YJR037W	-1.34374		-2.47248	-0.149494	0.29557	-0.156437	-1.21354		-1.15267	0.0582142	-0.547228	-1.47955		none
YJR038C	-0.0218304		-1.51916	-0.00864724	0.197768	-0.16046	-1.1075	-0.173056	-1.01787	0.209433	-0.404218	-0.633414		none
YJR042W		-0.37613		0.104351	-0.135003	0.117625			-0.650227	-0.267289	-0.458758			none
YJR071W	-0.413952		-2.54492	-0.13926	0.081622	0.0551483	-2.14485	-1.87056	-1.95158	-1.3819	-1.66674	-1.50943		none
YJR078W														none
YJR079W	0.04537		-1.71458	0.0401992	0.0550315	0.166724	-1.72982	-0.537156	-1.08015	-0.539173	-0.809663	-2.03677		none
YJR086W	0.406525	-0.2051	-0.710319	-0.0365668	0.0993012	0.0433857	-1.14135	-0.281778	-0.992961	0.0777673	-0.457597	-1.35487		none
YJR087W	0.009447		-2.15306	-0.0441741	0.0586336	0.10133	-1.74183	-0.820238	-1.18763	-0.58726	-0.887444	-1.93859		none
YJR094W-A	-0.557097		-2.99367	0.0752012	-0.248221	-0.112773	-2.79408	-2.04424	-2.21807	-1.94287	-2.08047	-2.74341		none
YJR095W	-1.38064		-3.15809	-0.239579	0.367156	0.17677	-2.31732		-1.72879	-1.38364	-1.55622	-1.99926		none
YJR106W	-0.468944		-2.35789	0.0814884	0.0184445	-0.0662098	-1.73541	-0.649828	-1.15119	-0.58827	-0.869728	-1.75972		none
YJR107W	-0.174469		-1.73474	0.0737412	-0.142022	0.0426972	-1.84013	-0.944329	-1.36676	-1.06148	-1.21412	-1.76345		none
YJR108W	-0.40033		-1.40181	0.121416	-0.00337324	-0.194615	-1.6406	-0.925659	-1.49034	-0.791002	-1.14067	-1.73658		none
YJR114W	0.209136		-1.40676	-0.0628984	-0.163016	0.187345	-1.6155	-0.790916	-1.19165	-0.532328	-0.86199	-1.09957		none
YJR116W	-0.68647	-0.43503	-3.33586	-0.0482539	0.0501199	0.18065	-3.0909	-2.22746	-2.45776		-2.45776	-2.04511		none
YJR121W	0.0219658	-0.071054	-1.9447	0.156651	-0.0837464	-0.0601842	-1.52295	-0.337265	-0.370796	-0.525106	-0.447951	-2.21302		none
YJR123W		-0.30795				0.191373								none
YJR127C	-1.21229		-3.37697	-0.0571636	0.20443	0.172509	-1.19793	-2.03834	-0.962834	-1.24893	-1.10588	-1.90095		none
YJR128W	-0.429539		-2.00456	-0.097026	0.0309847	0.0440602	-1.60313	-0.799397	-1.05633	-0.803482	-0.929907			none
YJR129C	-1.04398		-3.37158	-0.0955915	-0.103543	0.162265	-3.28543	-2.19694	-2.55329	-1.78334	-2.16832	-3.16991		none
YJR143C	-1.01665	-0.33644	-3.88118	0.0399889	-0.050624	0.157798	-3.39495	-2.7175	-2.16592	-2.02884	-2.09738	-3.44136		none
YJR145C	-0.605609	-0.39789	-3.05736		-0.0749416	0.0736865		-2.06895		-1.69072	-1.69072			none
YJR147W	-0.621714		-2.44744	-0.114244	-0.0530917	-0.0336551	-1.6141	-1.33527	-0.874059	-0.648069	-0.761064	-1.35045		none
YJR149W	-1.28174	-0.68935	-2.18626	0.0384057	-0.20352		-1.77389	-1.18986	-1.28195	-0.886075	-1.08401	-1.5512		none
YJR150C	-1.21602		-2.55256	-0.219741	-0.256242	0.134801	-1.43685	-1.50941	-1.27238	-1.77711	-1.52474	-0.197341		none
YJR153W	-1.07755		-3.18363	-0.056126	-0.00303432	0.0614163	-2.41344	-0.783576	-1.41671	-1.01658	-1.21664	-2.22861		none
YJR154W	-1.43798		-3.85652	-0.0398855	0.38729	0.100773	-2.06159	-1.14506	-0.822707	0.123695	-0.349506	-1.66957		none
YJR155W	-1.13595		-2.99294	-0.0774435	0.388034	0.195057	-1.8821	-0.89766	-0.847874	0.0244782	-0.411698	-1.64194		none
YJR156C	-0.898345		-2.57051	-0.225731	-0.0721685	0.0698078	-1.93677	-1.76455	-1.99786	-2.01963	-2.00874			none
YJR157W	-0.48644			0.000674107	-0.00750864	0.0713899	-1.59419	-0.631741	-1.28817	-0.857189	-1.07268	-1.62148		none
YJR158W	-1.83347		-4.6449	-0.137552	0.117332	-0.0478846	-1.87178	-2.17209	-1.91327	-1.46966	-1.69147	-1.91946		none
YJR159W	-1.09875		-3.26536	-0.166767	-0.0336949	0.210754	-2.18641	-1.6395	-1.85868	-2.08261	-1.97064	-1.98102		none
YJR160C	-0.877903		-2.08582	-0.0524637	0.185235	0.0984149	-1.95501	-2.23041	-2.02932	-2.09384	-2.06158	-1.68658		none
YJR161C	-0.387277	-0.6023	-2.42504	0.130839	-0.172475	-0.0191422	-1.85142	-1.58795	-1.43663	-1.28843	-1.36253	-1.3265		none
YJR162C	0.0874944		-0.043799		-0.0788801	0.118341	-1.72601	-0.638227	-1.27831	-0.792301	-1.03531			none
YKL006W	-0.669285	-0.35414	-2.91236	0.0338299	-0.014786	0.145709	-2.80225	-1.63015	-2.03808	-1.63632	-1.8372	-2.6742		none
YKL020C	0.140163	-0.089314	-0.922204	-0.00411055	0.147651	0.0146479	-1.03268	-0.470399	-0.803359	-0.383966	-0.593663			none
YKL024C	-0.497087	-0.47965	-2.11899	-0.250821	0.042209	0.0615588	-2.41588	-1.16877	-1.51012	-1.40289	-1.4565			none
YKL030W	-0.622058		-2.61245	0.0545388	-0.0669487	0.115574	-1.18403	-0.419113	-0.813846	-0.405017	-0.609431	-1.43186		none
YKL031W	-0.473181				-0.191165		-1.74205	-0.66215	-0.990086	-0.580774	-0.78543			none
YKL036C	-0.057379		-0.022868	0.229147	0.197788	-0.0492598	-0.367126	1.37361	-0.405953	-0.0417718	-0.223862	-1.13675		none
YKL037W	-0.205843		-0.33738	-0.0997934	0.187776	0.117005	-1.342	-0.66021	-1.08071	-0.114937	-0.597825	-1.53425		none
YKL038W	-0.193279		-1.19417	-0.0279197	-0.0165952	-0.0782473	-1.4196	-0.0692613	-0.986533		-0.986533	-1.33919		none
YKL042W	-0.585524			0.0644253	-0.101822		-1.8944	-0.795737	-0.875966	-0.379587	-0.627776	-2.21157		none
YKL043W	-0.769844		-1.38035	0.0597669	-0.053068	-0.0781515	-0.530054	-0.374246	-0.47298	-0.344912	-0.408946	-0.779149		none
YKL044W	-1.30369		-1.88201	0.10964	-0.0773494	0.0171396	-0.696211	-0.190763	-0.441855	-0.37771	-0.409783	-0.429059		none
YKL051W	-1.15414		-2.98708	0.100476	0.0623441	0.127214	-1.84433	-1.82687	-0.924938	-0.613486	-0.769212	-1.41461		none
YKL053W	-0.436541		-2.38883	0.0279249	-0.177889	0.0519683	-1.71173	-0.973339	-0.969212	-0.67369	-0.821451	-2.06481		none
YKL062W	-1.19935	-0.54954		0.222036	-0.0205818	0.0586122	-0.698859	-1.97286	-1.52178	-1.38296	-1.45237	-1.25116		none
YKL066W	-0.2544		-2.75958	0.152444	-0.168489	-0.122106	-2.5211	-0.427322	-1.05965	-0.593371	-0.82651	-2.7693		none
YKL067W	-0.352344	-0.40666	-2.86651	0.16895	-0.301992	-0.119721	-2.47528	-0.604599	-0.930932	-0.649993	-0.790463	-3.00261		none
YKL070W	-0.505944		-1.73915	0.0298383	-0.100808	0.0237065	-1.58455	-0.962187	-1.23225	-0.724781	-0.978515	-1.39066		none
YKL071W	-1.001		-2.07252	0.0497021	-0.241437	-0.0206627	-2.17852	-1.787	-1.45912	-1.38975	-1.42443	-1.96279		none
YKL075C	-0.235481		-2.08825	-0.0268123	-0.292329	-0.115573	-1.64149	-0.759791	-1.4379	-1.04124	-1.23957	-1.71876		none
YKL083W														none
YKL084W	-1.44952	-0.6246		-0.0392831	-0.0393322	0.00873068	-2.63605		-2.59086	-2.14818	-2.36952	-2.55483		none
YKL086W				-0.0459612	0.0500488	0.330324	0.06566	0.591345	-0.139997		-0.139997	-0.482225		none
YKL097C			-1.71236	-0.14801	-0.18843	-0.102969	-1.59885	-0.270876	-0.884942	-0.504921	-0.694931			none
YKL097W-A	-1.57483				-0.174428	0.146765	-1.58895	-1.44623		0.00630298	0.00630298	-1.54447		none
YKL102C	-0.0771		-1.11888	0.150569	-0.0522973	0.0106036	-1.34416	-0.430533	-0.163211	0.49002	0.163405	-0.065818		none
YKL110C	0.178741	-0.25285	-1.27479	0.02879	-0.336258	0.0708644	-1.45709	-1.277	-1.69412	-1.32405	-1.50909			none
YKL111C	-0.0733825		-2.42184	-0.0336454	-0.120094	-0.315937	-1.90855	-1.41421	-1.52087	-0.812308	-1.16659	-2.15066		none
YKL114C	-0.156894	-0.44521	-2.90102	0.0592941	-0.0777371	-0.0656721	-2.74179	-1.62306	-1.82591	-1.13411	-1.48001	-2.71277		none
YKL118W	0.213468		-1.47217	0.118168	-0.112721	-0.201142	-2.24889	-0.705233	-1.34036		-1.34036	-2.13772		none
YKL123W	0.372017	-0.086307	-1.13956	0.01207	0.477462	0.185362	-1.43817	-0.109473	-1.16478	-0.119885	-0.64233	-1.62451		none
YKL127W	-1.08865	-0.35269	-4.04532	-0.0130493	0.00707479	-0.110234	-3.09524	-2.61794	-2.47158	-2.11281	-2.29219	-3.22293		none
YKL131W	-1.2442		-3.18753	-0.103871	-0.164232	-0.00845841	-2.51722	-1.52746		-1.5182	-1.5182	-2.69083		none
YKL132C	-1.0325		-2.87359	-0.0943579	-0.230343	0.0257025	-2.19405	-1.23015	-1.54461	-1.43359	-1.4891	-2.44315		none
YKL136W	0.26926		-1.01731	0.139433	-0.00673986	-0.056028	-1.0869	-0.262859	-0.823126	-0.251567	-0.537346	-1.3207		none
YKL137W	0.0902866		-1.75138	-0.0580913	-0.201055	0.088734	-2.28539	-0.766871	-1.21672	-0.577955	-0.897338	-2.45578		none
YKL145W		-0.094091	-1.52505	0.0609773	-0.0311362	-0.0846051	-1.06506	-0.581614	-0.621347	-0.618483	-0.619915	-1.70569		none
YKL147C	0.0555022		-2.06268	-0.194659	0.220486	0.0895155	-1.85631	-0.712362	-1.09178	-0.593442	-0.842613	-1.90516		none
YKL153W														none
YKL156W	-0.459114	-0.44582	-1.77178	0.111586	-0.0484958	0.332279	-2.24421	-0.932421	-1.37346	-1.09964	-1.23655	-2.04093		none
YKL158W	-0.998331		-3.59469	0.0322278	-0.149458	-0.181508	-2.7471	-2.40965	-2.12158	-2.05788	-2.08973	-2.47032		none
YKL161C	-1.03501		-2.65624	-0.0190638	0.148854	0.073735	-1.43981	-1.40909	-1.16849	-0.637617	-0.903051	-0.833045		none
YKL166C	-0.175976		-2.03958	-0.0535359	-0.390875	-0.170447	-2.62556	-1.46182	-1.88876	-1.33303	-1.6109	-2.82062		none
YKL168C		-0.44628	-1.77673	0.0195823	0.0788532	-0.160288	-1.12603		-0.703553	-0.0316538	-0.367603			none
YKL169C	-0.314181	-0.83428	-2.12628	-0.125195	0.0217908	0.239467	-1.75584	-0.678021	-1.04978	-0.202855	-0.626319	-1.61954		none
YKL177W	-0.733524		-4.37144	0.0569835	0.379939		-2.68184	-2.26391	-1.58159	-1.47714	-1.52937	-3.53855		none
YKL180W		-0.4022	-2.83579		-0.0424044	-0.0078614						-2.746		none
YKL182W	-1.29785	-0.81113	-4.43656		-0.0218261	-0.019734	-3.57923	-2.25724	-2.28541	-1.8343	-2.05985	-3.55757		none
YKL199C	-0.410766	-0.38902	-2.11672	-0.0542324	-0.0390933	1.56364	-2.02433		-1.27915	-0.771191	-1.02517			none
YKL200C	-0.544252		-2.91843	-0.0895622	0.068977	-0.103904	-1.52686	-1.56326	-0.292599	0.492359	0.09988			none
YKL202W	0.297847		-1.71596	-0.0208998	0.42563	0.120811	-1.22286	-0.641895	0.027301	0.726862	0.377082	-1.28746		none
YKL223W	-1.001			-0.0331489	-0.038789	-0.15929	-1.93378	-0.918319	-1.57776	-1.33457	-1.45617	-1.75623		none
YKL224C	-0.990178	-0.54998	-1.77821	-0.0775652	-0.00136881	0.147304	-1.88007	-1.57671	-1.63494	-1.57412	-1.60453	-0.934287		none
YKL225W	-0.174343		-0.225039	0.121564	-0.145236	-0.0920998	-1.48895	-0.509731	-1.38442	-0.967501	-1.17596	-1.18702		none
YKR005C	-0.845616			-0.0345785	-0.0753597	-0.218568	-1.91961		-1.54213	-1.36696	-1.45455	-1.81121		none
YKR012C	-1.44061		-4.7402	0.170411	-0.0284548	0.175551	-2.1773	-1.6	-0.57413	0.0846516	-0.244739	-1.92884		none
YKR032W	-0.460534		-1.85276	-0.0423372	-0.230895	-0.206299	-1.30007		-0.871698	-0.27142	-0.571559	-1.46484		none
YKR033C	-1.46291			-0.0406224	-0.00420767	0.25884	1.94269	1.83627	1.61325	1.39297	1.50311			none
YKR034W			-3.04345	-0.203525	0.0899326	0.036001	1.99736		1.42752	1.25116	1.33934			none
YKR035C	0.188098		-1.18404	0.0390674	-0.0763978	-0.0131597	-1.09581	-0.160328	-0.509762	0.129367	-0.190198	-1.63065		none
YKR036C	-0.242022	0.12409	-2.16317	0.225655	0.0853596		-2.05065	-1.09543	-1.11971	-0.663974	-0.89184	-2.0388		none
YKR040C	-0.442292		-2.08703	-0.180489	0.0323662	-0.000708375	-1.49722		-0.920732	-0.79405	-0.857391	-1.46633		none
YKR047W	0.129644		-1.46675	-0.155247	-0.057893	-0.0697583	-1.83231	-0.863025	-1.42848	-0.998165	-1.21332	-1.9728		none
YKR057W	-0.385704	-0.44425	-2.00812	0.0378657	-0.141506	0.0929463	-2.52051	-1.50287	-2.07791	-1.6355	-1.85671	-2.40264		none
YKR072C	-0.135816	-0.30704	-2.06919	-0.00766867	0.252906	0.0443705	-1.03785	-0.701024	0.167039	0.718932	0.442986	-1.48527		none
YKR073C	-0.516787		-2.124		0.00228253	0.272756	-1.41685	-0.655806	-1.11734	-0.745584	-0.931464	-1.42435		none
YKR094C	-0.376563	0.049091	-2.44039	0.135907	-0.0504395	0.0674618	-2.91701	-1.87704	-2.27362	-1.52863	-1.90112	-2.5402		none
YKR102W	-0.631353		-2.08833	0.34498	-0.0741476	-0.0740358	-2.16269	-0.746922	-1.54836	-2.0441	-1.79623			none
YKR103W	-0.495012		-1.78381	-0.0335607	-0.09067	-0.189692	-1.89818		-1.19815	-0.687854	-0.943002	-1.6567		none
YKR104W	-0.430567		-1.6946	0.167485	-0.119442	0.0413243	-1.89794		-1.37597	-1.13132	-1.25365	-1.42372		none
YKR105C	-0.618508		-2.32725	0.033882	-0.302467	0.000805995	-1.39885	-0.989413	-1.39787	-0.816225	-1.10705	-1.4599		none
YKR106W	-0.776794	-0.14417	-2.49082	-0.0776174	0.0464343	0.0702153	-1.34042	-1.01413	-1.00816	-0.807042	-0.907599	-1.37418		none
YLL005C	-0.0380156		-1.36381	0.0237924	-0.00040778	0.0796127	-1.16197	-0.659007		-0.601849	-0.601849	-0.44615		none
YLL016W	-0.685624		-2.93553	-0.0710423	0.171971	0.324712	-2.51284	-1.73516		-0.797817	-0.797817	-1.90983		none
YLL017W	-0.7302		-2.85078	0.0924655	0.0107206	0.133556	-1.74542			-0.908115	-0.908115	-1.52572		none
YLL019C	-0.21984		-1.77902	-0.082562	0.030894	0.0753104	-0.297143	-1.17564	-0.400832	0.44423	0.0216993	0.116438		none
YLL026W	0.170866	0.47667			-0.703286	-0.38161		1.4949		-0.115334	-0.115334			none
YLL030C	-0.360005			0.154174	0.0535518	-0.228499	-1.31168	-0.203821	-0.658434	-0.244264	-0.451349	-1.09312		none
YLL037W	-0.272143		-1.39691	0.0149542	-0.0473537	0.0765005	-1.27731	-0.830856	-1.1949	-0.589939	-0.892417			none
YLL039C	0.584859	0.71987	-0.705716	0.0867562	-0.317735	-0.111709	-0.060764	-0.0471518	-0.263906	-0.0686953	-0.166301	0.080304		none
YLL044W						0.0473856								none
YLL045C	-0.529919	-0.33987				-0.0183316		-1.30553		-1.18725	-1.18725			none
YLL046C	0.435275			0.0523178	0.0203892	-0.072647		-0.033337	-0.752285	-0.26947	-0.510878	-0.161643		none
YLL047W	0.853876		-1.75186		-0.116981	0.114728	-1.01322	-0.411683	-0.493979	0.139683	-0.177148	0.291132		none
YLL052C	-1.26805		-1.43292	-0.00749445	-0.218003	-0.088028	0.318428	-0.163436	0.343663	1.12397	0.733816	0.980619		none
YLL057C	-1.16035		-2.50141	0.0430355	-0.206817	0.0222971	-1.39998		-1.2693	-1.14106	-1.20518	0.225829		none
YLL059C	-0.764539			0.109886	-0.0503475	0.0510035	-1.96313	-1.19616	-1.55397	-0.772712	-1.16334	-1.62215		none
YLL060C	-0.51964		-2.38073	-0.0831306	-0.0924156	0.0955752	-1.78806	-1.19138	-1.4086	-0.755386	-1.08199	-1.14871		none
YLL064C	-1.10035	-0.95002	-1.89326	-0.154814	-0.11833	-0.0497758	-2.12466	-1.66034	-1.60866	-1.64537	-1.62701	-1.25649		none
YLL065W	-0.161418		-0.280552	-0.146922	0.00226458	0.20193	-1.79238	-0.726559	-1.25716	-1.05704	-1.1571	-1.54147		none
YLL066C	-0.745384		-3.428	-0.0748356	0.0293588	0.0662314	-3.12384	-2.67704	-2.27375	-1.80949	-2.04162	-2.8282		none
YLL067C	-0.697595	-0.42798	-3.51206	0.0348207	-0.0305378	-0.0678385	-2.71694	-2.54284	-2.09266	-1.68637	-1.88951	-3.0232		none
YLR012C	0.555043		-0.537319	0.0775703	-0.02178		-1.31673	-0.408312	-0.909036		-0.909036	-1.00761		none
YLR013W	-0.467155		-1.64082	0.0263587	-0.00408454	-0.108654	-1.58936	0.0134066	-0.970387	-0.802211	-0.886299	-1.27883		none
YLR029C	-0.383915	-0.1902												none
YLR030W	-1.25244		-2.946	-0.101092	-0.194163	0.0119009	-2.20899	-1.95789	-1.4385	-1.27543	-1.35697	-1.27174		none
YLR031W	-0.708028		-2.2182	-0.0209738	-0.167977	-0.192445	-1.70024	-0.76763	-1.13794		-1.13794	-1.30337		none
YLR037C	-0.677836	-0.95043	-1.25814	0.0717203	-0.00601683	0.0966665	-0.775058	-1.02518	-1.25919	-0.894822	-1.07701	-0.209794		none
YLR041W	-0.992292		-4.24604	0.293438	0.104156	0.144619	-4.47397	-2.83649	-3.01027	-2.55886	-2.78457	-3.31341		none
YLR042C	-1.10762	0.56888	-3.67232	0.0681848	-0.0885793	-0.0506126	-3.25987	-2.50864	-1.74712		-1.74712			none
YLR046C	-0.48408		-2.04941	0.081886	0.0184268	0.0506116	-1.6202	-1.20414	-1.20371	-0.980201	-1.09196	-0.426302		none
YLR047C	-0.412953		-1.74429	0.116215	-0.0710632	-0.0676259	-1.30671	-0.480478	-0.933744	-0.349546	-0.641645	-0.514869		none
YLR048W	-0.654711	-0.51773			-0.0297614		-2.49619		-2.00056		-2.00056	-1.85994		none
YLR054C	-1.14751		-2.85077	-0.0287064	-0.141362	0.220417	-1.6546	-1.44556	-1.27459	-0.78207	-1.02833	-0.471612		none
YLR061W	-0.317396	-0.45196	-2.14712	0.115147	-0.115778	0.152691	-2.10707	-1.38264	-1.79185	-1.69613	-1.74399	-0.91637		none
YLR062C			-2.83751		-0.00847388		-2.66367	-2.2136	-2.14291	-2.04451	-2.09371	-1.75238		none
YLR075W		-0.094099						-1.66506						none
YLR076C		-0.65226												none
YLR095C		-0.20583		0.307672										none
YLR101C	-0.522683	-0.41305	-3.43604	-0.207449	-0.0443442	0.0103084	-3.03439	-2.6974	-2.21352	-1.80905	-2.01129			none
YLR102C	-0.0559733		-1.88844	-0.0286466	-0.0189039	-0.0485896	-1.5098	-0.672909	-1.33238	-0.811882	-1.07213	-1.08987		none
YLR111W	0.642516		0.119507	0.0674826	-0.143599	0.0370151	-1.36403	-0.263192	-0.90654	-0.408082	-0.657311	0.16193		none
YLR112W	0.107327		0.206531	0.128183	-0.120804	-0.0439122	-0.938655	-0.561652	-0.422303	-0.0192234	-0.220763	0.681013		none
YLR122C	-0.839981		-2.49256	-0.00962957	0.108866	0.0849382	-1.50706		-1.17002	-0.67153	-0.920776			none
YLR123C	-1.85186		-2.41697	-0.139562	0.037364	0.195928	-1.65606		-1.31149	-0.784398	-1.04795	-0.334501		none
YLR124W	-0.962843		-2.73092	0.0161508	0.26322	0.209411	-1.83163	-0.680195	-1.3955	-0.804365	-1.09993	-1.28771		none
YLR125W	-0.482174		-2.19755	-0.146511	-0.059596	0.0284302	-1.30699	-0.546383	-0.868987	-0.186762	-0.527874			none
YLR130C	-1.02617	-0.64616	-3.28543	-0.180993	0.00437345	-0.0664827	-1.91259	-2.1051	-1.3565	-1.07299	-1.21475	-1.02798		none
YLR131C	-0.397547		-1.94665	-0.0191141	-0.0628626	-0.0128022	-2.07109		-1.27656	-0.749623	-1.01309	-1.76702		none
YLR132C	-0.1816		-2.08691	-0.160694	-0.147649		-1.56031	-0.63515	-1.26178	-0.707169	-0.984473	-1.42689		none
YLR140W			-2.48353	0.181923	-0.0659394				-1.53163	-1.24702	-1.38933	-1.51534		none
YLR141W	-0.360562		-2.77262	0.00834357	-0.0131492	0.404661	-1.85566	-0.267524	-1.27079	-1.39342	-1.33211	-1.36378		none
YLR155C	-0.518518		-2.3898	-0.0249973	0.0641017	0.23342	-1.55685	-1.27277	-0.9728	-0.850608	-0.911704	-0.903374		none
YLR156W	-0.592348		-2.44208	0.0882693	0.0690023	0.16371	-1.53977	-1.45301	-0.94896	-0.917176	-0.933068	-0.95386		none
YLR157C	-0.519862		-2.42272	0.0477791	0.200046	0.243402	-1.68678	-1.35975	-0.959705	-0.846548	-0.903127	-0.908509		none
YLR158C	-0.509268		-2.51842	0.0553256	0.0664462	0.233847	-1.60391	-1.52893	-1.06074	-0.85498	-0.957861	-0.902705		none
YLR159W	-0.858711		-2.2429	-0.0306427	-0.0765793	0.119872	-1.45948	-1.41803	-1.29316	-0.85791	-1.07554	-0.649884		none
YLR160C	-0.430859		-2.32362	-0.0326783	0.0225583	0.118484	-1.62343	-1.35469	-1.12191	-0.800726	-0.96132	-0.923715		none
YLR161W	-0.904521		-2.29544	-0.0738878	-0.0044236	0.0613822	-1.43745	-1.4766	-1.32921	-0.899051	-1.11413	-0.514205		none
YLR162W	-0.713943		-1.72933	-0.0963463	-0.426144	-0.510774	-1.08915	0.152835	-0.41407	-0.2039	-0.308985	-1.03998		none
YLR167W		-0.3086												none
YLR169W	0.107356		-2.58829	0.0464771	-0.0629406	-0.0149932	-1.85184	-1.4622	-1.41947	-1.22081	-1.32014	-1.33449		none
YLR171W	-0.0750539		-3.15658	-0.00623485	-0.172786	-0.122522	-1.83273	-1.67604	-1.51105	-1.08058	-1.29582	-1.21972		none
YLR184W	-0.321466			0.0349678	0.0223049	-0.0610316	-1.18616	0.397927	-0.615471	0.00323369	-0.306119	-0.916131		none
YLR185W	-0.718128	-0.45827	-2.6548	0.129946	-0.174746	0.0852677	-2.54465	-1.66499	-1.85646	-1.61721	-1.73684	-1.56275		none
YLR198C	0.162821	-0.53173	-1.79676	-0.00619929	0.397307	0.0415822	-1.70584	-1.20496	-1.47938	-1.00259	-1.24099	-0.764988		none
YLR199C	0.0672674	0.28069	-1.47088	0.135136	-0.124909		-1.17923	-0.666318	-1.04206	-0.706125	-0.874092	-0.673499		none
YLR201C	-0.19068	-0.32126	-2.12714	0.0981258	0.0548087	0.162797	-1.32029	-0.689957	-1.2769	-0.837777	-1.05734	-0.815956		none
YLR202C	-0.0536143			0.383264	-0.0208988	-0.0335618	-1.26103			-0.486652	-0.486652			none
YLR203C	-0.128655	-0.29818	-1.87737	-0.00747978	0.0285769	0.00891573	-1.3796	-0.663729	-1.11947	-0.802178	-0.960824	-0.927977		none
YLR217W			-0.747324	0.0948597	-0.195689	0.0675219	-0.355473	0.292563	-0.18883	-0.354857	-0.271843	0.076368		none
YLR223C	0.439332	-0.40752	-0.927029	-0.0770609	-0.238832	-0.0564677	-1.86251	-0.393992	-1.14606	-0.430901	-0.78848	-0.729361		none
YLR225C	0.594405	-0.44698	0.050817	0.0533993	0.175354	-0.0311665	-0.364211	1.27696	-0.186735	0.520909	0.167087	0.148171		none
YLR228C	-0.365772	-0.49162	-2.31592	0.0612734	-0.0389007	0.11536	-2.21353	-1.53261	-1.65449	-1.26014	-1.45732	-1.80096		none
YLR230W	-0.271668		-2.33577	0.0986218	-0.0233946	0.237746	-2.14359	-1.40997	-1.54584	-1.11669	-1.33127	-1.67409		none
YLR231C	-2.22154		-4.62882	-0.124239	-0.299539	-0.236713	-3.09456	-2.58876	-2.5729	-2.37967	-2.47628	-2.53075		none
YLR232W	-1.99555		-4.18156	-0.127923	-0.229898	-0.197098	-2.60709	-2.55805		-2.18057	-2.18057	-2.27276		none
YLR235C			-2.83236	-0.0907595	-0.0728721	0.13178	-2.39661	0.269388	-1.56223	-1.14897	-1.3556	-1.69382		none
YLR236C	-0.485381		-2.82594	-0.13142	0.0502904	0.270659	-2.35016	-1.79407	-1.4658	-1.09793	-1.28186	-1.87779		none
YLR252W	0.213779	-0.409	-0.617245	-0.0275166	-0.124422	-0.125228	-1.22164	0.10438	-0.347297	-0.0663604	-0.206829	-0.618762		none
YLR255C	0.624015		0.229181	0.0265254	0.202137	0.136488	-0.685092	-0.385566	-0.299089	0.476177	0.0885439	-0.25		none
YLR256W	0.022707	-1.0949	-1.40257	-0.0442824	0.0344221	-0.12736	-1.02676	-1.13528	-0.509131	-0.152555	-0.330843	-0.615667		none
YLR262C	0.184249	0.24861	-1.19697	-0.275603	-0.0739202	-0.141494	-1.19766	-0.573453	-1.1121	-0.43989	-0.775993	-0.923498		none
YLR264W	-0.909548	-0.49069	-3.38345	0.166946	-0.462868	-0.108407	-2.67249	-2.55465	-2.44961	-2.40544	-2.42752	-2.12779		none
YLR269C	0.544854		-1.40483	0.231169	0.0743614	0.00527457	-1.14693	-0.47875	-0.756277		-0.756277	-0.835202		none
YLR279W	-0.0813181		-1.2559	-0.129034	-0.170584	0.0833181	-1.70599	-0.935946		-1.15153	-1.15153	-0.724613		none
YLR281C	-0.280765		-1.35407	-0.241328	-0.141993	0.0278989	-1.7663	-0.800716	-1.47709	-1.12353	-1.30031	-0.747996		none
YLR282C	-0.357966		-2.39039	-0.073065	-0.0201089	0.0205752		-1.14385	-1.29043	-0.927012	-1.10872	-0.896568		none
YLR283W	-0.261503	-0.025321	-2.05388	-0.00859231	0.0338099		-1.16019	-1.10995	-1.1317	-0.793124	-0.962414			none
YLR286C	-1.19252	-1.1539	-3.49508	0.017833	0.0773573	0.146119		1.05754		0.825074	0.825074	0.756526		none
YLR287C-A	0.048484		-1.14949	0.110617	-0.252682	0.0533221	-1.88627	-0.501548	-1.02024	-0.77009	-0.895166	-1.06732		none
YLR295C	-0.135666	0.033114	-1.87351	0.23794	-0.296518	0.0834353	-1.58926	-0.898845	-0.897899	-0.482774	-0.690336	-0.956384		none
YLR296W	-0.255064			0.00071611	-0.117473	-0.0194092	-1.41348	-0.108727	-0.465655	-0.592962	-0.529309			none
YLR301W	0.324889	0.0098414	-2.044	-0.00839394	-0.464153	-0.181852	-2.66671	-2.14095	-1.7642	-1.84604	-1.80512	-2.36739		none
YLR302C	0.212491			0.147044	0.0855507	-0.0170272	-1.24035	0.316364	-0.459025	0.228888	-0.115069	-0.333093		none
YLR307W	-1.09221		-3.11396	-0.0773049	-0.109241	0.0346686	-1.70321	-1.73036	-1.63439	-2.07283	-1.85361			none
YLR308W	-0.430017		-1.61169	0.0464436	-0.221011		-1.37205	-0.1963	-0.80668	-0.353974	-0.580327	-1.47442		none
YLR311C	0.125165		-1.54193	0.224371	-0.00283988		-1.29134	-0.756148	-0.653971	-0.00135728	-0.327664	-0.521411		none
YLR315W	-0.619332		-2.44392	-0.12135	0.00416442	0.145155	-1.84193	-1.53484	-1.40301	-0.944957	-1.17398	-1.27315		none
YLR317W	-0.0975345		-2.06004	-0.021648	0.0768778	0.163487	-1.81791	-1.64225	-1.58444	-1.31771	-1.45108	-1.0114		none
YLR318W														none
YLR322W	-0.126533		-1.18371	0.0216361	0.00360699	-0.0627014	-1.25199	-0.528759	-1.01644	-0.244191	-0.630314	-0.498351		none
YLR325C		-0.30962				0.0452249								none
YLR329W	-0.107329		-1.30016	0.148493	-0.0565436	0.066384	-1.27366	-0.535164	-1.06572	-0.463257	-0.764487	-0.926086		none
YLR331C	-0.245087		-1.80039	0.0160055	0.0761394	0.0843346	-0.292564	-0.0981115	-0.19289	0.0136991	-0.0895954	0.597488		none
YLR333C		-0.24367			-0.00435009									none
YLR334C	-0.497286		-2.0455	0.0153522	-0.154559	-0.0835028	-2.31658	-1.02892	-0.803618		-0.803618	-1.57307		none
YLR338W	-0.263918		-2.41467	-0.153862	0.225076	0.139216	-1.19382	-0.65949	-0.612448		-0.612448	-0.605667		none
YLR339C	-0.372384		-2.4047	0.0326511	-0.0281879	-0.0603525	-2.33009	-1.86723	-2.09618	-1.74281	-1.91949	-1.51355		none
YLR341W	-0.746493		-2.43589	0.0540789	-0.156655	-0.0325807	-2.21482	-1.86422	-1.74596	-1.34994	-1.54795	-1.58667		none
YLR342W	-0.956748	-0.10229	-3.32435	0.0150802	-0.171295		-2.06613		-1.24124	-1.07566	-1.15845	-1.17947		none
YLR343W	-0.458742		-1.31412	0.0842772	-0.153879	-0.0909204	-0.910942	-0.579299	-0.782026	-0.17716	-0.479593	-0.447454		none
YLR349W	-0.515666		-3.54899	-0.143444	0.0417506	0.0778002	-1.77228		-1.25755	-1.13748	-1.19751	-0.781113		none
YLR358C	-0.167816		-1.32501	0.0315781	0.0458805	0.0630153	-1.35205	-0.539726	-1.10005	-0.561841	-0.830945	-0.766517		none
YLR365W	-0.726644			0.025761	-0.0372465	-0.0288027	-1.52606	-0.559625	-1.25901		-1.25901	-1.2625		none
YLR366W	-0.305975		-2.19757	-0.15524	0.40787		-1.79488		-1.41382	-0.386072	-0.899948	-1.29958		none
YLR367W	-0.375039	-0.13963	-2.18161		-0.328001	-0.0620388	-2.38502	-1.75373	-2.13013	-1.73445	-1.93229	-2.09641		none
YLR374C	-0.88916		-2.52813	0.0655311	-0.10959	0.189571	-1.1845	-1.25196	-0.481135	-0.426097	-0.453616	-0.597348		none
YLR379W	-0.579302		-3.16094	0.0193658	0.0721348	0.0666553	-2.53947	-1.94421	-1.87144	-2.06681	-1.96912	-1.71534		none
YLR385C	-1.15085		-3.38847	0.00334457	-0.0618002	-0.140013		-2.00587	-1.59638	-1.16781	-1.3821	-1.50809		none
YLR391W-A	-0.161787		-1.55597	0.273328	-0.0052352	0.159546	-0.982662	-0.588627	-0.528114	-0.349306	-0.43871	0.341623		none
YLR394W	-0.0714423		-1.14646	0.382617	0.375276	0.0943348	-1.58637		-0.87657	-0.369668	-0.623119	-0.798987		none
YLR400W	0.112665		-1.42007	0.15001	-0.0172405	0.0529102	-1.64871	-0.775697	-1.3814	-0.85435	-1.11787	-0.743604		none
YLR402W	-0.731779			0.348341	-0.19015	-0.0283186	-1.36474	-0.75618	-0.83448	-1.03914	-0.936808	-0.777437		none
YLR403W	-0.297616	-0.33308	-1.80546	0.000868582	-0.0500073	-0.0183695	-1.64727	-0.689808	-1.10137	-0.657984	-0.879677	-0.755028		none
YLR406C		-0.4131												none
YLR411W	-0.573268		-1.83559	0.0267975	0.0295768	0.104799	-1.7898		-1.52952	-0.924843	-1.22718	-1.0622		none
YLR413W	-1.17724	-1.0227	-5.04502	0.048288	-0.15869	0.17739	-4.231	-3.01768	-2.75269	-2.35882	-2.55576	-3.44482		none
YLR415C	-0.274316		-1.46276	-0.104133	0.350096	-0.0685105		-0.546091	-0.711616	-0.380224	-0.54592	-0.086021		none
YLR416C	-0.20955		-1.54162	-0.0079169	0.290437	-0.0316136	-1.26927	-0.293798	-0.836977	-0.340859	-0.588918	-1.13286		none
YLR428C	-0.140003		-2.25165	0.0108383	0.171078	0.0467534	-2.04218	-1.32697	-1.37689	-1.05753	-1.21721	-1.65799		none
YLR433C	-0.269977		-1.99399	-0.00583784	0.0139265	-0.012452	-1.93425	-0.939847	-1.38908	-1.01089	-1.19998	-1.55205		none
YLR434C	-0.397518		-1.77001	0.0457203	0.083006	-0.0967932	-1.47237	-0.789685	-1.11876	-0.663213	-0.890989	-0.79843		none
YLR441C	-0.728991	-0.43844	-3.05578	0.376978	-0.459677	-0.150897		-2.09034		-1.94805	-1.94805			none
YLR442C	-0.357942	-0.37995	-2.10867	0.0303491	0.10429	0.159655	-1.28609	0.676926	-1.05243	-0.623314	-0.837874	-0.686334		none
YLR444C	-0.13132		-1.24082	-0.0591654	0.0263914	-0.00170953	-1.81713	-1.64424	-1.88844	-1.51791	-1.70318	-0.883619		none
YLR445W	-0.837878			-0.0608269	-0.0221392	-0.0666834	-1.82981	-1.14386	-1.29353	-1.38575	-1.33964			none
YLR448W	-1.16051	-0.44461	-3.27542	0.159108	-0.0765945	-0.13654	-2.46391	-2.13803	-2.0575	-2.05255	-2.05503	-1.62347		none
YLR450W				-0.11086	0.0489661		-1.25887		-1.08142		-1.08142			none
YLR458W	-0.0081074		-2.7055	-0.107272	0.0442496	0.1153	-1.76527	-1.20373	-1.06248	-0.522977	-0.792726	-1.36711		none
YLR460C	-0.196688	0.066236	-2.04369	0.021716	0.0168002	0.0524065	-1.56381	-1.02401	-0.995127	-0.995593	-0.99536	-0.72043		none
YLR461W	-1.23734	-0.80694	-2.10886	-0.0785461	-0.137879	0.149624	-2.03481	-1.95704	-1.71257	-1.93467	-1.82362	-1.5224		none
YLR462W	-0.751048		-3.1472	-0.160411	-0.0356987	-0.130587	-2.46682	-2.42647	-1.76748	-1.71568	-1.74158	-2.36017		none
YLR463C	-0.611913		-2.88704	-0.15397	-0.059624	-0.102498	-2.37069	-2.45564	-1.79229	-1.6604	-1.72635	-2.29173		none
YLR464W	-0.756283		-3.10841	-0.208737	0.0479425	-0.0847244	-2.46618	-2.37401	-1.73212	-1.7145	-1.72331	-2.31117		none
YLR465C	-0.666632		-2.86323	-0.0408309	0.0442787	-0.145237	-2.40491	-2.1328	-1.55169	-1.19484	-1.37326	-2.15192		none
YLR466W	-0.745268	-0.41658	-3.43493	0.0388143	0.0154527	-0.0258564	-2.45658	-2.52345	-1.87334	-1.81959	-1.84647	-2.75435		none
YLR467W	-0.804188	-0.43669	-3.30866	-0.0718216	0.139733	0.0370945		-2.19646	-1.88883	-1.80699	-1.84791	-2.67824		none
YML001	-0.52473	-0.22694	-2.67003	-0.137538	-0.282556	-0.0738839	-2.34569	-1.67279	-1.9091	-1.431	-1.67005	-2.64285		none
YML002W	-0.413531	-0.3536	-2.15822	-0.0067073	-0.107851	0.0478345		-1.10096	-1.53329	-0.90315	-1.21822	-1.69178		none
YML003W														none
YML009C	-0.0928188	0.01677	-2.32078	0.104634	-0.0679008	0.197561	-1.49905	-0.648141	-1.4396	-0.798544	-1.11907	-1.83963		none
YML010W	-0.243756	-0.22351	-2.27304	-0.0720006	0.135994	-0.0266006	-1.86064	-1.28492	-1.27337	-1.04195	-1.15766	-2.13892		none
YML010W-A	-0.523151	0.14557	-2.2925	0.0683773	-0.410319	0.0952032	-1.53508	-0.930332	-1.00548	-0.635996	-0.820736	-1.64679		none
YML013C-A	0.29627		-0.870406	-0.00923936	0.0935876	0.081658	-1.23624	-0.331923	-0.801064	-0.394292	-0.597678	-1.33636		none
YML017W														none
YML024W	-0.784176	-0.42906			-0.217748									none
YML026C	-0.699062	-0.56411	-3.06799	0.0884815	-0.195896	-0.00015586	-3.07682	-2.23262	-2.40514	-1.83878	-2.12196	-3.01561		none
YML032C-A	0.198608		-1.11482	0.0687524	0.0931451	0.0370087	-1.40073	-0.493431	-0.868249	-0.373655	-0.620952	-1.40516		none
YML033W	0.196902	0.60369	-2.17554	0.196929	-0.0805678	-0.0779744	-2.15776	-1.52598	-1.6321	-1.03133	-1.33171			none
YML035C-A	-0.190446		-2.70744	0.0157571	0.0479427	-0.147808	-2.0674	-0.416126	-1.34013	-1.23906	-1.28959	-2.68287		none
YML039W		-2.5535	-1.545											none
YML040W		-2.461												none
YML045W		-2.0379												none
YML047C	-0.849431			0.158621	0.295071		0.343387		0.699945	1.1169	0.908424	-0.795056		none
YML048W-A	-0.688075		-1.79222	0.0297467	0.153409	0.258555	-0.185087	-0.436503	0.435208	0.663891	0.54955	-0.902547		none
YML058C-A	-0.587891		-2.24703	0.0348723	0.132764	0.031658	-1.50779	-0.916607	-1.00653	-0.425138	-0.715833	-1.88116		none
YML063W	-0.729295	-0.29935	-2.99596		-0.0764143	0.0421362				-1.51481	-1.51481			none
YML066C	-1.08629		-2.47457	-0.0783735	-0.0389929	-0.108781	-1.75744	-1.22673	-1.09894	-1.00422	-1.05158	-1.79152		none
YML073C	-0.992041	-0.6258	-3.17074	0.0269467	-0.11755	-0.146182	-2.55401	-1.95497	-2.01203	-1.9575	-1.98477	-2.37074		none
YML078W	-0.521645	-0.13805	-2.52455	-0.0203522	-0.0544737	-0.0786482	-1.9941	-1.21301	-1.30528	-1.0917	-1.19849	-2.23416		none
YML079W	-0.0311275	-0.36235	-2.04891	-0.0376705	0.00359123	0.181528	-1.8422	-0.712129	-1.0129	-0.821621	-0.917259	-2.01471		none
YML083C	-0.113479		-1.51718	-0.12281	-0.0119029	-0.041047	-1.94124	-0.973354	-1.30208	-1.44665	-1.37436	-1.82053		none
YML084W				-0.123779	0.0628992	0.0170159	-1.601	-0.670415	-0.789441	-0.540313	-0.664877	-1.43942		none
YML089C	-0.297683		-1.09569	-0.0312817	0.0602275	0.553622	-1.26038	0.200804	-0.802312	-0.0301	-0.416206	-1.0234		none
YML090W			-2.16338	0.132527	0.237576	-0.0569722	-1.27811	-0.900797	-0.441589	0.46284	0.0106256	-0.954464		none
YML095C-A	-0.143392			0.0262477	-0.012824	0.134209	-2.02359	-1.16019	-1.58821	-0.955083	-1.27165			none
YML101C	0.282062	0.11417	-0.336746	-0.195913	-0.0946635	0.015944	-1.09913	-0.699583	-1.3258	-1.02592	-1.17586	-1.38981		none
YML102C-A	-0.351344		-2.23892	-0.128034	-0.00544343	0.118953	-2.57745	-1.70986	-1.82296	-1.2902	-1.55658	-2.0691		none
YML117W	-0.23894	-0.2894	-1.56441	-0.0624758	0.237278	-0.00482155	-1.38609	-0.509135	-0.805636	-0.127523	-0.46658	-1.32229		none
YML122C	-0.530623		-1.58907	0.0502069	-0.17244	0.0855602		-0.81146	-1.16301		-1.16301	-1.7965		none
YML123C	-1.08016	-2.5508	-2.66826	0.0501789	-0.291588	-0.0518501	-2.42889	-1.53761	-1.07616	-0.571004	-0.823581			none
YML131W	0.506486	-0.31496	-0.423011	-0.0717737	0.0307213	-0.0329125	-0.090796	0.305402	-0.384444	0.118387	-0.133029	0.253696		none
YML132W	-0.325324	-0.55423	-2.46411	0.0776968	-0.26314	-0.0565236	-1.79676	-1.67807	-1.53821	-1.28654	-1.41237	-1.48806		none
YML133C	-0.508155	-0.53897	-3.59641		0.17915	0.0412872	-2.77562	-2.75015	-2.09931	-1.76762	-1.93347	-2.83953		none
YMR001C	-0.203457	-0.012246	-2.3804	0.0924313	-0.218293	-0.16064	-2.62473	-1.3593	-1.67967	-1.4905	-1.58509	-2.37161		none
YMR006C	-1.32357	-0.74638	-4.02468	-0.110607	0.00942627	-0.0633932	-2.88683	-2.61008	-1.9936	-1.50818	-1.75089	-2.74291		none
YMR007W	-0.171472			0.200838	-0.0373568		-1.60897	-0.968952	-1.1627		-1.1627			none
YMR013C	-0.510134	0.14959	-1.93682	0.0270076	-0.420816	-0.170395	-2.10946	-1.16059	-1.51739	-1.19616	-1.35678	-1.79583		none
YMR017W	-0.622728		-1.0361	-0.116321	0.230891	0.294544	-1.5617	-0.959641	-1.29117		-1.29117			none
YMR018W	-0.655222		-2.19659	-0.111978	-0.155838	-0.00528836	-2.05361	-1.94747	-1.20358	-0.967082	-1.08533			none
YMR031W-A	-0.473847		-2.03421	-0.028252	0.0202255	-0.192719	-1.39759	-0.395911		-0.244586	-0.244586	-1.71724		none
YMR032W	-0.0333447	0.13339	-2.63399	0.00913954	0.0604149	0.141793	-2.17611	-1.55088	-1.29972	-1.054	-1.17686	-3.13029		none
YMR045C	-0.716485		-2.03439	0.0505642	-0.113159	-0.139737	-1.39274	-0.409568		0.446232	0.446232	-1.60579		none
YMR046C	-0.911441	-2.2331	-2.51201	0.010589	-0.0759449	0.0429236		-0.391731		0.297469	0.297469			none
YMR050C	-0.721257	-0.49515	-2.12536		-0.0455463	-0.126709		-0.523956		0.34908	0.34908			none
YMR051C		-2.2801												none
YMR053C	0.0843713		-1.16597	-0.0348416	0.37004	0.0210316	-1.1006	-0.089708	-0.81012	0.0806208	-0.36475			none
YMR057C				-0.264234	-0.0247502				-1.30394		-1.30394	-1.41296		none
YMR064W	-0.137697		-1.66108	0.191359	-0.11583	0.0199569	-1.11312	-0.607629	-1.14185	-0.429874	-0.785864			none
YMR069W	-1.09448		-2.86808	-0.104013	-0.190919	0.013087	-2.21075	-2.256	-1.54844	-1.6326	-1.59052	-1.93668		none
YMR075C-A	0.0335843		-2.21981	0.0166827	-0.0299064		-2.02244	-1.57679	-1.75474	-0.834652	-1.2947	-2.05473		none
YMR076C		-0.16789		-0.00399781	-0.234128	0.131369	-2.61537	-1.30115	-1.76839		-1.76839	-2.76669		none
YMR082C	-0.181195			0.0256261	0.0823443	0.103095	-1.39058	-0.44439	-1.07558		-1.07558	-1.14788		none
YMR084W														none
YMR085W	-0.211129		-0.566923	-0.0835188	0.430828	0.00476318	-1.37929	-0.30444	-0.74654	-0.278806	-0.512673			none
YMR086C-A	-0.453241		-2.53242	0.116215	0.185564	0.188488	-1.50561		-0.92691	-0.6247	-0.775805	-1.60264		none
YMR096W	-0.157643		-1.37422	-0.052636	0.306075	0.181689		0.507368	0.142345	1.26491	0.703629			none
YMR101C				0.0736893	0.104598		-1.53873	-1.06066	-1.06262		-1.06262	-1.35106		none
YMR103C	-1.40469		-2.6058	0.0495682	0.252419	0.112525	-0.846362	-0.923031	-0.752212	-0.498215	-0.625213	-0.693472		none
YMR104C	-1.89757		-3.031	0.0501821	0.334737	-0.029905	-0.884224	-1.25505	-0.916288	-0.357537	-0.636913	-0.707478		none
YMR116C		-0.45229	-3.44892		-0.0817052	0.0266086	-3.3286	-2.60361	-2.87164		-2.87164	-2.89757		none
YMR119W	-0.454981		-2.41322	-0.00238444	0.17352	0.0721394	-1.68618	-0.846085	-1.10748	-0.64258	-0.875032	-1.87144		none
YMR122C	0.191377		-0.902362	-0.037306	-0.0271269	0.069348	-0.959214	-0.791376	-0.798834		-0.798834	-0.554071		none
YMR133W	-0.57972		-2.96168	-0.0298685	-0.0404354	0.0642068	-2.47888		-1.50728	-1.15039	-1.32884	-2.87597		none
YMR135W-A	0.147459		-1.69046	-0.0708742	0.049606		-1.14591	-0.60763	-0.83947	-0.296935	-0.568202			none
YMR141C	0.6998		-0.266943	0.064082	0.136857	-0.0794687	-1.17572	0.0113717	-0.78853	0.12597	-0.33128	-1.16151		none
YMR142C	-0.789191	-0.36662	-2.91414	0.00714291	-0.00526182	0.164192	-2.80279	-1.8803	-1.98157	-1.84203	-1.9118	-2.48		none
YMR143W	-0.846924	-0.46831	-3.17506	0.0395587	-0.0599342	0.147838	-2.96523	-2.03367	-2.32261	-1.87324	-2.09793	-2.70634		none
YMR151W	-0.395754		-1.86376	-0.0181768	-0.0889541		-1.61707	-0.457586		-0.409039	-0.409039	-1.46942		none
YMR153C-A	-0.0274936		-1.50412	0.101853	-0.191407	-0.0698584	-1.42894	-0.81907	-1.29279	-0.650601	-0.971694	-1.63852		none
YMR154C	-0.229102		-1.72498	-0.0172815	0.0195603	0.0545371	-1.39652	-0.343249	-1.07174	-0.360044	-0.715893	-1.76396		none
YMR158W-A	0.304631		-1.28691	0.00788656	-0.00609832	-0.0370969	-1.21742	0.0657957	-0.556622	0.302105	-0.127259	-1.22973		none
YMR172C-A	0.244369		-1.92485	0.0398122	0.140416	-0.0154933	-1.78964	-0.851996	-1.28337	-0.507464	-0.895417	-1.93018		none
YMR173W	-0.397796	-0.93713	-1.93192	0.198898	0.033772	0.13371	0.058927		0.983716	1.33689	1.1603	-0.611001		none
YMR193C-A	-0.0205473		-0.319062	-0.0635571	-0.0853568	-0.138625	-1.72348	0.105708	-0.744978	-0.164686	-0.454832	-1.46151		none
YMR194W	-0.398612	-0.41557	-1.5075	0.0222232	-0.107336	0.0684437	-2.13505	-0.949251	-1.35682	-1.20483	-1.28082	-2.05569		none
YMR206W	-0.7494		-2.31205	-0.00459089	0.233528	0.173651	-1.42024	-0.914055	-1.2039	-1.25816	-1.23103	-1.66691		none
YMR215W	-1.01208	-0.279	-4.54112	0.0293661	-0.23693	-0.159277	-3.73385	-3.4895	-2.71667	-2.62462	-2.67064	-3.58448		none
YMR230W	-0.569961	-0.41202	-2.56107	0.114001	-0.266073	-0.0813146	-2.78408	-1.94585	-2.1493	-1.48612	-1.81771	-2.69297		none
YMR232W	-0.437482		-1.44787	-0.0214905	0.203973	0.0280336	-0.886233	-0.612768	-0.267298	-0.0956107	-0.181455	-1.51122		none
YMR242C	-0.580214	-0.70089			-0.18332	0.0880789			-2.21187		-2.21187			none
YMR244W	-0.194852		-1.93065		-0.272516	-0.0444322	-1.47145	-0.760462		-1.23013	-1.23013	-1.32922		none
YMR245W	-0.1731		-3.05626	0.0462842	-0.0137914	0.194384	-3.21522	-1.61724	-2.35547	-1.96112	-2.1583	-3.70082		none
YMR253C	0.081572		-1.13671	0.0151245	0.0144975	-0.0155241	-1.85389		-1.44291	-1.34565	-1.39428	-2.06148		none
YMR254C	-0.523222		-1.82246	-0.00211529	0.0369498	0.184576	-1.84645	-0.843073	-1.01477	-0.649252	-0.832011	-1.57219		none
YMR272C	-1.36803	-0.76385	-3.66681	0.0250958	-0.102674	-0.089734	-1.90468	-2.41212	-0.930292	-1.02016	-0.975224	-1.61327		none
YMR273C		-0.64841		-0.175134	0.0978676		-1.30327		-0.834054		-0.834054			none
YMR279C	-0.334886		-1.72013	0.0905647	-0.298807	-0.129173	-1.89203	-0.791141	-1.16237	-0.989209	-1.07579			none
YMR280C					0.190534		-1.56869							none
YMR290W-A	-0.0218145		-2.28201	0.0114524	0.150193	0.0738612	-1.75548	-0.806015	-1.09795	-0.89085	-0.9944	-1.75136		none
YMR294W-A	-0.408297		-2.9091	0.0814698	-0.0780799	0.0336535	-1.96236	-1.85756	-1.64604	-1.12636	-1.3862	-2.07494		none
YMR305C	-1.41022	-0.73926	-4.42208	0.0566977	-0.0635668	0.0390019	-1.57165	-1.7049		-0.150946	-0.150946	-1.44735		none
YMR306C-A	0.0070175		-1.34307	-0.0979077	-0.0277669	0.12209	-1.21982	-0.323345	-0.505819	-0.20891	-0.357365	-0.655057		none
YMR306W	-0.342241		-1.93551	-0.0973777	-0.044326	-0.00704771		-0.545807	-0.758651	-0.359151	-0.558901	-0.039125		none
YMR316C-A	-0.915703		-2.29635	-0.0474843	0.303514	0.1996	-0.882237	-1.15643	-0.131856	0.56365	0.215897			none
YMR316C-B	-0.345043		-2.91926	0.0354727	-0.0183756	0.0415049	-1.99361	-1.7188	-1.50876	-1.52652	-1.51764	-2.08009		none
YMR317W	-0.567609		-2.26169	0.0854274	-0.177841	-0.174914	-1.36221	-1.1295	-1.2368	-0.952526	-1.09466			none
YMR320W				0.0930061	-0.242605		-1.62879	-0.474607	-1.00886		-1.00886	-0.780196		none
YMR321C	-0.646741	-0.33205	-3.62625	0.150932	-0.152083	-0.0771199	-3.45729	-3.01074	-2.67572	-2.13909	-2.40741	-3.46521		none
YMR322C	-0.833087		-2.35591	-0.14583	-0.298258	0.1302	-1.09841		-1.55878	-1.33996	-1.44937			none
YMR323W	-0.8394		-2.84263	0.078316	-0.272986	-0.0109538	-0.753854		-0.402725	-0.354452	-0.378589	-1.15796		none
YMR324C	-0.786467		-2.34423	-0.0127495	-0.15261	-0.164793	-1.70616	-0.311842	-1.28123	-0.708902	-0.995064	-1.64921		none
YMR325W	-0.683839	-0.25269	-1.28638	0.0743019	0.0230516		-1.44978	-0.511872	-1.2113	-0.33319	-0.772246	-0.784001		none
YMR326C	-0.295469			-0.055929	0.030152		-1.69435	-0.633318	-1.12661	-0.864468	-0.995537			none
YNL012W	-1.78997		-2.88885	-0.107719	-0.16805	-0.106555	-2.35	-1.35304	-1.97034	-1.29504	-1.63269			none
YNL013C	-0.0143046		-2.51279	0.0023637	0.0388765	0.258194	-1.63045	-1.07115	-1.56107	-0.859216	-1.21014	-1.25472		none
YNL017C	0.277563		-0.603902	-0.109004	-0.211734	-0.0919076		0.330693	-0.680944	-0.337544	-0.509244	-0.73885		none
YNL018C	-0.96737			-0.0491948	-0.0954808	0.142466	-1.94998	-0.350244		-1.51643	-1.51643	-1.53364		none
YNL019C	-1.08149		-2.73634	0.109563	-0.0111024	0.140367	-2.10856	-1.76916	-1.39223	-1.33	-1.36112	-1.95717		none
YNL028W	0.0471622		-1.74871	0.147875	-0.167372	-0.0655464	-1.15364	-0.743322	-1.01439	-0.672235	-0.843312	-1.88634		none
YNL033W	-1.00352		-2.90438	0.061704	-0.0672882	0.00957202	-1.99419	-1.52081	-1.56069	-1.30823	-1.43446	-1.87387		none
YNL034W	-0.728401			0.0546321	-0.0142539		-1.67487	-0.557046	-0.992851	-1.06237	-1.02761	-1.74462		none
YNL040W	-2.38176	-0.93678	-4.53466	-0.180847	-0.158942	-0.17589	-5.13038		-2.62396	-1.77728	-2.20062	-4.88769		none
YNL043C	-0.761647		-2.99125	0.0390398	-0.0398959	0.0197336	-1.66308	-1.66289		-0.749453	-0.749453	-0.985041		none
YNL055C	-0.240281	-0.5453	-1.67858	0.178766	-0.0842067	0.0935676	-1.31947	0.337498	-0.353638	-0.0504821	-0.20206	-1.42289		none
YNL057W	-0.436782		-2.34381	0.183786	0.0232721	0.0732564	-1.74413	-1.76441	-1.18898		-1.18898	-1.40993		none
YNL067W		-0.1506	-2.12602			0.0186281		-1.52462						none
YNL069C	-0.834926	-0.54724	-2.97332	-0.470361	0.0768927	0.142353	-2.87285	-2.11377	-2.07841	-1.94779	-2.0131	-2.72786		none
YNL077W		-0.33305			-0.100909									none
YNL089C	-0.354529		-2.81874	-0.0700791	-0.156077	-0.128114	-2.64041	-2.00882	-1.96202	-1.71269	-1.83736	-3.07046		none
YNL093W	-1.08442		-2.04227	-0.122834	0.554663	0.177373	-1.58942	-1.40617	-1.22745	-0.612309	-0.919878			none
YNL096C	-1.01523	-0.79566	-3.06292		-0.104911	-0.0466549		-1.90946		-1.89774	-1.89774			none
YNL098C	-0.250771	-0.27782	-1.7734	-0.0816282	-0.0227639	0.0674859	-1.49093	-1.18018	-0.898156	-0.398183	-0.648169			none
YNL105W			-2.22111	0.0892889	0.179082	0.0514018	-1.41036	-0.306025	-0.949724	0.145664	-0.40203	-1.60851		none
YNL109W	0.0973132		-2.21715	0.01455	-0.222163	-0.0346719	-1.70571		-1.14168	-0.537546	-0.839614	-2.00811		none
YNL114C	0.459012	-0.53297	-1.01518	-0.0333902	0.0130564	0.168653	-1.46516	-0.452169	-1.12346	-0.247681	-0.685569			none
YNL117W	-0.746321		-1.77066	-0.147935	0.715092	0.0964657	-1.01323	0.218792	-0.552369	0.729757	0.0886937	-1.10203		none
YNL120C			-1.22701	-0.0395858	-0.108681	0.106458	-1.33352	-0.584991	-1.0729	-0.570542	-0.821722			none
YNL128W	-0.925165		-2.60048	-0.0441344	-0.101153	0.0352275	-2.16026	-1.37175	-1.79909	-1.46671	-1.6329	-1.80351		none
YNL139C	-0.15331	-0.58132	-1.92147	0.0370491	0.0552486	0.123394	-1.68962			-0.765451	-0.765451	-1.79709		none
YNL143C	0.305734		-1.90011	-0.186324	0.126878	0.140148	-1.25482	-0.426759	-0.537589	-0.771498	-0.654543	-0.950024		none
YNL145W	0.239466			-0.0129884	-0.0502794	0.311695	1.12606		-0.415305	-0.567449	-0.491377			none
YNL146W	-0.500052		-2.77139	0.00619967	-0.15405		-1.87974		-1.64422	-0.424144	-1.03418			none
YNL150W	0.282768	-0.099593	-2.79698	-0.0766892	-0.0948273	0.141832	-2.31405	-1.81797	-1.77823	-1.40072	-1.58947	-2.30331		none
YNL153C	-0.1591	-0.27607	-2.40374	-0.0797239	-0.238675	-0.0580726	-2.03639	-1.59706	-1.65747	-1.15969	-1.40858	-2.19911		none
YNL162W	-0.565016	-0.31988	-2.64826	0.114375	-0.133121	0.0495343	-2.74672	-1.62592	-1.90172	-1.40369	-1.6527	-2.5713		none
YNL170W	0.0273117		-2.13729	0.0585814	0.18746	-0.0192152	-1.94719	-1.20839	-1.55461	-0.855062	-1.20483	-1.81913		none
YNL171C	-0.0946404		-2.73704	0.0509475	-0.039754	-0.266613	-2.25789	-1.85611	-1.65633	-1.3105	-1.48342			none
YNL172W	-0.498915	-0.48154	-2.65352	0.0646656	-0.0404902	-0.138221	-1.81787	-0.784649	-1.23184	-0.629336	-0.930588	-2.13885		none
YNL174W	-0.196019	-0.22982	-2.45231	0.00726362	0.121237	0.0465688	-2.10813	-1.54966	-1.92113	-1.32615	-1.62364	-2.06487		none
YNL178W		-0.25181												none
YNL179C	-0.16628		-1.39155		-0.0858568	0.0361594	-0.91306	-0.558699	-0.724322	-0.589599	-0.656961	-0.287585		none
YNL180C	-0.0724597	-0.43778	-1.40198	0.191891	-0.0634986	-0.0248557	-0.688243	-1.06404	-0.933472	-0.717586	-0.825529	-0.351189		none
YNL184C	0.160377	-0.055828	-1.23077	0.0981914	-0.0897313	0.0405521	-1.15316	-0.608371	-1.09129	-0.240522	-0.665907			none
YNL196C	-0.606428		-1.2505	-0.0322319	0.232928		-2.06818			-1.56554	-1.56554	-2.12502		none
YNL198C	-0.305002		-2.00499	0.0139887	-0.0750688	-0.194653	-1.98086	-1.26477	-1.58834	-0.929826	-1.25908	-1.90023		none
YNL203C	-0.701385		-3.19249	-0.0281419	-0.069322		-1.58172	-1.86026	-1.58506	-1.73911	-1.66209	-1.97821		none
YNL204C	-0.913492		-2.96109	-0.0721401	-0.0192807	0.117805	-1.40666		-2.02817	-1.8548	-1.94148	-1.65791		none
YNL205C	-0.807185			-0.00206567	-0.0273109	0.0241596	-1.57085	-1.7918	-1.55848	-1.39921	-1.47885	-1.71623		none
YNL210W	-0.480062		-1.57446	0.178652	-0.0429679	-0.0124886	-2.13104	-0.941797	-1.47581	-1.15432	-1.31507	-1.81189		none
YNL217W	-1.20653	-1.4795	-3.31758	-0.0722465	-0.271359	-0.205608	-2.18808	-2.55054	-1.67744	-1.26556	-1.4715	-1.955		none
YNL226W	-0.32639		-2.45365	0.0510492	0.105096	0.178409	-1.8257	-1.41586	-1.43838	-0.868497	-1.15344	-2.02044		none
YNL228W	-0.0095854		-2.3783	-0.0281072	0.398013	0.301073	-1.92119	-1.15536	-1.38311	-0.738841	-1.06098	-1.97243		none
YNL235C	0.0495644		-1.6157	-0.00864372	0.00215264	0.00252886		-0.908521	-1.41092	-0.944049	-1.17748	-1.65983		none
YNL259C	-1.09085	-0.76909	-3.37234	0.0519933	-0.302989	-0.0118234	-1.81408	-2.17843	-2.19208	-1.89341	-2.04274	-2.08583		none
YNL266W	0.280434		-1.42433	-0.0477839	0.00861084	0.0625552	-1.43361	-0.555805	-1.11168	-0.518231	-0.814954	-1.29543		none
YNL269W	-0.588029		-2.43602	-0.0262266	-0.0214957	0.0567096	-1.88997		-1.36801	-1.24602	-1.30701	-1.77599		none
YNL276C	-0.445504		-1.2624	-0.0814904	-0.0261956	-0.0381494	-1.25613	-0.119839	-0.597253	-0.628977	-0.613115	-0.993503		none
YNL279W	-1.36131		-2.59786	-0.00245641	0.0519431	0.5909	-0.640659	-0.0344748	-0.087225		-0.087225	-0.30016		none
YNL285W	0.0149789		-1.23698	-0.0485475	-0.265426	-0.404979	-1.06816	-0.0266577	-0.772548	-0.768821	-0.770684			none
YNL296W	-0.232249		-1.41866	-0.0637881	-0.341882	-0.201779	-1.19591	-0.000519523	-0.756047	-0.235647	-0.495847			none
YNL301C		0.012389	-2.62896	0.0202626	-0.0460449	0.050174	-2.84061	-2.19321	-2.26291		-2.26291			none
YNL302C	-0.558981	-0.49235	-2.70746	0.0124066	-0.0796136	0.125406	-2.66292	-1.87773	-2.12548	-1.73062	-1.92805	-2.6425		none
YNL303W	-0.300549	-0.22355	-2.2914	0.119657	0.21956	-0.0082811	-2.42944	-1.52715	-1.69877	-0.58902	-1.14389			none
YNL318C	-0.419177		-1.57981	-0.257546	0.0212393	0.0492022	-1.53474		-1.15018	-0.461486	-0.805833	-1.30005		none
YNL319W	-0.45128		-1.84327	0.0764903	-0.00711	-0.132573	-1.61019	-0.912194	-1.1551	-0.439754	-0.797429	-1.5486		none
YNL320W	-0.0736871	-0.21358	-1.71642	-0.0365689	-0.238126	-0.0365162	-1.56133	-0.87607	-1.21877	-0.870973	-1.04487	-1.76943		none
YNL324W	-0.317464		-2.02816	-0.0178994	0.124922	-0.181004	-1.49342	-0.692978	-0.948398	-0.42027	-0.684334	-1.67319		none
YNL328C			-2.38524	-0.0834977	-0.175862		-1.05904		-1.34157	-0.997995	-1.16978			none
YNL332W	-0.864329		-2.46838	-0.22292	-0.0925968	0.067806	-1.88328	-1.83484		-1.90107	-1.90107	-1.17683		none
YNL333W	-1.78471	-1.01	-4.51314	-0.230053	-0.082575	0.123436	-3.12583	-2.88981	-2.46572	-2.37088	-2.4183			none
YNL334C	-1.41223		-4.48794	-0.0603303	-0.077266	0.103257	-3.13428	-2.34555	-2.28737	-1.47881	-1.88309	-2.92948		none
YNL335W	-1.31963		-3.239	-0.0690566	-0.118254	-0.0264754	-1.7812	-1.21027	-1.66073	-1.56422	-1.61247	-1.27528		none
YNL336W	-0.429036		-2.48812	0.283037	-0.235058	-0.0170128	-1.702	-1.47509	-1.5567	-1.32811	-1.4424	-1.27943		none
YNL337W	0.0845106	0.34375	-0.71027	0.0609701	-0.0591761	0.0888647	-1.97352	-0.770392	-1.51667		-1.51667			none
YNL338W	-0.296226		-1.59134	-0.0597543	0.10447	0.288274		-0.406876	-0.642116	-0.430181	-0.536148			none
YNL339C		-0.43729	-3.56564	0.0429924	0.211571	0.0622512	-2.69884	-2.48077	-1.85499	-1.74613	-1.80056	-2.76725		none
YNR005C	-0.274734		-1.63781	0.0206883	-0.0125262	-0.0956897	-1.14394	-0.748395	-1.02258	-0.455003	-0.738791			none
YNR016C	-0.999737	-0.48947	-4.10768	-0.0683779	0.0728773	-0.0196686	-3.92677	-2.74924	-2.91032	-2.38802	-2.64917	-4.24226		none
YNR025C	0.296431		-1.85663	-0.0632226	0.0177076	0.0486875	-1.6909	-0.569951	-1.27101	-0.490334	-0.88067	-1.58006		none
YNR026C	-0.187827	-0.33777		0.0956346	-0.167132	0.106322	-1.73118	-0.853815	-1.1892	-0.845964	-1.01758			none
YNR040W		0.14316			-0.480467									none
YNR042W	-0.289656		-1.70133	-0.0729072	-0.110383	-0.0574002	-1.63524	-0.788985		-0.952425	-0.952425			none
YNR057C	-0.608997	0.024112	-1.9425	-0.144096	-0.006049	0.187701	-1.71357	0.227149	-0.971878	-0.461894	-0.716886	-2.04544		none
YNR060W	-0.453051		-1.78028	0.00457494	-0.0335073	0.109319	-1.06529		-0.316211	0.19623	-0.0599903	-1.20278		none
YNR066C	-1.32353		-2.68425	-0.0958821	0.146181	0.080692	-0.393541	-0.571279	-0.76813	-0.378051	-0.573091	0.360622		none
YNR068C	-0.354244	-0.10279	-0.977888	-0.0201918	-0.172341	-0.235713	-1.67536	-1.37939	-1.69451	-1.44434	-1.56942	-1.16434		none
YNR069C	-0.342407		-1.11385	-0.147925	-0.140729	-0.134783	-2.31078	-1.4843	-1.88852	-1.65658	-1.77255	-1.82781		none
YNR072W	-1.10188		-3.40511	-0.0362436	0.156581	-0.0978208	-1.69717	-1.52006	-1.5874	-1.09237	-1.33988	-1.87885		none
YNR075W	-1.58912		-3.87351	-0.0652777	-0.136723	-0.124458	-2.31718	-2.30315	-1.85533	-1.95468	-1.90501	-2.20583		none
YNR076W	-1.06733	-0.90658	-1.9283	-0.120527	-0.0832983	0.148745	-1.82819		-1.805	-1.83384	-1.81942	-1.43157		none
YNR077C	0.361551			0.0450518	0.378831	0.170497	-1.82811		-1.48973		-1.48973	-1.08842		none
YOL005C		-0.14484				0.33402								none
YOL024W	-0.409198		-1.90745	-0.000319513	-0.118449	-0.158427	-1.73743	-0.648335		-0.571145	-0.571145			none
YOL028C	-0.198129		-1.43202	-0.0319891	-0.0721432	0.0489156	-1.86134	-0.330718	-1.36081	-0.75914	-1.05998	-1.96355		none
YOL029C	-0.181293	-0.48437	-1.4345	-0.0487529	-0.141984	-0.0133186	-1.96016	-0.772043	-1.49208	-0.838662	-1.16537	-1.98788		none
YOL035C	0.566801		-0.771458	-0.0235165	0.0731978	0.139032	-1.42151	-0.339906	-0.905317	-0.51535	-0.710333	-1.14899		none
YOL037C			-0.79187	-0.0144981	0.0586865	0.133114	-1.4881	-0.314765	-0.900863	-0.43459	-0.667727	-1.13052		none
YOL040C	-0.542512	-0.27911			-0.050339	-0.0469361								none
YOL046C	-0.370619		-2.48099	0.0750433	0.0409896	0.00822134	-2.45146	-1.28593	-1.79944	-1.26771	-1.53357			none
YOL047C			-2.34515	-0.093235	0.0741282	0.123473	-1.24453	-0.293084	-0.948795	-0.479735	-0.714265	-0.6501		none
YOL050C	-0.41786		-2.34811	-0.0754019	-0.0794633	-0.0369349	-1.95956	-1.18935	-1.49467	-1.22164	-1.35816			none
YOL053C-A	-0.335128		-1.20236	-0.148088	-0.387662	0.113178	1.75206	2.6324	1.46815	1.57063	1.51939			none
YOL067C	-0.0662147		-0.866977	-0.180238	-0.0325647	0.0615774	-1.00291	0.0351862	-0.570664	-0.372974	-0.471819	-1.11158		none
YOL079W	-0.201897		-2.30233		-0.276673	0.0134468	-2.0213	-1.28332	-1.60801	-0.93604	-1.27203	-2.02853		none
YOL085C	-1.04721			0.0250361	-0.21447		-0.849279	-0.285532	0.024546	0.219962	0.122254	-0.861776		none
YOL091W	-0.940536		-2.41861	-0.0601174	-0.0860643	0.673718	-1.67532	-1.07377	-1.29699	-0.863136	-1.08006	-1.76408		none
YOL098C	-0.209578	-0.50571	-1.8351	-0.00992867	-0.0706175	-0.0832877	-1.61315	-0.923378	-1.18153	-1.03647	-1.109	-1.94708		none
YOL099C	0.0743768		-1.72667	0.0290529	0.0288174	0.0592486	-1.34306	-0.579373	-1.12989	-0.813892	-0.971892	-1.49892		none
YOL104C	-1.32328		-2.99961	-0.161329	-0.187531	0.0268812	-2.25694	-2.18161		-0.52324	-0.52324			none
YOL106W	-0.469498		-1.75267	0.24521	-0.00348911	-0.242995	-1.25071	-0.637034	0.040524	0.781668	0.411096	-1.33238		none
YOL110W	-1.3824				8.668e-05	0.159282	-3.24864	-0.321831	0.135617	0.269936	0.202777	-1.24692		none
YOL118C	-0.320337		-1.39419	-0.0110805	0.0366394	0.111208	-1.05109	-0.782238	-0.779418	-0.463027	-0.621223	-0.382305		none
YOL120C	-0.342594	-0.32599	-2.46019	-0.00739719	-0.0581781	0.0415858	-2.9168	-1.87879				-2.66541		none
YOL121C	-0.60932	-0.49263	-2.79215	0.113616	-0.118485	0.0984343	-2.67526	-1.93142	-2.10546	-1.72306	-1.91426	-2.63533		none
YOL127W	-0.647784	-0.37276	-2.59526	0.0419432	-0.00297024	0.0656233	-2.6314	-1.77035	-1.97185	-1.56917	-1.77051	-2.53995		none
YOL131W	0.0478196			-0.151651	-0.0118881	-0.0366668	-1.53424	-0.188154	-0.785539	-0.625593	-0.705566	-1.3902		none
YOL132W	-0.523577			0.0675731	-0.0563637	0.302855	-2.43501	-1.60136	-1.45146	-1.2815	-1.36648	-2.40651		none
YOL134C	0.332126		-1.19342	-0.0951746	-0.0466785	0.197931	-1.12169	-0.137858	-0.730018	-0.418006	-0.574012	-1.41572		none
YOL150C	0.40519		-0.939581	-0.122833	-0.196796	0.0740647	-0.335449	1.0917	0.065699	0.223248	0.144474	-0.326762		none
YOL153C	-0.484958		-2.12143	0.0569126	0.110887	0.052079	-1.41078	-1.05538	-1.1878	-0.650813	-0.919305	-1.9155		none
YOL154W	-1.22188	-0.37125	-0.529336	-0.203371	-0.254278	-0.15789	-0.704079	-2.33338	-0.970926	-1.06492	-1.01792			none
YOL156W	-0.46873		-3.08959	-0.108798	-0.174594		-2.39645	-1.48787	-2.06075	-1.48462	-1.77269	-1.76322		none
YOL157C	-0.758395			-0.283909	0.109567	0.0203926		-1.80521	-2.08047	-2.29915	-2.18981	-1.88648		none
YOL160W			-3.53109	0.0474104	0.137834		-1.88256		-1.27453	-0.989136	-1.13183			none
YOL161C	-1.08495		-2.06114	0.0338167	-0.00678425	0.0977185	-2.00817	-1.53499	-1.56892	-1.77092	-1.66992			none
YOL162W	-0.845284		-2.08082	0.0100576	-0.103542		-1.49836	-1.09862	-1.1834	-0.782787	-0.983095			none
YOL163W	-0.834297		-2.26119	-0.00132776	-0.103471	0.0569842	-1.48413	-0.37608	-0.980214	-0.80731	-0.893762	-0.666683		none
YOL164W	-1.01617	0.24371	-2.63312	-0.141621	-0.244242		-2.00029	-1.68753	-1.76848	-1.03569	-1.40208	-1.84477		none
YOL165C			-2.25702	-0.252778	0.14463	0.218933	-2.16626	-1.32888	-1.68744	-1.55336	-1.6204	-2.0107		none
YOL166C	-0.460409		-2.07981	-0.114946	-0.0350852	-0.0436092	-1.41885	-0.245104	-0.800745	-0.132313	-0.466529	-1.54766		none
YOR009W	-1.59595		-3.21614	0.057954	0.0170933	0.133497	-2.24864		-1.12508	-1.45384	-1.28946	-2.30117		none
YOR012W	0.587491	0.0079591	-1.65165	-0.0474676	-0.215142		-1.65411	-1.01755	-1.20264	-0.898743	-1.05069			none
YOR013W	-0.332411		-2.29186	-0.146473	-0.146334	-0.0159399	-2.27177	-1.33646	-1.78329	-1.02507	-1.40418	-2.36153		none
YOR014W	-0.237936	-0.32108	-1.72176	0.0495918	0.153219	0.00260171	-1.53342	-0.787756	-1.07986	-0.631369	-0.855613	-1.91438		none
YOR015W		-0.5718	-1.71102	-0.160323	0.0504	0.0900847	-1.48975	-0.826348	-0.984439	-0.720095	-0.852267	-1.68448		none
YOR024W				-0.208651	0.175294		-0.736618							none
YOR028C	-1.36805	-0.68728	-3.31376	-0.0201536	0.0708435	-0.119644	-2.71482	-2.35773	-1.90289	-1.06377	-1.48333	-3.33874		none
YOR029W	-0.515874		-1.88873	0.0269912	-0.191456		-1.53415	-0.274368	-0.844546	-0.447858	-0.646202	-1.58534		none
YOR031W	-1.04685	0.14197	-1.43656	-0.0346313	-0.1481	0.327241	-0.6006	0.224296	0.104207	0.4793	0.291753	-0.545716		none
YOR035C	-0.320504		-1.60605	-0.0659387	0.187887	-0.0336749	-0.871682	-0.293534	-0.670889	0.107485	-0.281702	-0.899803		none
YOR041C	0.182385		-1.70978	-0.0438786	0.145658	-0.0309871	-0.972011	-0.289843	-0.789591	-0.44503	-0.61731	-1.50069		none
YOR050C	-0.391766		-1.8541	-0.120082	-0.0216067	0.389526	-2.04261	-1.17276	-1.08554	-0.882468	-0.984005			none
YOR053W	0.381461	-0.29873	-1.32787	-0.0909034	0.288466	-0.25277	-1.3142	-0.549692	-1.16513	0.144907	-0.510114	-1.40929		none
YOR055W	-0.112159		-2.39023	-0.024998	-0.0223126	-0.192718	-1.44363	-0.702838	-1.05166	-0.56136	-0.806512			none
YOR060C	-0.442952	-0.67452	-1.74096	0.0664012	-0.00343824	-0.0535411	-1.45925	-0.824509	-1.2808	-0.699065	-0.989935	-1.79552		none
YOR063W		-0.36727												none
YOR068C	-0.413749		-1.77382	0.0112244	-0.184336	0.0791628	-1.44251	-0.316173	-1.13548	-0.45692	-0.796202	-0.973623		none
YOR071C	-1.60819		-3.71389	0.0133971	-0.0762256	0.0522549	-2.16832	-2.09126	-1.78377	-2.05387	-1.91882	-2.27107		none
YOR072W	-1.19839		-2.36872	0.0494855	-0.0776454	-0.00484776	-2.15448		-1.55581	-1.38542	-1.47062	-1.78536		none
YOR081C	-0.974552		-3.70001	0.165518	-0.146348	-0.057473	-2.67522	-1.79403	-1.26269	-0.930116	-1.0964	-2.60684		none
YOR082C	0.0925827			-0.0970405	0.0221677	0.23809	-1.64711			-0.401689	-0.401689			none
YOR083W	-0.536662			-0.0475054	0.0842119	0.298525			-1.3755	-1.29133	-1.33341	-2.21513		none
YOR088W	-0.341393		-2.87307	-0.155918	-0.0518545	-0.036976	-1.92478	-1.21942	-1.51045	-1.03868	-1.27456	-2.09089		none
YOR095C	-1.30914	-0.90058	-4.19308	-0.147472	-0.0554031	0.153711	-3.37333	-2.57148	-2.53244	-2.01391	-2.27317	-3.4081		none
YOR096W	-1.10542	-0.46003	-3.49845	-0.0576558	-0.281038	-0.0656312	-3.09158	-2.46564	-2.41136	-2.24422	-2.32779	-2.85884		none
YOR099W	-1.07489	-0.29731	-3.64611	-0.0766951	-0.274849	-0.0565467	-3.08295	-2.67905	-2.22057	-1.83224	-2.0264	-3.16826		none
YOR100C	-0.58724			-0.0937786	0.435667	0.217302	-0.545105	-0.763468						none
YOR101W	-0.607793	-0.70626	-3.00884	0.0139829	0.0655792	0.183051	-2.33047		-2.40051	-1.67794	-2.03922	-2.67561		none
YOR102W	-0.420023		-2.61751	0.0427668	-0.122559	0.0871339	-1.95575	-1.14854	-1.46311	-0.763708	-1.11341	-2.05635		none
YOR105W	-0.0670406		-1.50666	-0.0240149	-0.0666215	0.183607	-1.70228	-0.350018	-1.29072	-0.395992	-0.843353	-1.50248		none
YOR121C	0.603553		-0.705439	0.0585263	-0.0148026	0.295134	0.349451	0.434518	0.635516	0.830014	0.732765	-0.97328		none
YOR122C	-0.0663445	-0.10122	-1.94747	0.0935479	-0.189679	0.0660954	-2.00606	-1.25153	-1.66044	-1.25861	-1.45952	-2.45244		none
YOR135C	0.332005		-1.02851	0.246331	-0.0904453	0.0263696	0.847163	1.37761	0.848928	1.38803	1.11848	0.770246		none
YOR139C	-0.182487		-1.26669	-0.0915103	0.018149	0.0839542	-1.30787	0.0310129	-0.746247	-0.212345	-0.479296			none
YOR140W														none
YOR146W	0.0792369			0.0884952	0.0251337	0.0718592	-1.77354	-1.19613	-1.47179	-0.613996	-1.04289	-1.79626		none
YOR167C	-0.624655	-0.10685	-3.38971	-0.103416	-0.173704	0.0216439	-3.35206	-2.57709	-2.83939	-2.30088	-2.57014			none
YOR169C	0.0483742	-0.19104		-0.0701237	-0.137154	-0.00272722	-1.97468	-0.974081	-1.66524	-1.0841	-1.37467	-1.92127		none
YOR170W	0.423755		-0.928085	0.145438	-0.00805515	-0.0696738	-1.41126	-0.487243	-1.14302	-0.336584	-0.739802	-1.62515		none
YOR171C	0.239568	0.24205	-1.08728	-0.0569093	-0.0624052	0.00249098	-1.6537	-0.55382	-1.23142	-0.562002	-0.896712	-1.72881		none
YOR177C				0.197487	-0.160245	0.348264	-1.62189	-1.04726	-1.27536	-0.697753	-0.986556	-1.22041		none
YOR178C	-1.21838		-3.04753	-0.0282837	0.4319	0.0184979	-1.07555	-1.04439	-1.4029	-1.0194	-1.21115	-1.25777		none
YOR179C	-1.17891	-0.28571	-4.56088	-0.0197859	-0.185579	-0.0177641	-2.68373	-2.61298	-2.22393	-1.77677	-2.00035	-2.44534		none
YOR182C	-0.0732228	-0.25904	-2.23461	0.146508	-0.0531571	0.173634	-2.4947	-1.46675	-1.92989	-1.30231	-1.6161	-1.90243		none
YOR183W	-0.777467		-1.25104	0.0653453	-0.0813061	0.0918514	-1.55287	-0.298341	-1.00613	-0.372576	-0.689351			none
YOR184W	-0.51055	-0.6379	-1.99746	-0.09962	-0.037639	-0.0871331	-1.40011	-0.545749	-0.661054	-0.117036	-0.389045			none
YOR186W	-0.393332		-1.69484		-0.212275	-0.182554	-1.40304	-0.122382	-0.761919	-0.40814	-0.58503	-1.50192		none
YOR190W	-0.928953			0.0119958	-0.127486	0.162861	-1.94664	-0.827328	-1.19182	-1.06898	-1.1304	-1.63085		none
YOR192C	-1.34905		-3.14905	0.121052	-0.138878	0.0795172	-1.88111	-1.4699	-1.41394	-1.56864	-1.49129	-1.85848		none
YOR199W	0.11799		-1.67884	0.0359134	-0.0743579	0.193589		-0.366801	-1.05279	-0.261368	-0.657081	-1.50023		none
YOR200W	-0.0436115		-1.79869	0.0216209	-0.134873	0.263406	-1.83234		-1.20043	-0.599169	-0.899799	-1.94821		none
YOR204W	-0.822561	-0.5609	-2.92993	-0.180196	-0.307037	-0.315273	-1.90847	-1.57872	-0.919976	-1.08218	-1.00108	-1.71894		none
YOR214C	-0.223895		-0.880026	-0.0623155	0.0256904	0.259629	-1.6375		-1.18457	-0.333763	-0.759164	-0.727725		none
YOR218C	-0.426105	-0.23664	-2.61459	0.0331458	-0.162513	-0.175442	-2.46201	-1.76231	-1.94483	-1.43397	-1.6894	-2.62619		none
YOR225W	0.130044		-1.66285	0.139972	0.0284183	0.159168	-0.30314	-0.0745976	-0.073642	0.168679	0.0475185	-0.77668		none
YOR234C	-0.679603	-0.42979	-2.85067	-0.0142504	-0.301112	0.00778159	-2.89514	-1.70871	-2.11753	-1.59919	-1.85836	-2.72149		none
YOR235W	-0.518954		-1.87536	0.0800267	-0.124872	-0.0978081	-1.54705	-0.320308	-0.91959	-0.296802	-0.608196	-1.45805		none
YOR237W	-1.52474		-3.34148	-0.105043	-0.00581157	0.098874	-2.12676	-1.44123		-1.33059	-1.33059	-1.99439		none
YOR240W	-0.261099	-0.50652	-2.25982	-0.0468987	0.363499	0.239326		-1.0857	-1.12747	-0.783964	-0.955716	-1.84064		none
YOR248W	-0.52746	0.2383	-2.96963	0.0837608	0.0505286	0.231005	-2.6253	-1.31193	-0.724963	-0.443277	-0.58412			none
YOR255W	-0.177958		-2.13296	-0.0853921	-0.0198648	-0.0141096	-2.10846	-1.01172	-1.3286	-0.90837	-1.11848	-2.14219		none
YOR263C	-0.545505		-2.72557	-0.0381286	0.213736	0.0818502	0.422999	-1.17368	-0.198192	0.0396223	-0.0792848			none
YOR268C	0.0781878			-0.107913	0.0426373	-0.14357	-1.62468	0.223568	-0.812552	-0.434834	-0.623693			none
YOR277C	-0.222739		-1.97973	0.0520857	-0.0319288	0.0644629	-2.09418	-1.2933	-1.61037	-0.993262	-1.30182	-2.19657		none
YOR282W	0.10764		-1.75555	0.162181	0.0673963	-0.0936648	-1.62628	-0.722152	-1.19623	-0.59553	-0.895879	-1.80888		none
YOR293W	-0.390839	-0.19274	-2.63665	0.15165	-0.213984	-0.0116528	-2.81078	-1.78975	-2.14374	-1.44754	-1.79564	-2.68893		none
YOR298W	-0.283843		-0.277181	0.0524971	-0.248907	-0.147089		0.000201826	-0.699638	-0.100416	-0.400027	-1.21172		none
YOR300W	-0.172852		-2.1451	0.0886365	0.118168	-0.161704	-1.53155		-1.12626	-0.668017	-0.89714			none
YOR303W		-0.65061	-1.35588	-0.0879313	-0.114952	0.159716		-0.162063		0.0324933	0.0324933	-0.014898		none
YOR310C	-0.267862	-0.37519	-2.05585	-0.162454	0.0989661	0.021501	-1.99136	-1.43372	-1.67088	-1.45904	-1.56496	-1.83924		none
YOR312C	-0.86753	-0.35704	-2.86182	0.20866	-0.124701	-0.0788088	-2.97868	-1.81864	-2.06625	-1.70207	-1.88416	-2.81951		none
YOR313C	0.372838	1.1298	-0.562343	-0.078296	-0.417714	0.195465	-1.97852	-1.18426				-1.44336		none
YOR314W	-0.2143				-0.168275	-0.0815422		-0.88282		-0.853551	-0.853551			none
YOR317W	-1.09754	0.079636	-2.48386	0.0454445	-0.342407		-1.59389	-1.98009	-1.43322	-1.6625	-1.54786	-1.84472		none
YOR318C	-0.0239649		-1.97522	-0.19467	0.0873531	0.0946036	-1.48497	-1.3501	-1.47497	-0.755647	-1.11531	-1.69328		none
YOR325W	-0.260532		-1.84784	-0.0884573	0.187496	0.281339	-1.70283	-0.654984		-0.368103	-0.368103			none
YOR331C	-0.250526		-2.07713	0.0775141	0.199854	0.0157742	-1.84968	-1.25206	-1.25673	-1.03977	-1.14825			none
YOR333C	-0.315237		-1.12895	0.155835	-0.229628	0.0525751	-1.41267	-0.728151	-0.886436	-0.499729	-0.693082	-1.23408		none
YOR339C	-1.23617		-2.89263	-0.105609	-0.261997	0.014283	-1.95661	-1.43067	-1.66701	-1.45616	-1.56158			none
YOR343C	-0.550268		-1.90598		0.0799354	0.319607		-0.39637	-0.696667	-0.286136	-0.491401			none
YOR345C	-0.369056		-2.6136	-0.0187484	-0.173904	-0.244254	-2.67106	-1.84667	-2.37091	-1.75799	-2.06445	-2.48953		none
YOR348C	-0.831052		-2.24147		0.445885	0.323991	0.720261	-0.354561	0.258191	1.21746	0.737825	-0.58978		none
YOR351C	-0.467805		-1.74316	-0.080641	-0.0787356	-0.109011	-1.49099		-0.797071	-0.55153	-0.6743	-1.63216		none
YOR356W	-1.07749	-0.62234	-2.70123	-0.00418176	-0.00226629	-0.0552198	-2.16806	-1.17846	-1.68594	-1.06717	-1.37655	-2.49276		none
YOR363C	-0.284345	-0.30745	-1.74645	-0.0383495	0.0212794	-0.00317863	-1.56568	-0.623622	-1.01417		-1.01417	-1.78816		none
YOR364W			-2.01902		-0.0286348	0.0685662	-1.70042	-0.650224	-1.21255	-0.830497	-1.02153	-1.72381		none
YOR365C	0.0235811			-0.0817196	0.109078	-0.143898	-1.88202		-1.35537	-1.02451	-1.18994			none
YOR366W	-0.112066		-1.37238	-0.104392	-0.165438	0.035369	-1.68789	-0.359788		-1.12382	-1.12382	-1.70177		none
YOR369C		-0.21823												none
YOR373W	-0.70363		-2.28929	0.0193517	-0.228526	0.0944933	-1.90053	-1.39846		-0.827506	-0.827506	-1.8878		none
YOR376W	-0.663581			0.0924172	-0.0854344			-0.654271	-1.25584	-0.908965	-1.0824	-1.35025		none
YOR377W	-0.731953	-0.11227	-2.2449	-0.00316676	0.0547508	-0.108752	-1.95936	-0.87847	-1.47778	-0.782994	-1.13039	-2.15773		none
YOR379C	-0.562371		-2.58256	0.0378163	0.0327402	0.0741346	-1.95667	-1.18174	-1.38947	-0.921697	-1.15559	-2.28862		none
YOR387C	-0.318062		-1.54789	-0.0924919	-0.364306	-0.0710722	-1.11222	-0.986814	-1.03978	-1.47716	-1.25847			none
YOR388C	-0.358896		-0.76104	-0.0382875	-0.0806542	0.0363122	-1.51862	-0.394398	-1.04507	-1.3197	-1.18239	-1.29927		none
YOR389W	-0.564884	-0.60814	-2.27743	-0.0834599	-0.0732211	-0.0336771	-1.28715	-0.66073	-1.40455	-0.888417	-1.14649	-0.599187		none
YOR390W	-0.946448	-0.37493	-2.5791		-0.0978655	-0.0375295		-1.88387		-1.68281	-1.68281	-2.26355		none
YOR391C			-2.49804	-0.150685	-0.203649	0.0882535	-1.31245		-1.56872	-1.06381	-1.31627	-0.455843		none
YOR392W	-0.375698			0.0908459	-0.069339	0.0307339	-1.33277	-0.559094	-1.08202		-1.08202	-1.25486		none
YOR393W	-0.875062		-2.6662	-0.0851025	-0.187002		-0.870057	0.553869	-0.346693	-0.485616	-0.416154	-1.36554		none
YOR394W	-0.70849	-0.36107		0.0996333	0.0148975	0.131327	-1.48014	-0.61457	-0.955127	-0.887154	-0.921141			none
YPL006W		-0.28146			-0.0533924									none
YPL021W	-0.518872		-1.90753	0.0104766	-0.0157298	-0.229463	-1.32634	-0.25702	-1.00306	-0.355352	-0.679206	-1.53063		none
YPL025C	-0.195303		-0.533688	-0.0125907	0.0652407	0.109522	-0.43673	-0.329104	-0.43605	-0.0682077	-0.252129			none
YPL027W	-0.778222		-2.52055	-0.185797	-0.26667	0.10482	-1.85414	-0.692259	-1.58454	-0.79432	-1.18943			none
YPL033C				0.0784797	-0.133711	0.314534		-0.823656		-0.833245	-0.833245	-1.43139		none
YPL035C	0.511882			-0.0225139	-0.178674	0.0976626	-1.96935	-0.628454	-1.18341	-0.379338	-0.781372	-1.92032		none
YPL036W	-1.16745		-2.62802	0.21853	-0.29423	-0.0991942	-1.48291	-0.26189	-0.632386	-0.746993	-0.68969	-1.87036		none
YPL039W	-0.322126	-0.19235	-2.44894	0.0073845	-0.220612	-0.0411495	-1.57562	-1.01805	-1.20651	-0.593772	-0.900143	-1.83199		none
YPL044C	-0.350232		-2.11237	0.00837143	-0.104502	-0.0128821	-1.85148	-1.46506		-1.13278	-1.13278	-2.01463		none
YPL056C	-0.678422	0.035893	-1.91638	0.167376	0.188766	0.0562816	-0.589353	-0.638141	-0.155651	0.312244	0.0782967	-0.767426		none
YPL062W	0.140897			-0.0116277	-0.159765		-1.17646	0.121207	-0.499444		-0.499444	-1.01088		none
YPL073C			-1.54283	-0.0387936		0.0958381	-1.55764	-0.698103		-0.615761	-0.615761	-1.36352		none
YPL079W	-0.552934	-0.31825	-2.51213	0.0742796	-0.116673	0.0516039	-2.81704	-1.70217	-2.03763	-1.60957	-1.8236	-2.695		none
YPL080C	0.262409		-0.694888	0.0128604	0.0841136	0.192273	-1.77994	-0.0301123	-1.14189	-0.28123	-0.71156			none
YPL081W	-0.217915	-0.29016	-1.71875	0.137826	-0.0821109	0.15344	-2.48223	-1.29568	-1.84227	-1.48364	-1.66295			none
YPL088W														none
YPL090C	-0.773424	-0.34616	-3.25051	-0.00638469	-0.191226	-0.207846	-2.93495	-2.2093	-2.13408	-1.7399	-1.93699			none
YPL101W		-0.09224												none
YPL102C	-0.233633		-1.97221	-0.094775	-0.0576604	0.0429029	-1.84581	-1.02974	-1.38737		-1.38737	-1.79613		none
YPL107W	0.61271	-0.077886	-0.929737	0.0288729	0.173385	0.185943	-0.937884	-0.0745829	-0.765305	-0.0799031	-0.422604	-1.41608		none
YPL109C					-0.0230056									none
YPL113C														none
YPL114W	-0.57687		-1.49123	0.147789	-0.213744	0.219646	-1.75306	0.0315755	-1.3591	-1.02432	-1.19171	-1.66839		none
YPL115C														none
YPL121C	-0.530333		-1.8268	0.0500249	0.00541787	-0.047276	-1.43228	-0.086692	-0.856554	-0.406831	-0.631693	-0.712402		none
YPL127C	-1.20698	-0.44244	-4.27657	-0.0116075	-0.000249136	0.133334	-3.04754	-2.88908	-1.54534	-1.04853	-1.29694	-3.15229		none
YPL130W	-0.396416		-2.10187	-0.172449	-0.100594	-0.101736	-1.56687	-0.337357	-1.01577	-1.1077	-1.06174	-1.36089		none
YPL131W	-0.47399	-0.28208			0.157682	0.0206635		-1.8469						none
YPL136W	0.0309442		-0.789644	-0.018133	-0.161705	-0.0279298	-1.08183	-0.458818	0.044963	0.0657135	0.0553382	-1.56174		none
YPL142C		-0.76424												none
YPL143W	-0.779702	-0.37242	-2.90062	0.153721	-0.1986	0.15924	-2.92666	-1.87626	-2.13141	-1.65133	-1.89137	-2.80283		none
YPL152W	0.402101		-1.08609	0.0277805	-0.069959	0.0512078	-0.963298	-0.116077	-0.446854	0.183038	-0.131908	-1.40783		none
YPL164C	0.0265893		-1.96825	-0.2017	0.123922	0.156883	-2.46632	-1.09222	-1.66887	-0.904006	-1.28644	-2.84224		none
YPL182C			-2.47275	0.0460223	-0.0909991	-0.182405	-2.01371	-1.56383	-1.68377	-0.880458	-1.28212	-2.03834		none
YPL185W	0.24141		-1.5386	0.0470086	0.0577053	-0.0519822	-0.288239		0.633036	0.534379	0.583708	-0.639193		none
YPL187W		-0.71901			0.0314688				-1.90574		-1.90574			none
YPL191C	-0.154474		-1.79627	0.0301716	-0.0691384	-0.281942	-1.59525	-0.854183	-1.19796	-0.437099	-0.81753	-1.95266		none
YPL192C	-0.33856		-2.38512	0.0635401	0.0943519	0.220753	-1.75767		-0.924756	-1.0568	-0.990777	-1.65981		none
YPL197C	-0.507763		-2.09032	-0.0886421	0.0484687		-2.58268	-1.57792	-1.93599	-1.8248	-1.88039	-2.27137		none
YPL198W	-0.382637	0.060853	-1.64232	0.050533	-0.105716	0.038826	-2.30254	-1.08081	-1.75525	-1.37316	-1.5642	-1.90734		none
YPL200W	0.0414029			-0.143327	0.383134		-1.39432		-0.964293		-0.964293			none
YPL201C	-0.377159		-1.25609	-0.0443269	0.0344966	0.280174				-0.0533782	-0.0533782			none
YPL205C	0.212596		-1.77266	0.0963255	0.143599	0.0008846	-1.60019	-0.628787	-1.11794		-1.11794			none
YPL220W	-0.564993	-0.33343			-0.119196		-2.73773	-2.30672						none
YPL238C	-0.0749057		-1.92048	0.112524	0.0752796	-0.0734356	-1.95999	-0.997981	-1.37171	-0.970437	-1.17107	-2.08263		none
YPL251W	-0.0430339		-1.87514	0.420996	-0.132764	0.267682	-2.65199	-0.530281		-0.643037	-0.643037	-2.28104		none
YPL258C	-0.959529		-3.05245	0.00804986	-0.196336	0.104829		-1.33638	-1.16767	-1.28429	-1.22598	-2.35732		none
YPL261C	0.169515	-0.67201		0.0300649	0.0242275	-0.0360807	-1.0328	0.139518		-0.0210544	-0.0210544	-1.21437		none
YPL275W	-0.438784	-0.046544	-1.05531	0.0203378	-0.0646983		-1.49037	-0.618649	-0.871109	-1.24196	-1.05654	-1.43142		none
YPL276W	-0.44174		-0.877344	-0.0461715	-0.0426209	-0.0984301	-1.65962	-0.985617	-1.02447	-1.14923	-1.08685	-1.4862		none
YPL277C	-0.423253		-2.17089	0.0769472	-0.0477295	0.0552465	-0.9257	-0.52486		-0.871424	-0.871424	-0.371324		none
YPL278C	-0.488913		-2.09179	-0.0642819	-0.107669	-0.0192423	-1.32394	-0.766797	-1.23763	-0.785214	-1.01142			none
YPL279C	-0.863185	-0.81404	-2.29061	0.0745014	-0.250188	-0.0349536	-2.36526	-1.91274	-1.91011	-1.79082	-1.85046			none
YPL280W	-0.650937		-2.29896	-0.0864566	-0.152389		-1.24764	-0.813361	-1.3648	-1.07958	-1.22219	-0.70475		none
YPL281C	-0.859642		-2.77077	-0.0630624	-0.253555	-0.0379991	-0.693111	0.390205	-0.292268	-0.597189	-0.444729	-0.465034		none
YPL282C	-0.779771	-0.60085	-1.42418	0.00246899	-0.0440269	0.0225018	-1.44864	-0.845943	-1.14559	-1.00809	-1.07684	-1.10661		none
YPL283C	-0.481314	-0.35378			0.119587									none
YPR012W	-0.314564		-1.50428	0.14668	0.0193208		-1.31807	-0.274672	-1.10638	-0.511972	-0.809177			none
YPR014C	-0.76575		-3.17151	-0.158416	-0.233349	-0.0296037	-2.19843	-1.59483	-1.8849	-1.50134	-1.69312			none
YPR027C	-0.447071		-2.76903	-0.00871591	0.148735	0.0947309	-2.15729	-1.1408	-1.76998	-0.62219	-1.19609	-1.8537		none
YPR031W	-0.455314			0.16564	-0.262728	0.45207	-1.79821		-1.42102	-1.05118	-1.2361	-1.81384		none
YPR038W	-0.21881		-2.64752	0.0160012	0.0322383	0.147643	-2.25487	-1.40935	-1.66925	-1.41628	-1.54276	-2.98447		none
YPR040W	0.306836	0.67979	-0.960363	0.00723541	0.0362473	0.0619506		-0.454274	-0.99819	-0.353337	-0.675764	-1.65647		none
YPR043W	-0.669343	-0.37511	-2.60144	0.073012	-0.0849385	-0.0423412	-2.8378	-1.73638	-1.89736	-1.56259	-1.72997	-2.59222		none
YPR044C	-0.544274	-0.52827			-0.0965711		-2.76243		-2.02916		-2.02916	-2.58643		none
YPR050C	0.134676		-2.14506	-0.0593851	-0.158611	0.00168637	-2.02084	-1.63659	-1.98172	-1.52783	-1.75477	-2.54998		none
YPR052C	-0.491552	-0.045382	-2.89345	-0.0624012	-0.105791	-0.0167586	-2.07813	-2.07885	-2.0785	-1.62895	-1.85372	-2.33154		none
YPR053C	-0.489198	-0.0064031	-2.68339	0.0133585	-0.0458064	-0.033347	-2.06045	-1.75442	-1.96713	-1.56809	-1.76761	-2.0266		none
YPR054W			-2.34091	0.051765	-0.0599963	-0.0563011	-1.81059	-1.07096	-1.3108	-1.0595	-1.18515			none
YPR059C	-0.514647		-3.43605	0.0574039	0.0725405	0.0501459	-2.52377		-1.80796	-0.999685	-1.40382	-2.69542		none
YPR060C	-0.363064	-0.34495	-2.58464	0.0506728	-0.515997	-0.183047	-3.02176	-1.92558	-2.11207	-1.58873	-1.8504	-2.35821		none
YPR064W	-0.57741		-0.172743	-0.0365723	0.122479	0.103086	-1.28962	0.431836		-0.172411	-0.172411			none
YPR076W	-0.374173		-1.9517	0.00181879	-0.0080967	0.0907069	-1.91121	-0.94593	-1.04916	-0.758597	-0.903881	-1.88597		none
YPR077C	-0.591666		-1.77175	-0.0216424	-0.101236	-0.074935	-1.72493	-0.548101	-0.651208	-0.218998	-0.435103	-1.47203		none
YPR078C	-0.249499		-1.25926	0.0843912	-0.0723905	0.0231425	-1.49242	-0.52976	-0.667779	-0.427033	-0.547406	-0.553902		none
YPR087W	-0.240151		-1.98492	-0.21098	0.0687626	0.208839	-1.97199	-1.38473	-1.19613	-1.15846	-1.17729	-2.06136		none
YPR090W	-0.0211274		-1.0503		0.0781472	0.0242734	-1.41799	-0.403394	-0.957676	-0.314122	-0.635899			none
YPR092W	0.699204		-0.003049	0.0678892	-0.106157	0.114061	-1.31099		-1.07903		-1.07903	-0.827348		none
YPR096C	-0.338281		-1.93436	-0.130073	-0.0345297	0.0524884	-1.69068	-0.0236615	-1.04095	-0.519749	-0.78035	-1.11542		none
YPR099C	0.400934		-1.61913	0.00499317	0.143232	0.0464914	-0.848059	-0.489179	-0.828653	-0.225286	-0.526969	-1.53965		none
YPR102C		-0.23378												none
YPR106W			-2.0667	-0.0258106	-0.0796316		-0.030222	-0.488152		-0.433097	-0.433097			none
YPR107C														none
YPR115W		-0.1589										-1.79301		none
YPR117W	-0.501865		-2.67156	-0.062654	-0.0373436	-0.0317793	-2.4123	-1.44538	-1.47486	-1.38491	-1.42988	-2.51396		none
YPR121W	-0.722064		-2.3213	-0.187439	-0.0913388	0.050264	-2.30963	-1.10024		-1.41048	-1.41048	-2.08563		none
YPR123C														none
YPR125W		-0.42884												none
YPR126C	-0.112894		-1.85737	-0.0417617	-0.181428	0.061803	-1.87172	-0.755624	-1.12071	-0.67022	-0.895463	-1.96075		none
YPR127W		-0.24725		-0.294319	-0.101807		-1.16706	-1.31179		-0.581059	-0.581059			none
YPR130C			-1.93546		0.00473602		-1.41813	-0.594999	-1.02815	-0.7182	-0.873176	-1.48565		none
YPR131C	0.126526		-0.990621	-0.0848796	-0.163752	0.0407382	-1.50492	-0.52694	-1.05834	-0.33499	-0.696666	-1.48216		none
YPR135W		-0.31944												none
YPR136C	0.202177		-0.954666	-0.0698844	-0.0327621	0.131809		-0.668857	-0.852963	-0.509253	-0.681108	-1.39706		none
YPR142C	0.550202		-1.16148	0.0700704	0.10283	0.0788093	-1.47591	-0.283508	-1.10812	-0.201872	-0.654996	-1.49708		none
YPR147C	-0.436661	-0.13764	-2.37977	0.0131103	-0.197084	-0.200852	-2.16075	-0.753795	-1.41167	-0.735889	-1.07378	-2.4843		none
YPR150W	0.893141		-0.630028	-0.00631988	0.021247	-0.0171263	-1.43249	-0.43154	-0.686585	-0.335398	-0.510991			none
YPR160W	-0.93412		-1.81875	0.13687	0.260422	-0.251893	1.15821	2.68585	0.871817	1.18521	1.02852	0.485848		none
YPR170C	-0.557487		-2.79305	0.0732589	-0.117049	0.105283	-2.3069	-1.90272	-1.70169	-1.50197	-1.60183	-2.10044		none
YPR177C	0.366159		-1.15563	0.078177	0.158221	-0.0334192	-0.970673	-0.278554	-0.806254	-0.206098	-0.506176	-1.3085		none
YPR181C		-0.16968		-0.0650188		0.0755652		-1.45092						none
YPR183W	-1.02363		-3.73446	-0.0723081	0.081192	0.252296	-2.64571	-2.35595	-2.13599	-2.08263	-2.10931	-2.39385		none
YPR193C	-0.983761		-2.54958	-0.0483533	0.0201908	0.359339	-1.4783	-0.238704	-1.05861	-0.311	-0.684806	-1.69448		none
YPR195C			-2.37256	0.0698497	-0.149528	0.192788	-0.10387		-0.647228	-0.345859	-0.496544	-0.497632		none
YPR196W	-0.432766		-2.59986	-0.105021	-0.112261	-0.0613082	-2.26695	-1.63988	-1.82436	-1.43245	-1.6284	-2.11769		none
YPR197C	-0.45923		-2.63728	0.171106	-0.0597458	0.0213565	-1.69492	-1.08163	-1.20453	-0.865672	-1.0351			none
YPR202W	-0.602875		-2.95166	-0.0400384	0.0130415	-0.0210876	-2.3079	-2.40493	-1.77847	-1.70982	-1.74415	-2.30134		none
YPR203W	-0.694445		-2.94628	-0.192573	-0.0553757	-0.124835	-2.46981	-2.33006	-1.87194	-1.59215	-1.73204	-2.31318		none
YPR204W	-0.46511	-0.30013			0.0525478	-0.0177334								none
YER103W	1.15835		0.505232	0.0926129	-0.645234	-0.486825	0.395052	0.991438	0.660205	0.446076	0.55314	-0.363084	15.0687	SAGA-dominated gene; TFIIH binding increased upon 3' heat shock
YPL250C	-0.864553	0.27362	-2.37664	0.131937	-0.39227	-0.0370731	-0.582623	0.213099	-0.142011	0.408732	0.13336	0.126307	14.7353	SAGA-dominated gene; TFIIH binding increased upon 3' heat shock
YMR251W-A	-0.748449		-1.18787	0.215627	-0.111902								14.4197	SAGA-dominated gene; TFIIH binding increased upon 3' heat shock
YBR072W	1.56407				-0.19778	0.139291		2.68731		1.36087	1.36087	-0.935868	14.1615	SAGA-dominated gene; TFIIH binding increased upon 3' heat shock
YLR109W		-0.30275	-1.37096		-0.330037	-0.0366007							13.9172	SAGA-dominated gene; TFIIH binding increased upon 3' heat shock
YDR171W	0.581835	0.59836	-0.310282		-0.588479	-0.503047		0.455224	0.054528	0.23143	0.142979	-0.232739	13.8229	SAGA-dominated gene; TFIIH binding increased upon 3' heat shock
YKL035W	0.0061696	0.26045	0.041072	0.0650027	-0.00647432	-0.127306	-0.439911	1.34406	-0.310104	-0.196689	-0.253396	-1.2895	13.7159	SAGA-dominated gene; TFIIH binding increased upon 3' heat shock
YDR011W	-1.01509	-0.66539	-3.13069	0.228334	-0.0221351	-0.0518884	-0.874083	-0.921404	-0.186383	-0.189365	-0.187874	-0.89042	13.674	SAGA-dominated gene; TFIIH binding increased upon 3' heat shock
YPL240C		0.60045										-1.11681	13.6722	SAGA-dominated gene; TFIIH binding increased upon 3' heat shock
YPL265W	0.573311	0.24095	-0.25098	0.0496573	-0.000286052	-0.169317	0.554557	0.506058	0.38854	0.577746	0.483143	0.475614	13.6392	SAGA-dominated gene; TFIIH binding increased upon 3' heat shock
YML100W-A	-0.211587		-2.44688	0.113007	0.0028165	0.131006	-1.95156	-1.35023	-1.58549	-1.38599	-1.48574	-1.79159	13.5083	SAGA-dominated gene; TFIIH binding increased upon 3' heat shock
YML100W	-0.820917	0.037484	-0.856415	-0.0939839	-0.1694	-0.432676	1.35963		1.18829	1.03287	1.11058	0.422551	13.4836	SAGA-dominated gene; TFIIH binding increased upon 3' heat shock
YGR250C	-1.66057			0.245265	-0.357316	-0.236	-0.901503	-0.944365	-0.28568	-0.031691	-0.158685	-1.3567	13.2589	SAGA-dominated gene; TFIIH binding increased upon 3' heat shock
YLR327C	-0.0650484		-2.50507	0.0311597	0.472629	0.203455		-0.285498	-0.284484	1.13288	0.424199		13.1575	SAGA-dominated gene; TFIIH binding increased upon 3' heat shock
YMR195W	-1.51161	-0.64365	-3.98009	0.171321	-0.0290342	0.0682802	-0.458429	-1.3251	-0.456127	0.422048	-0.0170393	-0.600714	13.1051	SAGA-dominated gene; TFIIH binding increased upon 3' heat shock
YMR291W	-0.805864		-3.6542	0.0269979	0.424887	0.181109	-0.032828	-2.10875	-0.38945	0.344079	-0.0226857	-0.255492	12.9105	SAGA-dominated gene; TFIIH binding increased upon 3' heat shock
YBR126C	-0.0561051	0.28893	-1.48449		-0.0366353	-0.241151				0.329435	0.329435	-0.423936	12.8884	SAGA-dominated gene; TFIIH binding increased upon 3' heat shock
YHR087W	0.222087		-0.334924	0.0307306	0.0495787	-0.0675932	0.137011	0.661523	0.115513	0.0955196	0.105516		12.7867	SAGA-dominated gene; TFIIH binding increased upon 3' heat shock
YNL134C	0.0493031	0.32773	-1.6296	-0.0677667	-0.115421	0.116582	-0.640516	-0.571318	-0.226638	-0.344093	-0.285365	-0.874972	12.7691	SAGA-dominated gene; TFIIH binding increased upon 3' heat shock
YBR083W	-0.542001	-0.46553	-2.65141	0.295386	0.423588	0.225525	-1.0007	-1.02419	-0.368946	-0.0624853	-0.215716	-1.28934	12.7406	SAGA-dominated gene; TFIIH binding increased upon 3' heat shock
YLR258W	-0.0368261	-1.0221	-0.759523	-0.0372776	0.465984	-0.0628541	1.12068	1.6195	0.264375	0.458825	0.3616	1.44376	12.6053	SAGA-dominated gene; TFIIH binding increased upon 3' heat shock
YGL062W	0.323701	0.026985	-1.52685	-0.00202038	0.11597	-0.140354	0.735709	0.581599	0.333497	0.525695	0.429596	0.757251	12.5113	SAGA-dominated gene; TFIIH binding increased upon 3' heat shock
YDL124W	-1.01577	-0.99364	-2.49026	0.155891	-0.205899	-0.209528	-0.293955			0.559604	0.559604	-0.902874	12.49	SAGA-dominated gene; TFIIH binding increased upon 3' heat shock
YER150W	-0.869366		-1.95457	0.175363	-0.0621638	0.0275201	0.032524	-0.651876	0.396033	0.567255	0.481644	-1.30741	12.4318	SAGA-dominated gene; TFIIH binding increased upon 3' heat shock
YGL037C	0.228223	0.064444	-1.28475	0.109945	-0.25761	-0.304915	-0.064093			0.536576	0.536576	-0.293674	12.3964	SAGA-dominated gene; TFIIH binding increased upon 3' heat shock
YPL014W	-1.97257		-3.63446	0.310474	-0.82257	-0.241918	-0.754969	-0.417814	-0.223047	-0.435693	-0.32937	-0.846232	12.3618	SAGA-dominated gene; TFIIH binding increased upon 3' heat shock
YOR230W	-0.553789	-0.77617	-1.64936	0.106468	-0.0985396	-0.0178501	-0.367009	-0.317195	-0.268453	-0.561489	-0.414971	0.05076	12.3172	SAGA-dominated gene; TFIIH binding increased upon 3' heat shock
YLL028W	-0.516751	-1.0355	-2.34194	0.250065	-0.207152	-0.0733956	-0.227634	0.237564	-0.089372	-0.172062	-0.130717		12.2633	SAGA-dominated gene; TFIIH binding increased upon 3' heat shock
YLL027W	-0.348761	-0.38037	-2.47737	0.197135	-0.0161279	0.186965	0.113883	-0.401455	0.491656	1.27712	0.884388		12.2355	SAGA-dominated gene; TFIIH binding increased upon 3' heat shock
YOR374W	-1.74625	-0.29284	-3.02675	-0.201873	0.497785	0.117456		0.857545				0.006263	12.1803	SAGA-dominated gene; TFIIH binding increased upon 3' heat shock
YOR136W	0.294724	-0.28388	-0.939759	0.0970955	-0.117979	0.0537823		1.18112					12.1163	SAGA-dominated gene; TFIIH binding increased upon 3' heat shock
YPL057C	-1.45603	-0.85518	-4.61686	0.0569756	0.204818	0.0884577	-0.2155	-2.47475	-0.195249	0.529878	0.167315	-0.327189	12.0423	SAGA-dominated gene; TFIIH binding increased upon 3' heat shock
YKL109W	-0.987253	-1.002	-2.52604	0.202791	0.0758388	0.0280216	0.189991	-0.713654	-0.41136	0.49898	0.0438101	0.014331	11.8446	SAGA-dominated gene; TFIIH binding increased upon 3' heat shock
YER067W	-0.36797		-1.89906	0.0480426	0.897236	0.0462561	-0.404395	1.46147	-1.14154	0.17865	-0.481445	-1.0243	11.8382	SAGA-dominated gene; TFIIH binding increased upon 3' heat shock
YBR054W	-1.60991	-0.9485	-3.78496	0.246449	-0.520139	-0.313715	-1.22891	-0.27764		-0.22473	-0.22473	-2.5472	11.8332	SAGA-dominated gene; TFIIH binding increased upon 3' heat shock
YEL011W	-0.571849		-1.88559	-0.105842	0.837745	-0.0508693	-1.08493	-0.269801	-0.910982	0.639928	-0.135527	-2.01151	11.8275	SAGA-dominated gene; TFIIH binding increased upon 3' heat shock
YJL052W		-0.19698											11.809	SAGA-dominated gene; TFIIH binding increased upon 3' heat shock
YLR257W	-0.0466032	0.52201	-1.67665	-0.106345	0.0928708	-0.0251511	-0.792004	-0.232512	-0.404565	0.00756763	-0.198499	-0.609473	11.8048	SAGA-dominated gene; TFIIH binding increased upon 3' heat shock
YNL160W	-0.304088	0.17806	-1.87456		-0.214863			0.416519					11.7908	SAGA-dominated gene; TFIIH binding increased upon 3' heat shock
YDR380W	-0.687311		-1.58923	0.106209	-0.0114808	-0.0907436	0.286417	-0.917258		-0.094567	-0.094567	0.142385	11.7876	SAGA-dominated gene; TFIIH binding increased upon 3' heat shock
YNR014W	-1.65857		-3.91295		0.329944	0.276103	-0.368526	-0.921489	0.109501	0.528829	0.319165	-1.18293	11.777	SAGA-dominated gene; TFIIH binding increased upon 3' heat shock
YOR052C	0.6112	0.037696	-1.24758	0.0329378	-0.104934	-0.0258832	-0.439386	0.523327	-0.018071	0.500987	0.241458	-0.494076	11.7472	SAGA-dominated gene; TFIIH binding increased upon 3' heat shock
YER037W	-1.89593		-3.66423	0.0933588	-0.463003	-0.241201	-1.52799	-0.0883642	-0.536716	-0.19146	-0.364088	-1.91418	11.6557	SAGA-dominated gene; TFIIH binding increased upon 3' heat shock
YGR281W	-0.321215	-0.064767	-2.04649	0.0948367	-0.0838188	-0.140785	-0.236476	-0.51486	-0.543698	-0.47552	-0.509609	-0.570992	11.6331	SAGA-dominated gene; TFIIH binding increased upon 3' heat shock
YJL082W	-0.787823		-2.23427	0.0141309	0.244153	-0.0180466	-0.808322	-0.386249	-0.869692	-0.304284	-0.586988	-0.822365	11.4925	SAGA-dominated gene; TFIIH binding increased upon 3' heat shock
YGR243W	-1.05828		-3.7091	-0.0991114	0.781596	0.141567	-0.43419	-1.16158	-0.27907	1.07833	0.39963	-0.516837	11.4346	SAGA-dominated gene; TFIIH binding increased upon 3' heat shock
YOL084W	-0.906455		-1.77033	0.0703952	0.311758	-0.0577077	-0.091022	0.833454		0.811566	0.811566	-0.891166	11.4277	SAGA-dominated gene; TFIIH binding increased upon 3' heat shock
YAL060W	-0.776005	-1.3047	-1.53176	-0.0642875	0.0342707	-0.0954719	-0.312015	0.362257	-0.197728	-0.512256	-0.354992	-0.254718	11.4011	SAGA-dominated gene; TFIIH binding increased upon 3' heat shock
YBR071W	-0.674192	-0.38385	-2.38307	0.0365326	-0.290836	0.122459	-1.37699	-1.49753	-0.035398	0.450484	0.207543	-0.499126	11.4005	SAGA-dominated gene; TFIIH binding increased upon 3' heat shock
YDR247W	-1.11656		-3.053	0.157942	0.17933	-0.0362341	-0.116358	-1.72266	0.002618	0.38428	0.193449	0.058355	11.3337	SAGA-dominated gene; TFIIH binding increased upon 3' heat shock
YMR315W	-0.39068	-0.085218	-1.81108	-0.0210055	0.0835707	-0.110916	-1.16572	-0.468748	-0.260564	-0.284816	-0.27269	-1.2257	11.3313	SAGA-dominated gene; TFIIH binding increased upon 3' heat shock
YDL022W	0.0296559	-0.47496	-2.00449	0.0562058	-0.182611	-0.307536	-1.63549	0.468786	0.441236	0.545005	0.49312		11.3276	SAGA-dominated gene; TFIIH binding increased upon 3' heat shock
YNL327W	-0.906519	-1.2927	-2.45187	0.241808	-0.155397	0.0476114		0.600043	0.131232	0.204402	0.167817		11.3102	SAGA-dominated gene; TFIIH binding increased upon 3' heat shock
YHR071W	-1.22049		-3.56654	0.18163	0.150182	0.207061		-0.360075				-0.280612	11.2485	SAGA-dominated gene; TFIIH binding increased upon 3' heat shock
YPL004C	-0.571926	-0.55332	-2.34581	-0.0163573	0.320185	0.0692361	-0.361468	0.291708	0.051015	0.285786	0.1684	-1.1689	11.1724	SAGA-dominated gene; TFIIH binding increased upon 3' heat shock
YLR120C	-1.32785	-0.56323	-3.22568	-0.0535085	0.308627	0.17822	-1.08092	-1.72521	-0.220982	0.261032	0.0200248	-0.040194	11.172	SAGA-dominated gene; TFIIH binding increased upon 3' heat shock
YGR209C	0.0951732	0.031624	-1.49724	0.031644	-0.475829	0.0213285	-0.683182	0.593017				-1.02925	11.141	SAGA-dominated gene; TFIIH binding increased upon 3' heat shock
YGR088W	0.432904		0.003155	0.123107	-0.31337	0.0607827	0.997647	1.76047	1.16413	1.0729	1.11852	-0.633331	11.1385	SAGA-dominated gene; TFIIH binding increased upon 3' heat shock
YFR017C	-1.11011		-2.86954	-0.0337911	0.660823	0.333428	-0.793365		-1.05202	0.39467	-0.328674		11.0943	SAGA-dominated gene; TFIIH binding increased upon 3' heat shock
YDL222C	0.382808		-0.525197	-0.101107	-0.252248	0.0602325	0.71158	2.28284	1.25536		1.25536	-0.545341	11.0446	SAGA-dominated gene; TFIIH binding increased upon 3' heat shock
YHL024W	-0.186253		-1.74895	-0.0141036	-0.00749357	-0.0336297	-0.289076	0.351912	0.023351	-0.0209802	0.00118541	-0.21865	11.0446	SAGA-dominated gene; TFIIH binding increased upon 3' heat shock
YER053C	-0.674284		-1.53897	0.263716	-0.14539	-0.0597984	-0.456069	0.261894	-0.151991	0.0939511	-0.02902	-0.867427	10.9828	SAGA-dominated gene; TFIIH binding increased upon 3' heat shock
YPL058C	-1.3022	-0.32516	-3.42809	0.172141	-0.148599	-0.129581	-1.0755	-2.91373	-0.715384	-0.503225	-0.609304	-1.27312	10.9818	SAGA-dominated gene; TFIIH binding increased upon 3' heat shock
YNL015W	-1.61922	-1.9199	-3.61637	0.184817	-0.237636	-0.201107	0.613023	0.520492	0.559936	0.893079	0.726507	-0.206621	10.9496	SAGA-dominated gene; TFIIH binding increased upon 3' heat shock
YOR120W	0.559534		-0.67272	0.0318538	-0.00459997	0.104527	0.552679	0.363886	0.779661	0.774483	0.777072	-0.764927	10.8989	SAGA-dominated gene; TFIIH binding increased upon 3' heat shock
YOL151W	0.442912	-0.10151	-0.492079	-0.102549	-0.301193	-0.0237074	-0.104742	1.37912	0.251338	0.50783	0.379584	0.143723	10.8765	SAGA-dominated gene; TFIIH binding increased upon 3' heat shock
YJL144W	-0.370558		-1.79272	-0.0972046	-0.21348	-0.321259	-1.34113	-0.292522	-0.429465	0.0563669	-0.186549	-1.05587	10.876	SAGA-dominated gene; TFIIH binding increased upon 3' heat shock
YIL113W	0.143562		-1.20314	-0.0328598	0.0114932	-0.0660964	-0.7741	-0.374233	-0.346681	0.193373	-0.076654	-1.06061	10.8752	SAGA-dominated gene; TFIIH binding increased upon 3' heat shock
YPL230W	-1.00451		-3.20865	0.0250243	0.626934	0.15942	-0.905328	-1.9586	-1.31144	-0.685418	-0.99843	-1.60557	10.5571	SAGA-dominated gene; TFIIH binding increased upon 3' heat shock
YDR513W	0.654742	0.71448	-0.990136	-0.0488175	0.063459	0.114377	-0.552479	1.05884	0.105554	0.248418	0.176986	-0.881019	10.5042	SAGA-dominated gene; TFIIH binding increased upon 3' heat shock
YMR250W	0.471151		-0.769957	0.0579256	-0.0656941	-0.0842406	-0.249988	1.76557	0.845211	0.609901	0.727556	-0.832649	10.4659	SAGA-dominated gene; TFIIH binding increased upon 3' heat shock
YBR149W	-0.223219	-0.37937	-2.64029	0.169471	0.0610723	-0.0224585	-1.08891	-0.405718	-0.640548	-0.399591	-0.520069	-1.30873	10.3641	SAGA-dominated gene; TFIIH binding increased upon 3' heat shock
YIL116W	-0.771491	-0.1606	-2.80421	-0.11306	0.089747	-0.0886169	-1.34253	-1.04918	-0.52072	0.174414	-0.173153	-0.935487	10.2364	SAGA-dominated gene; TFIIH binding increased upon 3' heat shock
YML128C	0.285621		-0.984966	-0.109195	0.00674742	-0.11855		1.61952		1.00969	1.00969	-0.682489	10.2103	SAGA-dominated gene; TFIIH binding increased upon 3' heat shock
YDR001C	0.10768	0.099914	-0.867425	0.0842433	-0.107608	-0.0398863	-0.026992	0.662059	0.520855	0.415361	0.468108	-0.497025	10.1931	SAGA-dominated gene; TFIIH binding increased upon 3' heat shock
YBR139W	-0.216939	-0.38137	-3.12051	0.312302	0.05323	0.0250138	-0.986892	-0.232285	-0.193041	-0.41827	-0.305656	-1.49691	10.1002	SAGA-dominated gene; TFIIH binding increased upon 3' heat shock
YKL085W	0.260478	-0.52542	-1.50431	0.360209	-0.00308435	0.212293	-0.737002	1.5761	0.443402	0.781067	0.612235	-0.976507	10.0098	SAGA-dominated gene; TFIIH binding increased upon 3' heat shock
YGR248W	-0.471992		-2.7149	0.0917657	0.00160218	0.0058057	0.0438	1.36987	1.0745	0.59027	0.832383	-0.685672	9.89482	SAGA-dominated gene; TFIIH binding increased upon 3' heat shock
YDR453C	-0.46499		-3.10966	-0.129802	-0.164489	0.0395074	-1.51472	-0.974218	0.448828	0.358213	0.40352	-2.0601	9.86985	SAGA-dominated gene; TFIIH binding increased upon 3' heat shock
YPR002W	0.151888		-1.70843	-0.0318269	0.15051	0.141295	1.55783	0.677546	0.263823	0.866137	0.56498	1.48886	9.72622	SAGA-dominated gene; TFIIH binding increased upon 3' heat shock
YOR137C	-0.448796	0.25196	-1.55283		0.0957648	0.0267056	-1.30375	-0.303466	-0.4383	0.223359	-0.10747	-1.43558	9.71653	SAGA-dominated gene; TFIIH binding increased upon 3' heat shock
YBR287W	-0.579645	-0.47934	-1.71681	0.0448667	0.246814	0.165185	-1.08665	-0.393206	-0.399611	-0.0501086	-0.22486	-0.679139	9.68124	SAGA-dominated gene; TFIIH binding increased upon 3' heat shock
YKL091C	-0.270125		-2.20736	-0.00305802	0.0868581	-0.028835	-0.86125	-0.777566	0.312655	0.280609	0.296632	-1.88456	9.67007	SAGA-dominated gene; TFIIH binding increased upon 3' heat shock
YOR065W	-0.0977758		-1.5625	0.0986898	-0.128785	-0.029033	-0.787342	0.863082	0.047403	0.102958	0.0751803	-1.05045	9.65523	SAGA-dominated gene; TFIIH binding increased upon 3' heat shock
YJL161W	-0.226413		-2.25601	-0.141114	0.143875		-0.783061	0.582248	-0.468074	0.162725	-0.152675	-0.900168	9.62022	SAGA-dominated gene; TFIIH binding increased upon 3' heat shock
YOR220W	-0.677048		-2.06788	0.041782	0.0676107	0.0856002	-0.805642	-0.699231	0.174825	0.891071	0.532948	-0.449318	9.43671	SAGA-dominated gene; TFIIH binding increased upon 3' heat shock
YDR358W	-0.34522		-2.12243	0.0653331	0.267096	-0.0691609	-0.432912	-0.361399	-0.653475		-0.653475	-1.26129	9.39375	SAGA-dominated gene; TFIIH binding increased upon 3' heat shock
YFL054C	-0.963177		-3.23272	-0.0961549	0.64248	0.0767415	-0.709703	-1.04133	-1.34599	-0.357299	-0.851644	-1.49376	9.39089	SAGA-dominated gene; TFIIH binding increased upon 3' heat shock
YBR286W	-0.28686	-0.31892	-2.13458	0.0483878	0.184212	0.268725	-0.292846	0.786933	0.239104	0.352744	0.295924	-0.492892	9.2503	SAGA-dominated gene; TFIIH binding increased upon 3' heat shock
YDL110C	1.02372	-0.43434	-0.108512	-0.00097881	0.332801	-0.00488547	-0.608209	1.58644	0.276251	0.813303	0.544777	-0.559384	8.95031	SAGA-dominated gene; TFIIH binding increased upon 3' heat shock
YLR174W	-0.443095		-1.71428	0.0377901	0.426385	0.0136096	-0.310212	0.844587	0.27213	0.645687	0.458909	0.05694	8.91687	SAGA-dominated gene; TFIIH binding increased upon 3' heat shock
YER175C	-0.397758		-2.2979	0.0996902	0.0920766	-0.0161596	-2.0576	-0.582478	-0.133072	0.494852	0.18089	-1.55394	8.77259	SAGA-dominated gene; TFIIH binding increased upon 3' heat shock
YDL223C	0.0025676	-0.6183	-0.972304	0.0351548	-0.281358	-0.177141	0.537761	1.84627	0.981765	1.01497	0.99837	-1.02561	8.7039	SAGA-dominated gene; TFIIH binding increased upon 3' heat shock
YBL030C	-0.267299	-0.40376	-2.11662	0.151697	-0.161045	-0.0409908	-0.823188	0.206758		-0.147682	-0.147682	-1.17248		SAGA-dominated gene; TFIIH binding increased upon 3' heat shock
YBL064C	0.901305	-0.072801	-0.837914	0.144687	0.109307	0.145999	0.270501	2.20888	0.79552	1.0034	0.899462	0.346999		SAGA-dominated gene; TFIIH binding increased upon 3' heat shock
YBL078C	1.20996	1.183	0.219685	-0.0520064	0.200361	0.0842455	0.214161	1.40953		1.06024	1.06024	-0.168277		SAGA-dominated gene; TFIIH binding increased upon 3' heat shock
YBR105C	-1.28019		-3.15074	0.166584	-0.0166675	0.0930774	-0.368389	-0.980424	-0.346908	-0.046619	-0.196763	-0.631964		SAGA-dominated gene; TFIIH binding increased upon 3' heat shock
YBR132C	-0.169869	-0.19328	-1.82889	0.233935	0.577706	0.0499323	-0.735131	-1.27318	-0.280672	0.379033	0.0491807	-1.22651		SAGA-dominated gene; TFIIH binding increased upon 3' heat shock
YBR169C	0.151177		-1.16786	0.16103	-0.518152	-0.247374	-0.377376	0.232652	0.106264	0.00926873	0.0577664	-1.29981		SAGA-dominated gene; TFIIH binding increased upon 3' heat shock
YBR182C	-0.68108		-1.67498	0.0672212	-0.0523303	0.0680712	-1.21511	-0.160914	-0.426927	0.810745	0.191909	0.148982		SAGA-dominated gene; TFIIH binding increased upon 3' heat shock
YBR208C	-0.476598	-0.54032	-2.43932	-0.00899438	-0.287361	-0.13462	0.897814	0.120702	0.102865	-0.0372566	0.0328042	0.260373		SAGA-dominated gene; TFIIH binding increased upon 3' heat shock
YCL035C	0.35377	-0.06236	-1.48161	-0.0478997	0.0819795	0.219654	-0.826211	1.18985	0.312246	0.511139	0.411692	-1.17619		SAGA-dominated gene; TFIIH binding increased upon 3' heat shock
YCL042W	-1.45563		-1.3899	-0.0551075	0.340742	0.132917	0.724191	1.77382		1.46731	1.46731	0.296894		SAGA-dominated gene; TFIIH binding increased upon 3' heat shock
YCR005C	0.636584		0.199985	-0.0393172	-0.0337827	-0.129926	0.349694	0.642126		0.718062	0.718062	0.829635		SAGA-dominated gene; TFIIH binding increased upon 3' heat shock
YCR021C	-0.121285		-1.06798	0.192355	-0.896214	-0.467351		-0.357451		-0.0511086	-0.0511086	-1.31818		SAGA-dominated gene; TFIIH binding increased upon 3' heat shock
YCR091W	-0.603904		-2.4097	-0.00315749	0.625451	0.0700711	-0.984673	-0.780241	-1.24232	-0.0680079	-0.655162	-1.70653		SAGA-dominated gene; TFIIH binding increased upon 3' heat shock
YDL169C			-0.859971	0.0762292	0.574095	0.0709067	-0.134759	1.02033	-0.231669	0.653292	0.210811	-0.364997		SAGA-dominated gene; TFIIH binding increased upon 3' heat shock
YDR043C	-0.464633		-0.988692	0.138099	0.128405	-0.0104711	0.419974	1.2101	0.628199	1.41695	1.02258	-0.006523		SAGA-dominated gene; TFIIH binding increased upon 3' heat shock
YDR132C	-1.23804		-3.41821		0.103433	0.0886411		-2.05516		-0.251434	-0.251434	-0.339559		SAGA-dominated gene; TFIIH binding increased upon 3' heat shock
YDR148C	-0.154143	-0.4278	-2.07609	0.0546142	-0.127495	0.0404104	-0.601882	0.672637		0.680775	0.680775	-0.64666		SAGA-dominated gene; TFIIH binding increased upon 3' heat shock
YDR258C	-0.332807	0.64885	-1.95784	0.0609513	-0.685231	-0.59093	-0.744242	0.0188635	-0.029451	0.0619944	0.0162717	-1.40963		SAGA-dominated gene; TFIIH binding increased upon 3' heat shock
YDR277C	-1.48851		-4.30748	-0.000185503	0.442027	0.116836	-0.22076	-2.48962	-0.914158	0.193718	-0.36022	-0.451003		SAGA-dominated gene; TFIIH binding increased upon 3' heat shock
YDR330W	0.23591		-1.14395	0.127628	0.0807625	-0.0475938	-0.57097	0.0750294	-0.327909	0.0505415	-0.138684	-0.788475		SAGA-dominated gene; TFIIH binding increased upon 3' heat shock
YEL060C	-0.425854	-0.16859	-1.33794	0.124596	0.269429	0.181683	0.412413	1.46919	0.677443	1.30754	0.992493	0.828543		SAGA-dominated gene; TFIIH binding increased upon 3' heat shock
YER062C	-1.25391	-1.0578	-3.4218	0.133585	-0.312673	0.127234	-0.462295	-0.0932841				-1.20989		SAGA-dominated gene; TFIIH binding increased upon 3' heat shock
YGL184C	-0.325965		-0.69167	0.121457	0.280806	-0.0102591	0.562461	2.57988	1.09498	1.49539	1.29518	0.658069		SAGA-dominated gene; TFIIH binding increased upon 3' heat shock
YGR008C	0.0952478	0.26335	-1.61676		0.218531	-0.0220604	-0.096333		0.423376	0.626906	0.525141	-0.902993		SAGA-dominated gene; TFIIH binding increased upon 3' heat shock
YGR043C	0.85885		-1.53082	-0.137158	-0.201205	0.039856	-0.045523	0.906093	0.658181	0.357652	0.507917	-1.375		SAGA-dominated gene; TFIIH binding increased upon 3' heat shock
YGR161C	-0.890813		-2.28151	0.122144	0.345935	0.277382	-0.270945	-0.606804	-0.54131	0.0552999	-0.243005	0.07303		SAGA-dominated gene; TFIIH binding increased upon 3' heat shock
YHL028W	-0.758551		-2.49385	0.320323	-0.219627	0.00549203	-1.22782	-0.488889	-0.721423		-0.721423	-1.4961		SAGA-dominated gene; TFIIH binding increased upon 3' heat shock
YHR094C	-1.77229	-1.4264	-4.65086	0.115544	0.0657227	-0.0212096	-1.16041	0.0602729	-0.433952	0.0983799	-0.167786	-1.01451		SAGA-dominated gene; TFIIH binding increased upon 3' heat shock
YHR096C	-0.823792		-2.45328	0.184046	0.179349	0.00938786	-1.12624	0.0580148	0.055518	0.194631	0.125075	-1.2164		SAGA-dominated gene; TFIIH binding increased upon 3' heat shock
YHR097C	-0.671466		-2.31163	-0.0859283	0.657623	0.177808	-1.19063	-1.24864	-0.587633	0.445276	-0.0711785	-1.19009		SAGA-dominated gene; TFIIH binding increased upon 3' heat shock
YHR138C	0.236076	-0.57616	-1.91898	0.033584	0.243882	0.142854	-0.459453	0.134896	-0.011838	0.794397	0.391279	-0.040497		SAGA-dominated gene; TFIIH binding increased upon 3' heat shock
YHR139C	-1.11632			-0.0568276	-0.0444278	0.18186	-1.92994		-0.363901	-0.492547	-0.428224	-1.90099		SAGA-dominated gene; TFIIH binding increased upon 3' heat shock
YIL136W	0.370063		-1.67459	-0.0107308	0.292183	0.11609	-0.205247	1.39254	0.567218	0.330866	0.449042	-0.71973		SAGA-dominated gene; TFIIH binding increased upon 3' heat shock
YIL155C	0.25701		-1.47519	-0.00406677	0.529814	0.180573	-0.099873	0.854733	0.335399	0.584495	0.459947	-0.020544		SAGA-dominated gene; TFIIH binding increased upon 3' heat shock
YIR038C	0.0176859	0.36396	-2.40949	0.0606316	-0.095595	0.146181	-1.02612	0.643546	0.679424	0.561105	0.620264	-2.05645		SAGA-dominated gene; TFIIH binding increased upon 3' heat shock
YJR096W	-0.367843		-2.15809	-0.163054	-0.0652731	0.0793568	-1.80746	0.533138	0.114909	-0.106067	0.00442112	-2.57984		SAGA-dominated gene; TFIIH binding increased upon 3' heat shock
YKL163W	0.133544	-0.35292	-0.989246	0.118494	-0.000472425	0.255362	0.459499	2.06698	0.719041	1.26711	0.993076	0.717157		SAGA-dominated gene; TFIIH binding increased upon 3' heat shock
YKL164C	-0.310675	-0.47845	-1.00849	0.140669	0.0716726	0.309905	-0.020684	0.914926	-0.090789	0.544835	0.227023	-0.071986		SAGA-dominated gene; TFIIH binding increased upon 3' heat shock
YLL055W	-1.03337	-0.60824	-2.18939	-0.0462827	0.0528476	-0.052293	0.110114	-0.989956	-0.700825	-0.0571798	-0.379003	0.297048		SAGA-dominated gene; TFIIH binding increased upon 3' heat shock
YLR304C	-0.715136	-0.94536	-1.7907		-0.199991	-0.20088								SAGA-dominated gene; TFIIH binding increased upon 3' heat shock
YML004C	0.145606	0.0079701	-2.04684	0.0383313	-0.23119	-0.162693	-0.780781	-0.195562	-0.132022	-0.269797	-0.200909	-1.56221		SAGA-dominated gene; TFIIH binding increased upon 3' heat shock
YMR105C	-0.0019926		-1.20922	-0.083867	0.40197	-0.207861	0.739192		0.990671	1.04014	1.01541	-0.269183		SAGA-dominated gene; TFIIH binding increased upon 3' heat shock
YMR169C	0.455931		-0.585181	-0.0188612	-0.301391	0.0110372	0.567289	2.52363		1.07485	1.07485	-0.94521		SAGA-dominated gene; TFIIH binding increased upon 3' heat shock
YMR174C	0.351609	-0.3025	-2.05862	-0.00740187	0.0243758	0.216295	-0.465698	1.80611	1.04141	1.31806	1.17974	-1.58148		SAGA-dominated gene; TFIIH binding increased upon 3' heat shock
YMR175W	1.23155		1.07167	-0.0314311	-0.528933	-0.0545119	-1.13915	5.16771	1.82078	2.15059	1.98568	-3.59762		SAGA-dominated gene; TFIIH binding increased upon 3' heat shock
YMR181C	-0.846539		-2.70812	0.131947	0.0113832	0.0086637	-0.93311	-1.17669	-1.14467	-0.518523	-0.831597	-1.13307		SAGA-dominated gene; TFIIH binding increased upon 3' heat shock
YMR261C	-0.111375	-0.15573	-1.79684	0.0218143	0.0635767	0.274359	-0.787019	0.333683	-0.395325	0.102551	-0.146387	-1.34598		SAGA-dominated gene; TFIIH binding increased upon 3' heat shock
YNL007C		0.16963	-1.89533		-0.86455	-0.339949								SAGA-dominated gene; TFIIH binding increased upon 3' heat shock
YNL037C	0.149926	-0.39911	-1.25485	-0.00309933	-0.114049	0.0260026	0.502815	1.49817	0.584606	1.1072	0.845901	0.606352		SAGA-dominated gene; TFIIH binding increased upon 3' heat shock
YNL194C	-0.827033		-2.25884	0.0591018	0.759454	0.0778117	0.498565	-0.765421	0.160607	0.87817	0.519388	-0.883062		SAGA-dominated gene; TFIIH binding increased upon 3' heat shock
YNL195C	0.0121081		-1.2714	-0.248317	0.503722	0.246764	0.582993	-0.328732	0.310891	0.0358012	0.173346	-0.018827		SAGA-dominated gene; TFIIH binding increased upon 3' heat shock
YNL241C	-0.167143	-0.084279	-2.49955	-0.108054	0.238585	-0.0143911	-0.148922	0.402194	0.12161	0.0661111	0.0938606	-0.163668		SAGA-dominated gene; TFIIH binding increased upon 3' heat shock
YNL274C	0.569609	-0.11808	-1.1429	-0.0200096	-0.082149	-0.124746	-0.135254	1.41136	0.441	0.36037	0.400685			SAGA-dominated gene; TFIIH binding increased upon 3' heat shock
YNR001C	0.179237	0.063181	-0.79171	0.27992	-0.0387948	-0.101787	0.697619	1.98593	0.86905	0.899699	0.884374	0.571476		SAGA-dominated gene; TFIIH binding increased upon 3' heat shock
YOL016C	-1.29125	-0.52917	-2.9396	-0.119323	0.196454	-0.000878275	-0.693686	-1.59214	-0.41717	0.342709	-0.0372302	-0.185478		SAGA-dominated gene; TFIIH binding increased upon 3' heat shock
YOL143C	-0.164064	-0.5422	-2.1529	0.154938	0.0617209	0.0697636	-1.09739	0.0261	-0.358979	-0.32225	-0.340615	-0.601873		SAGA-dominated gene; TFIIH binding increased upon 3' heat shock
YOR032C	-0.299575		-1.54702	-0.13495	-0.0221709	-0.227398	0.448149	-0.896685	-0.603018	-0.305893	-0.454456	-0.372644		SAGA-dominated gene; TFIIH binding increased upon 3' heat shock
YOR062C	-1.01789		-2.5413	0.0708876	0.155377	0.287343	-0.298278	-1.54822	0.107569	0.905056	0.506312	-1.23271		SAGA-dominated gene; TFIIH binding increased upon 3' heat shock
YOR161C	-1.01116	-0.16738	-2.43604	-0.00459626	0.345871	0.150424	-0.587724	-0.860511	-0.039808	0.348358	0.154275	-0.696677		SAGA-dominated gene; TFIIH binding increased upon 3' heat shock
YOR173W	-0.196578		-1.77667	-0.0323834	0.0974599	0.0025219	-0.165672		0.627825	0.527494	0.57766	-1.15769		SAGA-dominated gene; TFIIH binding increased upon 3' heat shock
YOR267C	-0.497345	-0.53672	-2.23612	0.188115	-0.110543	0.049455	-0.847873	-1.34323	-0.477339	-0.232882	-0.355111	-0.573995		SAGA-dominated gene; TFIIH binding increased upon 3' heat shock
YPL154C	0.0329913	0.23777	-1.46099	0.165413	-0.0569069	-0.0466954	0.137466	1.12657	0.527345	0.635851	0.581598	0.031667		SAGA-dominated gene; TFIIH binding increased upon 3' heat shock
YPL186C	0.190093		-1.74747	0.107709	0.0207774	-0.0149978	-0.273112	-0.0251628	0.685057	0.51291	0.598983	-1.52304		SAGA-dominated gene; TFIIH binding increased upon 3' heat shock
YPL247C	-0.569791	-0.11937	-1.72649	-0.014203	0.221253	-0.0224578	-1.0598	-0.519933	-0.670879	-0.0237035	-0.347291	-0.770872		SAGA-dominated gene; TFIIH binding increased upon 3' heat shock
YPR184W			-1.57898	-0.00334505	0.0805767	-0.208204	-0.135241	1.1631	0.180934	0.208012	0.194473	-0.436493		SAGA-dominated gene; TFIIH binding increased upon 3' heat shock
YPR192W			-2.47608	-0.153028	0.15913	0.20454		-0.546879		0.63679	0.63679			SAGA-dominated gene; TFIIH binding increased upon 3' heat shock
YCR012W		-0.37686	-2.46927			-0.178922		-0.0421355		0.128409	0.128409		13.7156	SAGA-dominated gene; TFIIH binding no change upon 3' heat shock
YPL061W	-0.284924	-0.12579	-2.63504	0.041744	0.104495	-0.0284776	-0.29829	-0.476412	-0.085281	0.65411	0.284415	-0.623567	13.544	SAGA-dominated gene; TFIIH binding no change upon 3' heat shock
YGR052W	-1.78823		-3.96059	0.256917	-0.0290593	-0.0174843	-1.48336	-2.4066	-0.855245	-0.252421	-0.553833	-3.276	13.4157	SAGA-dominated gene; TFIIH binding no change upon 3' heat shock
YPR149W	0.333047	0.10101	-0.202955		-0.304296	0.121008	0.827556	1.15505		0.785293	0.785293		13.3848	SAGA-dominated gene; TFIIH binding no change upon 3' heat shock
YHR162W		-0.69793	-3.27568	-0.136345	0.0534861	-0.1074	-1.16611	-0.934141	-0.682084		-0.682084	-0.620483	13.1559	SAGA-dominated gene; TFIIH binding no change upon 3' heat shock
YNL231C	-0.612399	-0.93505	-2.93198	0.00195007	-0.352389	-0.148958	-1.33056	-0.904489	-0.464856	-0.386757	-0.425806	-1.03859	12.9088	SAGA-dominated gene; TFIIH binding no change upon 3' heat shock
YPL135W	-0.228327	0.13772	-2.04584	-0.0630538	-0.294526	-0.0179101	-0.313732	-0.0490201					12.8864	SAGA-dominated gene; TFIIH binding no change upon 3' heat shock
YKR093W	0.0935102	-0.17463	-0.208652	0.0581521	-0.225208	-0.141596	0.029739	1.17626	0.322583	0.88323	0.602906	0.33452	12.6264	SAGA-dominated gene; TFIIH binding no change upon 3' heat shock
YPR035W	-0.306719	-0.0072264	-1.24581		0.0787117	0.0205796				0.345225	0.345225		12.5932	SAGA-dominated gene; TFIIH binding no change upon 3' heat shock
YDR096W				-0.150201	-0.0270387		0.32935	3.02288	1.46933	1.34589	1.40761	-0.421756	12.5853	SAGA-dominated gene; TFIIH binding no change upon 3' heat shock
YNL036W	0.299573	0.24535	0.842369	-0.00566016	0.311647	0.358229	0.872359	2.14631	0.130591	0.924558	0.527574	0.76417	12.571	SAGA-dominated gene; TFIIH binding no change upon 3' heat shock
YKL150W	0.486384	0.51552	-0.280402	0.0732186	-0.266951	0.0109444	0.066097	1.91816	0.288015	0.242916	0.265466	-0.743143	12.5341	SAGA-dominated gene; TFIIH binding no change upon 3' heat shock
YBR118W		0.053352											12.5013	SAGA-dominated gene; TFIIH binding no change upon 3' heat shock
YEL071W		0.49026	-0.351057	-0.0357525	-0.177202	-0.0390061			0.044929	0.0838124	0.0643707		12.4397	SAGA-dominated gene; TFIIH binding no change upon 3' heat shock
YPR065W	0.0310184	0.18564	-1.11305		-0.448238	0.140916		-0.141359		0.719217	0.719217		12.4064	SAGA-dominated gene; TFIIH binding no change upon 3' heat shock
YAL038W		-0.46772		0.00713763	-0.101788		-0.638079						12.3605	SAGA-dominated gene; TFIIH binding no change upon 3' heat shock
YPL024W	-0.334516	0.29342	-1.8619	0.0970654	-0.258931	-0.0725202	-0.453016	-1.55919	-0.752431	-0.40907	-0.580751	-0.495093	12.2659	SAGA-dominated gene; TFIIH binding no change upon 3' heat shock
YHR174W	-0.450423	-0.51926											12.2207	SAGA-dominated gene; TFIIH binding no change upon 3' heat shock
YKL096W	-1.92552	0.67743	-5.3922	0.0814797	0.434586	0.144068	-2.25564	-2.80123	-0.490857	-0.216556	-0.353706	-3.31021	12.1471	SAGA-dominated gene; TFIIH binding no change upon 3' heat shock
YKL151C	0.336081	0.069192	-0.855846	0.172342	-0.392241	-0.159108		1.93904		0.820299	0.820299		12.0459	SAGA-dominated gene; TFIIH binding no change upon 3' heat shock
YPR138C	-0.326855	-0.22177	-1.86911	0.279354	-0.14398	-0.0207318	-0.629431	-0.522923	-0.047676	-0.375736	-0.211706	-0.73442	11.9493	SAGA-dominated gene; TFIIH binding no change upon 3' heat shock
YGR041W	-0.777197	0.021991	-3.23038	0.107686	-0.0519205	-0.0015422	-0.494227	-1.43364	-0.724283		-0.724283	-0.405492	11.9134	SAGA-dominated gene; TFIIH binding no change upon 3' heat shock
YJL078C	-0.796906		-3.15549	0.170358	0.147726	0.13767	0.639402	-1.0125	-0.367475	-0.587136	-0.477305	0.458527	11.9079	SAGA-dominated gene; TFIIH binding no change upon 3' heat shock
YMR199W	-1.09567	0.40695	-4.08971	0.108142	-0.286387	0.00920668	-1.99453	-2.4971	-0.723493	-0.475426	-0.599459		11.8716	SAGA-dominated gene; TFIIH binding no change upon 3' heat shock
YJL159W	-0.121996	-0.37286	-1.03709	0.15837	-0.0194546	0.134568		1.36805		0.798085	0.798085		11.8263	SAGA-dominated gene; TFIIH binding no change upon 3' heat shock
YJR104C	-0.952428	-0.95016	-2.46992	0.17594	-0.0305569	0.279997		0.834477		0.649216	0.649216		11.7683	SAGA-dominated gene; TFIIH binding no change upon 3' heat shock
YGR254W	-0.473977	-0.15131						-0.424891		0.179313	0.179313		11.7247	SAGA-dominated gene; TFIIH binding no change upon 3' heat shock
YOL011W	-1.289	-0.42908	-3.37046	0.0810957	-0.273213	-0.166211	-1.56616	-1.92815	-0.228548	-0.605639	-0.417094	-1.90249	11.7229	SAGA-dominated gene; TFIIH binding no change upon 3' heat shock
YGR014W	-0.805872	-0.025418	-3.72819	0.00349093	0.0225353	0.0727991	-2.16083	-1.51818	-0.437403		-0.437403		11.721	SAGA-dominated gene; TFIIH binding no change upon 3' heat shock
YFL021W	-0.501183		-1.39494	-0.0432809	-0.049592	0.146583	0.44626	0.177709	-0.158782	-0.153736	-0.156259	0.530107	11.6729	SAGA-dominated gene; TFIIH binding no change upon 3' heat shock
YJL088W	-1.47165			0.159013	-0.123445	-0.0274526	-1.16264	-0.712582	-0.304942	0.466206	0.0806318	-0.803692	11.6103	SAGA-dominated gene; TFIIH binding no change upon 3' heat shock
YLR438W	-0.209692	-0.82482		0.11679	-0.176242	0.065663	0.536755	0.368999	0.43991	0.23428	0.337095	1.76996	11.6039	SAGA-dominated gene; TFIIH binding no change upon 3' heat shock
YDR033W	-0.418353	-0.75867	-2.37997	0.114086	-0.156948	-0.0165258	-1.0413	-0.0134778	-0.539777	-0.140448	-0.340113	-1.0765	11.4979	SAGA-dominated gene; TFIIH binding no change upon 3' heat shock
YPL221W	-1.05875	-0.4109	-3.16878	0.135357	0.090535	0.0783506	-1.30974	-1.85393	-0.203231	-0.0753145	-0.139273	-1.33972	11.49	SAGA-dominated gene; TFIIH binding no change upon 3' heat shock
YPL177C	-0.601909	-0.55267	-2.27888	0.097176	-0.168382	0.0064063	-0.40674	-0.603845	-0.407468	-0.0724214	-0.239945	-0.550043	11.3723	SAGA-dominated gene; TFIIH binding no change upon 3' heat shock
YDL070W	-1.64484		-2.50071	0.120756	-0.11124	0.00203081	-0.261135	0.522195	0.376045	1.09365	0.734847	0.004677	11.3694	SAGA-dominated gene; TFIIH binding no change upon 3' heat shock
YOL059W	-0.438428	-0.96388	-3.3409	-0.0386868	-0.131552	0.0216563	-0.264347	-2.30545	-0.409244	-0.146861	-0.278052	0.11557	11.3482	SAGA-dominated gene; TFIIH binding no change upon 3' heat shock
YMR011W	-1.09455	-0.40979	-4.55667	-0.193412	0.457184	0.188182	-0.660973	-1.30726	-0.430165	0.408721	-0.010722	-0.626474	11.3391	SAGA-dominated gene; TFIIH binding no change upon 3' heat shock
YPL075W	-0.57428	-0.21088	-2.43363	-0.0621833	-0.272268	-0.0250646	-1.08984	-0.862452	-0.255677	-0.0210955	-0.138386	-1.39178	11.3326	SAGA-dominated gene; TFIIH binding no change upon 3' heat shock
YPL111W	-0.126126	0.043064	-0.893931	0.0136617	-0.0547372	-0.0381243	0.119835	0.162592	0.04826	-0.0743351	-0.0130375	-0.053645	11.2808	SAGA-dominated gene; TFIIH binding no change upon 3' heat shock
YPL026C	-0.649427	-0.49951	-2.36665	0.0534358	-0.336022	0.00590689	-0.331181		-0.463352	0.0736076	-0.194872	-0.610806	11.2703	SAGA-dominated gene; TFIIH binding no change upon 3' heat shock
YLR142W	-1.02791		-2.07305	0.275018	-0.0578881	-0.105076	2.04658	-0.172178	0.201079	0.0584791	0.129779		11.227	SAGA-dominated gene; TFIIH binding no change upon 3' heat shock
YOR264W	-0.528329	-0.12898	-2.66017	0.0459127	0.0331617	0.296416	0.323992	-1.2405	-0.281189	0.0239456	-0.128622	0.346556	11.1605	SAGA-dominated gene; TFIIH binding no change upon 3' heat shock
YGR204W	-0.421589	0.41151	-2.09539	0.0796154	0.0701975	-0.00212218	-1.38596	-0.200846	-0.471487	-0.17335	-0.322418	-1.16814	11.1293	SAGA-dominated gene; TFIIH binding no change upon 3' heat shock
YLR297W	-1.80114	-0.95495	-3.40928	0.15618	-0.729251	-0.223159	-0.615949	-1.30251	-0.88818	-0.807106	-0.847643	-0.436766	11.027	SAGA-dominated gene; TFIIH binding no change upon 3' heat shock
YKL185W	-1.17464		-3.01372	-0.109351	0.00431565	0.254423	0.236298	-0.212585	-0.10878	0.286808	0.0890139	0.476374	10.9903	SAGA-dominated gene; TFIIH binding no change upon 3' heat shock
YCL030C	-1.5613	-0.52798	-3.1447	-0.00785113	0.0927066	-0.17482	-1.15428	-0.495135	0.00541	0.46862	0.237015	-1.086	10.9708	SAGA-dominated gene; TFIIH binding no change upon 3' heat shock
YGR032W	-0.950495	0.74813	-3.17978	0.174648	-0.129437		-0.716464	-2.32369	-0.338909	0.0177039	-0.160603	-0.691134	10.9624	SAGA-dominated gene; TFIIH binding no change upon 3' heat shock
YDR222W	-1.79692		-4.91163	0.128271	-0.672235	-0.184746	-3.69118	-1.96757	-0.562603	-0.360811	-0.461707	-3.79809	10.9418	SAGA-dominated gene; TFIIH binding no change upon 3' heat shock
YLR153C	-0.64727	-0.37253	-3.39856	0.127105	-0.0706378	-0.0431763	-0.789948	-1.38293	-1.03008	-1.02202	-1.02605	-0.077022	10.9248	SAGA-dominated gene; TFIIH binding no change upon 3' heat shock
YPL054W	-0.47618		-2.08703	0.0265229	0.290477	-0.0983398	-0.259385	-0.507628	-0.35935	0.620526	0.130588	-1.02272	10.9228	SAGA-dominated gene; TFIIH binding no change upon 3' heat shock
YNL192W	-0.864698	-0.25503	-2.42097	0.0658448	0.218299	-0.00208499	-0.458851	-0.497124	0.106436	0.772844	0.43964	-0.433524	10.9131	SAGA-dominated gene; TFIIH binding no change upon 3' heat shock
YDR085C	0.174298		-0.721962		-0.0634079	0.22277				0.475857	0.475857		10.9004	SAGA-dominated gene; TFIIH binding no change upon 3' heat shock
YER159C	0.491598	0.36647	-0.778199	-0.0337443	-0.0118823	0.0885501	-0.3357	0.269152	0.042917	0.581648	0.312283	-0.037366	10.8329	SAGA-dominated gene; TFIIH binding no change upon 3' heat shock
YKR013W		-1.056		0.0639224	0.0753269			-1.49065					10.8212	SAGA-dominated gene; TFIIH binding no change upon 3' heat shock
YLR079W	-0.0055175	-0.73744	-1.71201	0.0736541	-0.0985831	-0.0383215	-0.015587	-0.733088	-0.523428	-0.233887	-0.378657	0.548628	10.792	SAGA-dominated gene; TFIIH binding no change upon 3' heat shock
YDR055W	-1.31018	-0.43727	-2.61975	0.238441	-0.138797	0.0950867	0.735058	1.05831	0.494763	0.563868	0.529316	-0.059186	10.7426	SAGA-dominated gene; TFIIH binding no change upon 3' heat shock
YPL274W	-0.603193	0.23662	-1.3496	0.106029	-0.0347208	-0.0745239	-0.727839	-0.156734	-0.080747	-0.17062	-0.125683	-0.806064	10.7299	SAGA-dominated gene; TFIIH binding no change upon 3' heat shock
YML028W	-0.182316	-0.30362	-1.24248	-0.00773473	-0.144873	0.158634	-0.415719	0.845802		0.506525	0.506525	-0.505037	10.6798	SAGA-dominated gene; TFIIH binding no change upon 3' heat shock
YNL220W	-0.641415	-0.55525	-3.00695	-0.0475404	-0.117215	-0.0819769		-0.643574	-0.374799	-0.268404	-0.321601	-1.67312	10.5806	SAGA-dominated gene; TFIIH binding no change upon 3' heat shock
YMR189W	-0.374928	-0.78444	-1.78184	0.00153817	0.0626629	-0.0917361	-1.09831	0.668782	0.189245	0.653332	0.421289	-1.2582	10.5311	SAGA-dominated gene; TFIIH binding no change upon 3' heat shock
YKR067W	-0.0373461	0.0067213	-1.98051	-0.0935938	0.428324	0.0566492	-0.935796	-0.975335	-0.487988	-0.0811568	-0.284573	-1.70079	10.4955	SAGA-dominated gene; TFIIH binding no change upon 3' heat shock
YDR086C	-0.63876	0.079878	-2.69699	-0.0667955	0.530589	0.00718056	-1.12356	-0.631445	-0.702833	0.292619	-0.205107	-1.64997	10.4862	SAGA-dominated gene; TFIIH binding no change upon 3' heat shock
YDL131W	-0.174851	-0.28746	-2.77943	0.0829988	0.111417	0.0608959		-0.532176	-0.697873	-0.0840041	-0.390939	-1.19498	10.473	SAGA-dominated gene; TFIIH binding no change upon 3' heat shock
YER052C		0.12813	-2.12288	0.165625	-0.18306	0.00980319	-1.50506	-0.443403	-0.159476	-0.134989	-0.147232	-1.21288	10.4405	SAGA-dominated gene; TFIIH binding no change upon 3' heat shock
YOR107W	-1.6876		-2.61775	0.177576	-0.535262	-0.212494	-0.511133	-1.33938	-0.497271	-0.965648	-0.731459		10.435	SAGA-dominated gene; TFIIH binding no change upon 3' heat shock
YGR240C	-0.714609	-0.074384	-3.41594	0.142465	-0.107733	-0.381703	-1.11043	-1.73365	-0.056497	-0.622387	-0.339442	-1.26046	10.3898	SAGA-dominated gene; TFIIH binding no change upon 3' heat shock
YPL163C	-1.54923	-0.34417	-4.67853	0.13312	-0.0741105	0.133942	-2.96821	-2.0562	-0.615977	-0.0967436	-0.35636		10.3004	SAGA-dominated gene; TFIIH binding no change upon 3' heat shock
YKR058W	-0.818522		-2.33483	-0.0218839	0.732383	0.211475	-0.799347	-0.850112	-0.684125	0.62793	-0.0280971	-1.07223	10.2819	SAGA-dominated gene; TFIIH binding no change upon 3' heat shock
YMR266W	-0.903279	-0.8618	-3.25781	0.0787935	0.0301058	-0.00076327	-1.88277	-1.78661	-0.942448	-0.392508	-0.667478	-1.46816	10.257	SAGA-dominated gene; TFIIH binding no change upon 3' heat shock
YNL190W	-0.0513297	-0.18449	-1.29852	0.148118	-0.146132	0.087422	-0.694332	-0.290891	-0.313756	0.0285604	-0.142598	-0.7553	10.2155	SAGA-dominated gene; TFIIH binding no change upon 3' heat shock
YBL043W	-1.27795		-3.26328	0.112916	-0.47548	0.194453	-0.061714	0.995942	-0.087765	1.45267	0.682452	0.096332	10.2155	SAGA-dominated gene; TFIIH binding no change upon 3' heat shock
YBR145W	-0.832585		-3.55058	-0.0772222	0.0501504	0.113851	-1.40778	-1.10182	-0.160731	0.0883448	-0.0361931	-1.54111	10.2135	SAGA-dominated gene; TFIIH binding no change upon 3' heat shock
YBR183W	-1.26371		-3.203	-0.00133637	-0.180315	-0.256924	-1.00582	-0.275794	-0.559699	0.0558805	-0.251909	-0.326081	10.1683	SAGA-dominated gene; TFIIH binding no change upon 3' heat shock
YOL058W	-0.635153		-4.06202	0.00586005	0.2038	0.107576	-1.24765	-0.284095		0.646607	0.646607	-0.932459	10.1519	SAGA-dominated gene; TFIIH binding no change upon 3' heat shock
YER070W	-1.17624	-0.85721	-4.96488	-0.0802574	-0.396539	-0.157851	-2.08414	-1.37395	-0.354598	-0.439662	-0.39713	-1.98074	10.1263	SAGA-dominated gene; TFIIH binding no change upon 3' heat shock
YKR091W	-0.955424		-1.77151	-0.0696429	0.352744	0.251012	-0.389585		-0.12008	0.228783	0.0543514	0.225995	10.053	SAGA-dominated gene; TFIIH binding no change upon 3' heat shock
YER020W	-0.34522	-0.40469	-1.70537	-0.189144	0.385935	0.154321	-0.921445	-0.739452		0.75073	0.75073	-0.580653	10.0394	SAGA-dominated gene; TFIIH binding no change upon 3' heat shock
YMR196W	0.911154		-0.473594	0.0515938	0.0356068	-0.0606067	0.021233	1.90893	0.608586	0.600815	0.604701	-0.450212	10.0325	SAGA-dominated gene; TFIIH binding no change upon 3' heat shock
YKR076W	-0.757579		-3.36747	-0.160106	0.247382	0.0449488		-1.372	-0.874773	-0.435366	-0.65507	-2.21538	10.0042	SAGA-dominated gene; TFIIH binding no change upon 3' heat shock
YDL048C	-2.21302		-4.20962	0.236203	-0.684648	-0.121153	-0.742253	-0.424729	-0.469421	-0.648661	-0.559041	-0.943746	9.9508	SAGA-dominated gene; TFIIH binding no change upon 3' heat shock
YLR027C	-0.0650418	-0.069941	-2.0013	0.111184	0.135425	0.213595	-0.878266	0.039571	-0.109138	0.301223	0.0960424	0.084806	9.93615	SAGA-dominated gene; TFIIH binding no change upon 3' heat shock
YMR107W	-0.0513899		-0.017489	-0.364366	0.317919		1.65555	1.89224	0.566168	1.59496	1.08057	0.53286	9.90438	SAGA-dominated gene; TFIIH binding no change upon 3' heat shock
YJL171C	-0.0293699	0.065965	-1.1887	0.128022	0.188953	0.157685	-0.473861	-0.556521	0.004945	0.611165	0.308055	0.076263	9.87652	SAGA-dominated gene; TFIIH binding no change upon 3' heat shock
YAR015W		-0.63848	-1.87091	-0.10613	0.21839	0.182599	-1.09975	0.364169		0.667869	0.667869	-1.5139	9.75377	SAGA-dominated gene; TFIIH binding no change upon 3' heat shock
YHL035C	-0.426555		-1.19355	-0.00898513	0.0916625	-0.0813675	-0.66196	0.707326	-0.257396	0.296772	0.0196881	-0.019835	9.75099	SAGA-dominated gene; TFIIH binding no change upon 3' heat shock
YMR134W	0.007327	-0.084968	-2.41299	0.030516	-0.0140158	0.156981	-0.8966	-0.463112	-0.178033	0.243473	0.0327198	-0.728214	9.71195	SAGA-dominated gene; TFIIH binding no change upon 3' heat shock
YLR345W	0.341894		-1.39582	0.180029	0.329821	0.290712	-0.228902	0.138538	-0.465149	0.463781	-0.000684176	-0.05503	9.67184	SAGA-dominated gene; TFIIH binding no change upon 3' heat shock
YGL248W	-0.59189	0.35681	-1.69209	0.0720991	0.113164	0.124876	-0.55986	-0.925961	-0.07512	0.347581	0.136231	-0.653149	9.64024	SAGA-dominated gene; TFIIH binding no change upon 3' heat shock
YLL012W	-1.09136	-1.2724	-3.16278	-0.0698673	-0.135425	-0.0512637	-0.80642	-1.05408	-0.898589	-0.780327	-0.839458	0.86464	9.54368	SAGA-dominated gene; TFIIH binding no change upon 3' heat shock
YDR397C	-0.669148	-2.0362	-1.8061	-0.0259726	-0.0306454	0.00835549	-0.710924	-0.355396	-0.451395	-0.0263888	-0.238892	-0.931322	9.48717	SAGA-dominated gene; TFIIH binding no change upon 3' heat shock
YHR209W	-0.21841		-1.92956	-0.0212327	0.254364	0.129584	-0.053102	0.195557	-0.359713	-0.0139597	-0.186836	0.597227	9.48449	SAGA-dominated gene; TFIIH binding no change upon 3' heat shock
YNR044W	-1.4378	-1.1778	-2.76168	0.150914	0.210038	0.346153	0.121085	1.22996		1.30079	1.30079	-0.357162	9.45464	SAGA-dominated gene; TFIIH binding no change upon 3' heat shock
YCL055W	-0.328948	-1.5988	-1.46163	0.00696826	-0.0787598	0.190353	0.125303	0.111158	0.199513	0.869013	0.534263	0.408222	9.41785	SAGA-dominated gene; TFIIH binding no change upon 3' heat shock
YGL158W	-1.89359		-3.77565	-0.0584998	0.332718	0.0991836	-0.123548	-1.79825	-0.236718	0.994391	0.378836	-1.75601	9.40301	SAGA-dominated gene; TFIIH binding no change upon 3' heat shock
YMR182C	-0.680214		-2.64235	-0.0573294	0.00238414	0.188313	-1.27299	-1.45464	-0.580238	-0.57729	-0.578764	-1.39705	9.36121	SAGA-dominated gene; TFIIH binding no change upon 3' heat shock
YMR316W	-1.77138		-3.00758	-0.0395979	0.0212641	0.221495	-0.784343	-1.45904	-0.214989	0.581247	0.183129	0.171777	9.30682	SAGA-dominated gene; TFIIH binding no change upon 3' heat shock
YGL157W	-0.623177	-1.0119	-3.34675	0.00671971	-0.172731	-0.0624954	-1.81803	-0.771303	-0.774474	-0.238542	-0.506508	-1.69448	9.23601	SAGA-dominated gene; TFIIH binding no change upon 3' heat shock
YBR006W	-0.975573		-3.14766	-0.0905849	-0.206877	0.0154074	-1.41818	-0.609867	-0.416873	-0.414545	-0.415709	-2.51167	9.19804	SAGA-dominated gene; TFIIH binding no change upon 3' heat shock
YIR032C	-1.01241		-2.72428	-0.0239806	-0.315507		0.635718	1.04954	1.10396	0.910894	1.00743	-0.215192	9.15903	SAGA-dominated gene; TFIIH binding no change upon 3' heat shock
YGR087C	-0.583812		-1.83331	0.267829	-0.253603			0.13578	0.260185	0.0140442	0.137115	-0.104927	9.09099	SAGA-dominated gene; TFIIH binding no change upon 3' heat shock
YOR084W	-1.17575		-3.32992	0.115377	-0.0920814	0.0619691	-2.03867	-1.76047	-0.334326	-0.367077	-0.350702	-1.99498	9.08923	SAGA-dominated gene; TFIIH binding no change upon 3' heat shock
YLR121C	-2.16298		-4.55523	-0.0387451	0.0215328	0.141629	-0.485307	-1.04242	-0.100056	0.298022	0.0989828		9.06429	SAGA-dominated gene; TFIIH binding no change upon 3' heat shock
YMR090W	0.161171	-0.6042	-1.31625	0.0762138	-0.115522	0.150971	-0.463164	1.05565	0.334025	0.610942	0.472484	-0.796335	8.95128	SAGA-dominated gene; TFIIH binding no change upon 3' heat shock
YDR392W		-1.4573		0.00557217	0.0512286	0.121828	-1.28681	-1.52157	-1.09916	0.698667	-0.200248	-1.74613	8.92481	SAGA-dominated gene; TFIIH binding no change upon 3' heat shock
YBR005W	-0.802472	-0.36625	-2.25473	-0.157931	0.397714	0.299508	-0.477093	-0.690437	-0.056633	0.75607	0.349719	-0.109058	8.88366	SAGA-dominated gene; TFIIH binding no change upon 3' heat shock
YMR303C		-0.46477			-0.239553								8.78572	SAGA-dominated gene; TFIIH binding no change upon 3' heat shock
YMR171C	-0.960386		-2.60848	0.0273727	-0.0294767	0.105875	-1.60081	-0.160774	-0.32727	-0.129809	-0.228539	-1.89559	8.72905	SAGA-dominated gene; TFIIH binding no change upon 3' heat shock
YCR089W	-0.693376	-1.0361	-2.26543	0.111306	0.368835	0.338844	-0.379004	0.0858785	0.481521	0.605043	0.543282	-0.928412	8.55075	SAGA-dominated gene; TFIIH binding no change upon 3' heat shock
YOR337W	-0.689116	-0.4292	-2.6356	0.142558	-0.272885	0.0425816	-1.71867	-0.833611	-0.225276	-0.0290941	-0.127185	-1.1339	8.5157	SAGA-dominated gene; TFIIH binding no change upon 3' heat shock
YDR435C	-0.0774881		-2.76708	-0.122339	0.284002	0.124172	-1.36555	-1.15158	-0.945913	0.0856006	-0.430156		8.50779	SAGA-dominated gene; TFIIH binding no change upon 3' heat shock
YBR102C	-0.631015		-1.43307		-0.0500913	0.00853542		-0.728164					8.42487	SAGA-dominated gene; TFIIH binding no change upon 3' heat shock
YHR143W-A	-0.194514		-1.59444	0.219834	-0.0835912	0.0714092	-1.55062	-1.07452	-1.47595	-0.921255	-1.1986	-1.65015	8.27457	SAGA-dominated gene; TFIIH binding no change upon 3' heat shock
YFR055W	-1.64873	-1.1625	-4.34336	0.148309	-0.466698	-0.162457	-1.12478	-1.10946	-1.15134	-0.65492	-0.903129	-1.4162	8.27302	SAGA-dominated gene; TFIIH binding no change upon 3' heat shock
YDL198C	-1.24743	-0.25846	-4.22208	0.103165	0.0196932	0.0225908	-2.41108	-1.2354	-1.0665	-0.522493	-0.794498	-1.69178	7.8009	SAGA-dominated gene; TFIIH binding no change upon 3' heat shock
YAL062W			-2.19461	-0.0861863	0.055934	0.148448		-0.936732				-1.11216	7.34282	SAGA-dominated gene; TFIIH binding no change upon 3' heat shock
YAL031C			-1.09234		0.162707	0.10205		-0.314406		-0.10799	-0.10799			SAGA-dominated gene; TFIIH binding no change upon 3' heat shock
YAL037W					-0.201766	-0.0576093						-2.96607		SAGA-dominated gene; TFIIH binding no change upon 3' heat shock
YAL040C	-0.307402	-0.2199	-1.41012	0.223021	0.0708447	0.0746942	-0.372267	-0.636776	-0.29583	-0.163198	-0.229514	-0.236053		SAGA-dominated gene; TFIIH binding no change upon 3' heat shock
YAL044C	-0.595146	-1.1552	-2.9772	0.00723363	-0.355484		-1.86498	-0.462507	-0.684418	-0.0585184	-0.371468	-1.26373		SAGA-dominated gene; TFIIH binding no change upon 3' heat shock
YAL053W	-1.01278	-0.66666	-2.81677		0.150824	0.305982	-1.27878	-1.21236	-0.759503		-0.759503	-0.936295		SAGA-dominated gene; TFIIH binding no change upon 3' heat shock
YAR028W	-0.845547		-2.29015			0.0965128		-1.53485						SAGA-dominated gene; TFIIH binding no change upon 3' heat shock
YBL101C	-0.854581	-0.47549	-2.85183	0.0475156		0.123029				0.736734	0.736734			SAGA-dominated gene; TFIIH binding no change upon 3' heat shock
YBR004C	-0.976749	-0.71635	-2.98127	-0.174067	-0.0846684	0.188016	-1.1053	-1.33731	-0.871023	-0.329026	-0.600025			SAGA-dominated gene; TFIIH binding no change upon 3' heat shock
YBR085W		-0.22237			-0.774573	-0.0116679		-1.54535				-2.15048		SAGA-dominated gene; TFIIH binding no change upon 3' heat shock
YBR115C	-0.308261	-0.61706	-2.32579	0.260057	0.0763025	-0.0548411	-1.03862	-0.7583	-0.317262	-0.265655	-0.291459	-1.74943		SAGA-dominated gene; TFIIH binding no change upon 3' heat shock
YBR157C				0.289536	-0.679783	-0.119433	-0.812501		0.037641		0.037641	-1.07254		SAGA-dominated gene; TFIIH binding no change upon 3' heat shock
YBR218C	-0.847571	-0.89286	-3.16241	0.154756	0.0451677	-0.0690306	-1.64883	-1.68038		-0.529305	-0.529305	-1.59789		SAGA-dominated gene; TFIIH binding no change upon 3' heat shock
YBR244W	-0.9998	-1.493	-3.27705	0.153509	-0.184972	-0.0537728	-0.243672	-0.463448	-0.075383	0.229137	0.0768772	-1.1969		SAGA-dominated gene; TFIIH binding no change upon 3' heat shock
YCL025C	-0.704382	-0.095479	-2.68747	0.0870443	0.0178271	0.125848	0.667242	0.348996	0.529086	1.15219	0.84064	0.123291		SAGA-dominated gene; TFIIH binding no change upon 3' heat shock
YCR099C	-0.219591		-1.59231	0.106177	0.227181	0.0425295	0.050494	-0.543023	-0.768179	-0.250307	-0.509243	0.158371		SAGA-dominated gene; TFIIH binding no change upon 3' heat shock
YDL107W	-0.189656		-1.95868	0.0443265	-0.0174801	0.00161316		-0.512597	-0.756426	-0.0779672	-0.417197	-1.49402		SAGA-dominated gene; TFIIH binding no change upon 3' heat shock
YDL113C	-0.0884467		-1.15453	0.00114848	0.116681	-0.0617941	-0.839653	-0.122	-0.306068	0.212132	-0.0469684	-0.892881		SAGA-dominated gene; TFIIH binding no change upon 3' heat shock
YDL174C	-0.372357	-0.2143		-0.0735134	0.102804	0.264628		-1.14174	-0.607934	0.386798	-0.110568	-0.964755		SAGA-dominated gene; TFIIH binding no change upon 3' heat shock
YDL204W	0.741086		0.752745	0.225011	-0.242919	0.0528202	1.07593	3.02643	1.09101	1.38706	1.23903			SAGA-dominated gene; TFIIH binding no change upon 3' heat shock
YDL210W	-1.12995	-0.344	-3.63946	-0.0801095	-0.097832	0.117345	-1.05593			-0.716314	-0.716314			SAGA-dominated gene; TFIIH binding no change upon 3' heat shock
YDL234C	-0.645807	-0.11281	-1.63647	-0.163484	0.380802	0.17213	-0.303856	-0.292345	-0.073805	0.830948	0.378572	0.287375		SAGA-dominated gene; TFIIH binding no change upon 3' heat shock
YDL238C	-0.662751		-1.59883	0.00998557	-0.0980595	-0.173787	-0.696056	-0.124644	-0.253828	-0.276987	-0.265408	-1.04588		SAGA-dominated gene; TFIIH binding no change upon 3' heat shock
YDR050C	-0.782115	-0.54113	-3.62958	0.203595	-0.307109	-0.0463221	-0.784154	-0.985377		0.218973	0.218973	-1.42942		SAGA-dominated gene; TFIIH binding no change upon 3' heat shock
YDR255C	0.0963325		-1.61715	0.13887	0.241138	-0.0643948	-0.851848	-0.251442	-0.361903	0.0745677	-0.143668	-1.41498		SAGA-dominated gene; TFIIH binding no change upon 3' heat shock
YDR276C	-1.37837	-0.42318		0.37015	-0.193112	0.0246979	-0.206294	-0.667837	-0.04097	0.244112	0.101571	-0.896494		SAGA-dominated gene; TFIIH binding no change upon 3' heat shock
YDR507C	-0.387556	0.30294	-1.46626	-0.0271005	-0.441993	-0.56022	-1.11101	0.329132	-0.231429	0.170703	-0.0303629	-1.10703		SAGA-dominated gene; TFIIH binding no change upon 3' heat shock
YDR533C	-0.909813	-0.502	-3.13477	0.178202	-0.427378	-0.123754		1.1601		0.384942	0.384942			SAGA-dominated gene; TFIIH binding no change upon 3' heat shock
YEL017C-A	-0.21979		-2.99287	0.167354	-0.15921	0.0225575	-1.05684	-0.955606	-0.631947	-0.234695	-0.433321	-1.37616		SAGA-dominated gene; TFIIH binding no change upon 3' heat shock
YEL063C	-0.598863	-0.3748	-2.41286	0.177087	0.0243325	0.0648189	-0.773761	-0.521395	0.081688	0.0105459	0.0461169	-1.40369		SAGA-dominated gene; TFIIH binding no change upon 3' heat shock
YER024W	-0.505935	0.16062	-1.4436	-0.0744851	0.248863	-0.00470022	-0.614443		-0.753483	0.219113	-0.267185	0.084592		SAGA-dominated gene; TFIIH binding no change upon 3' heat shock
YER064C	-0.301672	-0.23889	-2.41322	0.0469712	0.169455	0.152772	-0.782194	-0.763799	-0.372113	0.311697	-0.0302078	-0.965811		SAGA-dominated gene; TFIIH binding no change upon 3' heat shock
YER069W	-1.44754			0.13991	0.100285	-0.064028	-1.40075	-1.23761	-0.55909	0.0276315	-0.265729	-0.767748		SAGA-dominated gene; TFIIH binding no change upon 3' heat shock
YER073W	-0.574026	-0.11733	-3.86819	0.103501	0.0369671	0.175481	-1.51805	-1.15119	-0.26642	0.0783334	-0.0940434	-1.59958		SAGA-dominated gene; TFIIH binding no change upon 3' heat shock
YER121W	-0.919242		-3.18673	-0.149524	0.37554	-0.108626	-0.927388	-1.28626	-0.498264	0.258833	-0.119715			SAGA-dominated gene; TFIIH binding no change upon 3' heat shock
YER130C	-1.60408		-2.8974	0.184076	-0.819829	-0.377702	-0.752594	-0.57497	-0.113731	-0.316292	-0.215011	-1.34716		SAGA-dominated gene; TFIIH binding no change upon 3' heat shock
YER158C	-0.462533		-2.02315	0.0424966	-0.159218	0.0567421	-0.816753	-0.718296	-0.336349	-0.0453035	-0.190826	-1.53257		SAGA-dominated gene; TFIIH binding no change upon 3' heat shock
YFL008W	-0.0496043		-1.46778	-0.0917079	-0.0264298	-0.0581907	-0.370341	-0.054393	-0.237566	0.0946009	-0.0714825	-1.5013		SAGA-dominated gene; TFIIH binding no change upon 3' heat shock
YFR033C	0.0400596	-0.26748	-1.92782	0.20397	-0.0803217	0.0241208	-0.724293	-0.785939	-0.022111	0.482617	0.230253	-1.00579		SAGA-dominated gene; TFIIH binding no change upon 3' heat shock
YGL008C	-1.01217	-0.35919	-3.24838	0.147148	-0.312485	-0.196418	-1.43985	-0.473635	-0.676152	-0.357271	-0.516712	-1.73769		SAGA-dominated gene; TFIIH binding no change upon 3' heat shock
YGL045W	-0.198666		-1.28158	0.0734427	-0.123681	0.0276778	-0.402526	-0.134752	0.051587		0.051587	0.109454		SAGA-dominated gene; TFIIH binding no change upon 3' heat shock
YGL049C	0.0250023		-1.84581	0.183912	0.108791	0.258587	-1.16243	-0.892186	-0.330327	0.111288	-0.10952	-1.27384		SAGA-dominated gene; TFIIH binding no change upon 3' heat shock
YGL117W	-1.47624		-5.15137	0.0798331	-0.102126	-0.0651807	-2.23336	-1.21512	-0.763255	0.104458	-0.329399	-1.63352		SAGA-dominated gene; TFIIH binding no change upon 3' heat shock
YGL121C	-1.15281		-3.8212	0.00307619	-0.468971	-0.0608325	-2.55334	-1.50717	-0.416108	-0.243685	-0.329896	-3.22828		SAGA-dominated gene; TFIIH binding no change upon 3' heat shock
YGR086C	-0.916203	-0.58369	-3.244	0.143156	0.132153	0.0504945	-0.594105	-1.18817	-0.118776	0.025241	-0.0467675	-0.870471		SAGA-dominated gene; TFIIH binding no change upon 3' heat shock
YGR130C	-0.0260558		-2.1433	-0.0259192	0.480429	-0.0493367	-0.876054	-0.907608	-0.538792	-0.0728127	-0.305802	-1.92396		SAGA-dominated gene; TFIIH binding no change upon 3' heat shock
YGR136W	0.0215537	-0.063222	-1.52776	-0.0418927	0.051545	0.253975	-0.795082	-0.174209	-0.299312	-0.160429	-0.229871	-0.54658		SAGA-dominated gene; TFIIH binding no change upon 3' heat shock
YGR138C	-1.48252		-3.31134	0.174759	-0.430381	-0.0683844	-0.646155	-0.753678	-0.105539	-0.568468	-0.337004	-0.637073		SAGA-dominated gene; TFIIH binding no change upon 3' heat shock
YGR149W	0.0439115	-0.12677	-1.55685	0.113368	0.17259	-0.0382297	-0.726798	-0.387639	-0.336259	0.254364	-0.0409478	-0.450164		SAGA-dominated gene; TFIIH binding no change upon 3' heat shock
YGR189C	-0.719927	-0.42316	-3.24568	0.126449	-0.179822	0.0631222								SAGA-dominated gene; TFIIH binding no change upon 3' heat shock
YGR192C		-0.042718												SAGA-dominated gene; TFIIH binding no change upon 3' heat shock
YGR197C	-0.80443	0.50073		0.223615	-0.053262			-0.929766						SAGA-dominated gene; TFIIH binding no change upon 3' heat shock
YGR239C	-0.967063		-3.39752	0.0782563	-0.258195	0.247223	-0.617507	-0.219876	-0.073397	0.787641	0.357122	-1.33279		SAGA-dominated gene; TFIIH binding no change upon 3' heat shock
YGR244C	-0.710813	-0.75351	-4.03683	0.136038	0.135204	0.112068	-1.53842	-0.840965	-0.467778	-0.0269947	-0.247386	-2.0768		SAGA-dominated gene; TFIIH binding no change upon 3' heat shock
YGR271W	0.236326		1.33127		0.0696156	-0.0577153	1.81529	1.52901	2.61514	2.687	2.65107	1.60004		SAGA-dominated gene; TFIIH binding no change upon 3' heat shock
YHL002W	0.122669		-1.27624	-0.168157	0.179313	0.246334	-0.852266	0.0175711	-0.353431	0.154394	-0.0995185	-1.00674		SAGA-dominated gene; TFIIH binding no change upon 3' heat shock
YHL016C	-0.8455		-2.1028	0.0985078	0.0542393	-0.00947398	1.11826	1.21898		2.16823	2.16823	-0.465271		SAGA-dominated gene; TFIIH binding no change upon 3' heat shock
YHR005C	0.13414	0.30522	-1.67808	0.00811841	0.17095	0.127425	-1.182	-0.364484	-0.048522	0.254042	0.10276	-1.34078		SAGA-dominated gene; TFIIH binding no change upon 3' heat shock
YHR018C	-0.213898	0.36888	-2.29156		0.0203098	-0.0376539	-1.33877	0.19016				-0.900465		SAGA-dominated gene; TFIIH binding no change upon 3' heat shock
YHR030C	-0.935159		-2.47598	-0.00849197	0.193572	0.0708289	-1.38228	-0.207228	-0.424064	0.193685	-0.11519	-1.24735		SAGA-dominated gene; TFIIH binding no change upon 3' heat shock
YHR092C	-1.69802	0.059389	-5.11904	0.142156	0.4515	0.175955	-0.67983	-1.81577	-1.22279	-0.574006	-0.898398	-1.30766		SAGA-dominated gene; TFIIH binding no change upon 3' heat shock
YHR137W	0.3727		-1.09305	0.173906	-0.216108	-0.090275	0.862569	0.301038	0.094093	0.423792	0.258942	0.739796		SAGA-dominated gene; TFIIH binding no change upon 3' heat shock
YHR143W	-0.805082	-0.93561	-3.11632	0.160168	-0.0205691	0.163899		1.17388		0.808007	0.808007	0.174956		SAGA-dominated gene; TFIIH binding no change upon 3' heat shock
YHR186C	-0.807087		-2.90506	-0.0645579	0.00389286	0.0775618	-1.14805	-0.831656	-0.750542	-0.0897975	-0.42017	-0.690692		SAGA-dominated gene; TFIIH binding no change upon 3' heat shock
YIL117C	-0.0562362		-1.77161	-0.0638938	0.182887	0.164239	-1.03007	-0.669702	0.041136	0.46084	0.250988	-0.541264		SAGA-dominated gene; TFIIH binding no change upon 3' heat shock
YIR034C	0.49716		-0.76765	0.0560603	0.026844	0.0728295	-0.418556	0.717477	-0.163241	0.384387	0.110573	-0.821462		SAGA-dominated gene; TFIIH binding no change upon 3' heat shock
YJL079C	-1.68084	0.38357	-3.48494	0.355072	0.119906	0.246095	-1.45627	-0.852619	-0.175264	0.0230663	-0.0760988	-2.04273		SAGA-dominated gene; TFIIH binding no change upon 3' heat shock
YJL108C	-1.36556		-3.41662	0.0193571	0.315511	0.0670266	-1.66118		-0.416941	0.117685	-0.149628	-1.82271		SAGA-dominated gene; TFIIH binding no change upon 3' heat shock
YJL151C	-0.430161	-0.75373	-1.64271	0.151755	-0.0327902	0.231232	-0.68142	0.858083	0.119693	0.421638	0.270665	-0.214671		SAGA-dominated gene; TFIIH binding no change upon 3' heat shock
YJL172W	-0.37828	-0.036976	-2.9858	-0.0738967	-0.169783	-0.114564	-0.954409	-0.194383	-0.068636	-0.145852	-0.107244	-1.20778		SAGA-dominated gene; TFIIH binding no change upon 3' heat shock
YJR008W	0.233794		-1.42905	-0.0955577	0.0462156	0.00390885	-0.458704	0.195262	0.02552	0.64314	0.33433	-0.74571		SAGA-dominated gene; TFIIH binding no change upon 3' heat shock
YJR109C	-0.604172		-3.38693	0.184937	0.132489	0.0289614	-1.67542	-0.26386	-0.461663	0.0558045	-0.202929	-1.46585		SAGA-dominated gene; TFIIH binding no change upon 3' heat shock
YJR115W	-0.26815		-2.22314	-0.0818207	0.41073	0.524485	-1.0746	-0.76767	-0.709536	0.17256	-0.268488	-1.62261		SAGA-dominated gene; TFIIH binding no change upon 3' heat shock
YJR152W	-0.493258		-1.94223	-0.0221474	0.0161593	-0.0750263	-0.69336	-0.0539257	-0.487709	-0.0113437	-0.249526	-1.56515		SAGA-dominated gene; TFIIH binding no change upon 3' heat shock
YKL103C	-0.0827742		-1.72983	0.0481007	-0.0171792	-0.18585	-0.937709	0.739535	0.18145	0.131701	0.156576	-0.934991		SAGA-dominated gene; TFIIH binding no change upon 3' heat shock
YKL152C	-0.283647	-0.40128	-2.13593			0.0911155		-0.225579		0.50459	0.50459			SAGA-dominated gene; TFIIH binding no change upon 3' heat shock
YKL201C	0.0294191	0.21185	-1.79263	-0.0348699	0.252524	0.197292	-1.26747	-0.564551	-0.086621		-0.086621	-1.41862		SAGA-dominated gene; TFIIH binding no change upon 3' heat shock
YKL218C	-1.28939		-4.11824	-0.18026	0.336091	0.0808033	-2.15435	-1.29211	-0.632308	0.344183	-0.144063	-1.3957		SAGA-dominated gene; TFIIH binding no change upon 3' heat shock
YKR061W	-1.62373		-2.88826	-0.00898534	0.00247783	0.076201	-1.37686	-1.45866	-0.666095	-0.18125	-0.423673	-0.581806		SAGA-dominated gene; TFIIH binding no change upon 3' heat shock
YKR075C	-1.75782		-4.68939	-0.0438636	0.469789	0.159329	-0.679346	-1.24867	-0.976026	0.348389	-0.313818	-1.37034		SAGA-dominated gene; TFIIH binding no change upon 3' heat shock
YKR077W	0.257473		-1.49855	0.15583	-0.296658	0.0428722	-0.890866	-0.110106	-0.065724	0.384357	0.159317	-0.195365		SAGA-dominated gene; TFIIH binding no change upon 3' heat shock
YKR080W	-0.773559	-0.67241	-2.26114	0.0324756	0.125911	0.180338	-1.09769	0.52072	-0.115864	0.924203	0.40417	-1.37938		SAGA-dominated gene; TFIIH binding no change upon 3' heat shock
YLL020C	-0.362653	-0.16738	-2.02061	0.0232365	-0.0536176	0.00740908	-0.437813	-0.87653	-0.508531	0.170043	-0.169244	-0.238946		SAGA-dominated gene; TFIIH binding no change upon 3' heat shock
YLL053C	-1.42182		-1.544	0.0295793	-0.191254	-0.083817	0.452426	-0.290345	0.707058	1.23409	0.970574			SAGA-dominated gene; TFIIH binding no change upon 3' heat shock
YLR023C	-0.277285	-0.49655	-1.61443	0.0183934	-0.005015	0.034146	-0.706251	-0.589044	-0.23998	0.234272	-0.00285377	0.12875		SAGA-dominated gene; TFIIH binding no change upon 3' heat shock
YLR053C	-0.745151		-1.77965	0.0706068	-0.237487	-0.013971	0.532173	-0.370664	1.3752	1.05466	1.21493			SAGA-dominated gene; TFIIH binding no change upon 3' heat shock
YLR058C	-0.740448	-0.69039	-1.10881	0.0239205	-0.00533202	0.0108627		0.840591		0.904375	0.904375			SAGA-dominated gene; TFIIH binding no change upon 3' heat shock
YLR110C		-0.37151			-0.0986484	0.190436		-0.621977	-0.415534	-0.238424	-0.326979	0.18178		SAGA-dominated gene; TFIIH binding no change upon 3' heat shock
YLR134W	-0.694418	-0.55164	-2.65787	0.2371	-0.127174	-0.107487	0.023481	0.170468	0.288127	0.449938	0.369033	0.580132		SAGA-dominated gene; TFIIH binding no change upon 3' heat shock
[truncated: 4,238 more rows]
