# Supplementary material for: Widespread and precise reprogramming of yeast protein–genome interactions in response to heat shock
Source: HighWire-hosted journal article supplement (doi:10.1101/gr.226761.117), 2018-02-14
Supplement: Supplemental_Methods.zip [file Input Dataset Identifiers.xlsx]

## Sheet: Supplemental_Table_S1
Supplemental_Table_S1. Input datasets used in this study.
Figure	Panel	Factor	Target	Condition	Assay	Starting input data file name(s) (separate file names with a semicolon ";")
1	-	Nuc	H3-MNase	Mock	MN	MNase_H3_MHS_01101sacCer3_shift73.tab
1	-	Nuc	H3-MNase	3min	MN	MNase_H3_HS_01102sacCer3_shift73.tab
1	-	H2AZ	Htz1	Mock	XO	50416sacCer3.tab
1	-	H2AZ	Htz1	3min	XO	50417sacCer3.tab
1	-	SAGA	Spt3	Mock	XO	50525sacCer3.tab
1	-	SAGA	Spt3	3min	XO	50526sacCer3.tab
1	-	Hsf1	Hsf1	Mock	XO	53301sacCer3.tab
1	-	Hsf1	Hsf1	3min	XO	53302sacCer3.tab
1	-	TFIIB	Sua7	Mock	XO	50428sacCer3.tab
1	-	TFIIB	Sua7	3min	XO	50429sacCer3.tab
1	-	TFIIH	Ssl2	Mock	XO	50519sacCer3.tab
1	-	TFIIH	Ssl2	3min	XO	50520sacCer3.tab
1	-	FACT	Spt16	Mock	XO	53407sacCer3.tab
1	-	FACT	Spt16	3min	XO	53408sacCer3.tab
1	-	Pol II	Rpb3	Mock	XO	53824sacCer3.tab
1	-	Pol II	Rpb3	3min	XO	53825sacCer3.tab
1	-	Pol II	Ser7p	Mock	XO	53814sacCer3.tab
1	-	Pol II	Ser7p	3min	XO	53815sacCer3.tab
1	-	Pol II	Ser5p	Mock	XO	53811sacCer3.tab
1	-	Pol II	Ser5p	3min	XO	53812sacCer3.tab
1	-	Pol II	Ser2p	Mock	XO	53809sacCer3.tab
1	-	Pol II	Ser2p	3min	XO	53810sacCer3.tab
1	-	TFIIB	PIP-seq	Mock	XO	56422sacCer3.tab
1	-	TFIIB	PIP-seq	3min	XO	56423sacCer3.tab
2	A	Nuc	H3-MNase	Mock	MN	MNase_H3_MHS_01101sacCer3_shift73.tab
2	A	H2AZ	Htz1	Mock	XO	50416sacCer3.tab
2	A	SWR1	Swr1	Mock	XO	50513sacCer3.tab
2	A	RSC	Rsc9	Mock	XO	50501sacCer3.tab
2	A	SAGA	Spt3	Mock	XO	50525sacCer3.tab
2	A	TBP	Spt15	Mock	XO	53319sacCer3.tab
2	A	TFIIB	Sua7	Mock	XO	50428sacCer3.tab
2	A	TFIID	Taf1	Mock	XO	50531sacCer3.tab
2	A	TFIIH	Ssl2	Mock	XO	50519sacCer3.tab
2	A	Pol II	Rpb3	Mock	XO	54513sacCer3.tab
2	A	FACT	Spt16	Mock	XO	51825sacCer3.tab
2	A	BY4741	No tag	Mock	XO	53803sacCer3.tab
2	B	Nuc	H3-MNase	3min	MN	MNase_H3_HS_01102sacCer3_shift73.tab
2	B	H2AZ	Htz1	3min	XO	50417sacCer3.tab
2	B	SWR1	Swr1	3min	XO	50514sacCer3.tab
2	B	RSC	Rsc9	3min	XO	50502sacCer3.tab
2	B	SAGA	Spt3	3min	XO	50526sacCer3.tab
2	B	TBP	Spt15	3min	XO	53320sacCer3.tab
2	B	TFIIB	Sua7	3min	XO	50429sacCer3.tab
2	B	TFIID	Taf1	3min	XO	50532sacCer3.tab
2	B	TFIIH	Ssl2	3min	XO	50520sacCer3.tab
2	B	Pol II	Rpb3	3min	XO	54514sacCer3.tab
2	B	FACT	Spt16	3min	XO	53407sacCer3.tab
2	B	BY4741	No tag	3min	XO	53804sacCer3.tab
3	-	Nuc	H3-MNase	Mock	MN	MNase_H3_MHS_01101sacCer3_shift73.tab
3	-	Nuc	H3-MNase	5min	MN	MNase_H3_HS_01102sacCer3_shift73.tab
3	-	RSC	Rsc9	Mock	XO	50501sacCer3.tab
3	-	RSC	Rsc9	3min	XO	50502sacCer3.tab
3	-	SAGA	Spt3	Mock	XO	50525sacCer3.tab
3	-	SAGA	Spt3	3min	XO	50526sacCer3.tab
3	-	FACT	Spt16	Mock	XO	51825sacCer3.tab
3	-	FACT	Spt16	3min	XO	53407sacCer3.tab
3	-	TBP	Spt15	Mock	XO	53319sacCer3.tab
3	-	TBP	Spt15	3min	XO	53320sacCer3.tab
3	-	TFIIB	Sua7	Mock	XO	50428sacCer3.tab
3	-	TFIIB	Sua7	3min	XO	50429sacCer3.tab
3	-	TFIID	Taf1	Mock	XO	50531sacCer3.tab
3	-	TFIID	Taf1	3min	XO	50532sacCer3.tab
3	-	TFIIH	Ssl2	Mock	XO	50519sacCer3.tab
3	-	TFIIH	Ssl2	3min	XO	50520sacCer3.tab
3	-	Pol II	Rpb3	Mock	XO	54513sacCer3.tab
3	-	Pol II	Rpb3	3min	XO	54514sacCer3.tab
3	-	Pol II	Ser7p	Mock	XO	53814sacCer3.tab
3	-	Pol II	Ser7p	3min	XO	53815sacCer3.tab
3	-	Pol II	Ser5p	Mock	XO	53811sacCer3.tab
3	-	Pol II	Ser5p	3min	XO	53812sacCer3.tab
3	-	Pol II	Ser2p	Mock	XO	53809sacCer3.tab
3	-	Pol II	Ser2p	3min	XO	53810sacCer3.tab
4	B	Hsf1	Hsf1	3min	XO	53302sacCer3.tab;59802sacCer3.tab;59805sacCer3.tab
4	B	SAGA	Spt3	3min	XO	50526sacCer3.tab
4	B	TFIIB	Sua7	3min	XO	50429sacCer3.tab
4	C	SAGA	Spt3	3min	XO	50526sacCer3.tab
5	A	Nuc	H3-MNase	0min	MN	MNase_H3_MHS_01101sacCer3_shift73.tab
5	A	RSC	Rsc9	Mock	XO	50501sacCer3.tab
5	A	RSC	Rsc9	3min	XO	50502sacCer3.tab
5	B	Nuc	H3-MNase	0min	MN	MNase_H3_MHS_01101sacCer3_shift73.tab
5	B	RSC	Rsc9	Mock	XO	50501sacCer3.tab
5	B	RSC	Rsc9	3min	XO	50502sacCer3.tab
5	B	RSC	Rsc9	6min	XO	50503sacCer3.tab
5	B	RSC	Rsc9	9min	XO	50504sacCer3.tab
5	B	RSC	Rsc9	12min	XO	50505sacCer3.tab
5	B	RSC	Rsc9	15min	XO	50506sacCer3.tab
6	A	Nuc	H3-MNase	Mock	MN	MNase_H3_MHS_01101sacCer3_shift73.tab
6	A	Pol II	Rpb3	Mock	XO	51835sacCer3.tab
6	A	FACT	Spt16	Mock	XO	51825sacCer3.tab;51827sacCer3.tab
6	B	Nuc	H3-MNase	Mock	MN	MNase_H3_MHS_01101sacCer3_shift73.tab
6	B	Pol II	Rpb3	Mock	XO	53824sacCer3.tab
6	B	Pol II	Rpb3	3min	XO	53825sacCer3.tab
6	B	Pol II	Rpb3	6min	XO	53826sacCer3.tab
6	B	Nuc	H3-MNase	Mock	MN	MNase_H3_MHS_01101sacCer3_shift73.tab
6	B	FACT	Spt16	Mock	XO	53407sacCer3.tab
6	B	FACT	Spt16	3min	XO	53408sacCer3.tab
6	B	FACT	Spt16	6min	XO	53409sacCer3.tab
7	A	TFIIB	Sua7	0min	PS	56422sacCer3.tab;56428sacCer3.tab
7	A	TFIIB	Sua7	3min	PS	56423sacCer3.tab;56429sacCer3.tab
7	A	TFIIB	Sua7	6min	PS	56424sacCer3.tab;56430sacCer3.tab
7	B	TFIIB	Sua7	0min	XO	51829sacCer3.tab
7	B	TFIIB	Sua7	3min	XO	51830sacCer3.tab
7	B	TFIIB	Sua7	6min	XO	51831sacCer3.tab
7	B	TFIIB	Sua7	0min	PS	56422sacCer3.tab;56428sacCer3.tab
7	B	TFIIB	Sua7	3min	PS	56423sacCer3.tab;56429sacCer3.tab
7	B	TFIIB	Sua7	6min	PS	56424sacCer3.tab;56430sacCer3.tab
S1	A	TFIIH	Ssl2	0min	XO	19325sacCer3.tab;19339sacCer3.tab;50519sacCer3.tab
S1	A	TFIIH	Ssl2	3min	XO	32321sacCer3.tab;50520sacCer3.tab
S1	A	TFIIH	Ssl2	6min	XO	32322sacCer3.tab;50521sacCer3.tab
S1	A	TFIIH	Ssl2	9min	XO	32323sacCer3.tab;50522sacCer3.tab
S1	A	TFIIH	Ssl2	12min	XO	32324sacCer3.tab;50523sacCer3.tab
S1	A	TFIIH	Ssl2	15min	XO	32325sacCer3.tab;50524sacCer3.tab
S1	B	Pol II	Rpb3	0min	XO	53824sacCer3.tab
S1	B	TFIIH	Ssl2	0min	XO	50519sacCer3.tab
S1	B	TFIIB	Sua7	0min	XO	50428sacCer3.tab
S2	A	TFIIH	Ssl2	0min	XO	50519sacCer3.tab
S2	A	TFIIH	Ssl2	3min	XO	50520sacCer3.tab
S2	A	TFIIH	Ssl2	6min	XO	50521sacCer3.tab
S2	A	TFIIH	Ssl2	9min	XO	50522sacCer3.tab
S2	A	TFIIH	Ssl2	12min	XO	50523sacCer3.tab
S2	A	TFIIH	Ssl2	15min	XO	50524sacCer3.tab
S2	A	SAGA	Spt3	0min	XO	50525sacCer3.tab
S2	A	SAGA	Spt3	3min	XO	50526sacCer3.tab
S2	A	SAGA	Spt3	6min	XO	50527sacCer3.tab
S2	A	SAGA	Spt3	9min	XO	50528sacCer3.tab
S2	A	SAGA	Spt3	12min	XO	50529sacCer3.tab
S2	A	SAGA	Spt3	15min	XO	50530sacCer3.tab
S3	A	SAGA	Spt3	0min	XO	50525sacCer3.tab
S3	A	SAGA	Spt3	3min	XO	50526sacCer3.tab
S3	A	SAGA	Spt3	6min	XO	50527sacCer3.tab
S3	A	SAGA	Spt3	9min	XO	50528sacCer3.tab
S3	A	SAGA	Spt3	12min	XO	50529sacCer3.tab
S3	A	SAGA	Spt3	15min	XO	50530sacCer3.tab
S3	A	TBP	Spt15	0min	XO	53319sacCer3.tab
S3	A	TBP	Spt15	3min	XO	53320sacCer3.tab
S3	A	TBP	Spt15	6min	XO	53321sacCer3.tab
S3	A	TFIIB	Sua7	0min	XO	50428sacCer3.tab
S3	A	TFIIB	Sua7	3min	XO	50429sacCer3.tab
S3	A	TFIIB	Sua7	6min	XO	50430sacCer3.tab
S3	A	TFIID	Taf1	0min	XO	50531sacCer3.tab
S3	A	TFIID	Taf1	3min	XO	50532sacCer3.tab
S3	A	TFIID	Taf1	6min	XO	50533sacCer3.tab
S3	A	TFIID	Taf1	9min	XO	50534sacCer3.tab
S3	A	TFIID	Taf1	12min	XO	50535sacCer3.tab
S3	A	TFIID	Taf1	15min	XO	50536sacCer3.tab
S3	A	TFIIH	Ssl2	0min	XO	50519sacCer3.tab
S3	A	TFIIH	Ssl2	3min	XO	50520sacCer3.tab
S3	A	TFIIH	Ssl2	6min	XO	50521sacCer3.tab
S3	A	TFIIH	Ssl2	9min	XO	50522sacCer3.tab
S3	A	TFIIH	Ssl2	12min	XO	50523sacCer3.tab
S3	A	TFIIH	Ssl2	15min	XO	50524sacCer3.tab
S3	A	Pol II	Rpb3	0min	XO	51835sacCer3.tab
S3	A	Pol II	Rpb3	3min	XO	51836sacCer3.tab
S3	A	Pol II	Rpb3	6min	XO	51837sacCer3.tab
S3	A	Pol II	Rpb3	9min	XO	51838sacCer3.tab
S3	A	Pol II	Rpb3	12min	XO	51839sacCer3.tab
S3	A	Pol II	Rpb3	15min	XO	51840sacCer3.tab
S3	A	Hsf1	Hsf1	0min	XO	53301sacCer3.tab;59801sacCer3.tab;59804sacCer3.tab
S3	A	Hsf1	Hsf1	3min	XO	53302sacCer3.tab;59802sacCer3.tab;59805sacCer3.tab
S3	A	Hsf1	Hsf1	6min	XO	53303sacCer3.tab;59803sacCer3.tab;59806sacCer3.tab
S3	B	See	Figure	2
S4		Nuc	H3-MNase	Mock	MN	MNase_H3_MHS_01101sacCer3_shift73.tab
S4		Nuc	H3-MNase	5min	MN	MNase_H3_HS_01102sacCer3_shift73.tab
S5	-	SAGA	Spt7	0min	XO	Spt7_i5006_BY4741_-_YPD_MHS_XO111_xum62-161011_Pugh63657sacCer3_4.35_shift6.tab
S5	-	SAGA	Ubp8	0min	XO	Ubp8_i5006_BY4741_-_YPD_MHS_XO111_xum62-161011_Pugh63659sacCer3_5.57_shift6.tab
S5	-	SAGA	Sgf11	0min	XO	Sgf11_BY4741_MHS_170202_xum62_sacCer3_READ1_13.63_shift6.tab
S5	-	SAGA	No tag	0min	XO	masterNotag_20170321_READ1_1.0_shift6.tab
S5	-	SAGA	Spt7	6min	XO	Spt7_i5006_BY4741_-_YPD_HS_XO111_xum62-161011_Pugh63658sacCer3_4.94_shift6.tab
S5	-	SAGA	Ubp8	6min	XO	Ubp8_i5006_BY4741_-_YPD_HS_XO111_xum62-161011_Pugh63660sacCer3_3.87_shift6.tab
S5	-	SAGA	Sgf11	6min	XO	Sgf11_BY4741_HS_170202_xum62_sacCer3_READ1_59.48_shift6.tab
S5	-	SAGA	No tag	6min	XO	NoTag_i5006_BY4741_-_YPD_HS_XO111_xum62-161011_Pugh63656sacCer3_10.47_shift6.tab
S6	-	RSC	Rsc9	0min	XO	7939_Rsc9_YPD.bam
S6	-	RSC	Rsc1	0min	XO	15809_Rsc1_i5006_BY4741_-_YPD_-_XO.bam
S6	-	RSC	Rsc3	0min	XO	11848_Rsc3_YPD.bam
S6	-	RSC	Rsc58	0min	XO	11855_Rsc58_YPD.bam
S6	-	RSC	Rsc6	0min	XO	11856_Rsc6_YPD.bam
S6	-	RSC	Sth1	0min	XO	15805_Sth1_i5006_BY4741_-_YPD_-_XO.bam
S6	-	RSC	Rsc9	6min	XO	7941_Rsc9_6HS.bam
S6	-	RSC	Rsc1	6min	XO	15816_Rsc1_i5006_BY4741_-_YPD_HeatShock_XO.bam
S6	-	RSC	Rsc3	6min	XO	15815_Rsc3_i5006_BY4741_-_YPD_HeatShock_XO.bam
S6	-	RSC	Rsc58	6min	XO	15810_Rsc58_i5006_BY4741_-_YPD_HeatShock_XO.bam
S6	-	RSC	Rsc6	6min	XO	15814_Rsc6_i5006_BY4741_-_YPD_HeatShock_XO.bam
S6	-	RSC	Sth1	6min	XO	15812_Sth1_i5006_BY4741_-_YPD_HeatShock_XO.bam
S7	A	TBP	Spt15	0min	XO	53319sacCer3.tab
S7	A	TBP	Spt15	3min	XO	53320sacCer3.tab
S7	A	TBP	Spt15	6min	XO	53321sacCer3.tab
S7	B	TFIIB	Sua7	0min	XO	51829sacCer3.tab
S7	B	TFIIB	Sua7	0min	PS	56422sacCer3.tab;56428sacCer3.tab
S7	C	TFIIB	Sua7	0min	XO	51829sacCer3.tab
S7	C	TFIIB	Sua7	0min	PS	56422sacCer3.tab;56428sacCer3.tab
S8	-	Pol II	Rpb3	Mock	XO	53816sacCer3.tab
S8	-	Pol II	Ser7p	Mock	XO	53814sacCer3.tab
S8	-	Pol II	Ser5p	Mock	XO	53811sacCer3.tab
S8	-	Pol II	Ser2p	Mock	XO	53810sacCer3.tab
S8	-	Pol II	Rpb3	3min	XO	51836sacCer3.tab
S8	-	Pol II	Ser7p	3min	XO	53815sacCer3.tab
S8	-	Pol II	Ser5p	3min	XO	53812sacCer3.tab
S8	-	Pol II	Ser2p	3min	XO	53810sacCer3.tab
